# Supplementary material
Source: HighWire-hosted journal article supplement (doi:10.1101/rna.080953.126)
Supplement: Supplemental_TableLegends.docx [file Supplemental_TableLegends.docx]

**SUPPLEMENTARY TABLE LEGENDS**

**Supplementary Table S1. Strains, plasmids and oligonucleotides list.**

**Supplementary Table S2. Changes in protein aggregation in *not4Δ* vs *not4Δ puf3Δ.*** Differences in identification of proteins in aggregates from *not4Δ* vs *not4Δpuf3Δ* are expressed in log2 fold ratios.

**Supplementary Table S3. GO-term enrichments.** The GO-terms enriched within proteins more aggregated in *not4Δpuf3Δ* vs *not4Δ* are presented in tab (1), those enriched within the proteins less aggregated in *not4Δpuf3Δ* than in *not4Δ* intab (2) or those enriched within the 500 top rare Arg-codon containing mRNAs in tab (3).

**Supplementary Table S4. Abundance and charging of tRNAs in wild type, *not4Δ*, *puf3Δ* and *not4Δpuf3Δ.***

**Supplementary Table S5. The results of the quantitative mass spectrometry of Puf3-TAP interactors in wild type and in *not4Δ* cells.** The analysis of the Puf3 interactome with the retained samples of the experiment in triplicate, dropping sample 6, are presented in this table, with the proteins enriched in the Puf3 interactome from wild type cells in tab 1 and those from mutant cells in tab 2. The interactomes from wild type and mutant were compared, and the proteins enriched in the wild type over the mutant are presented in tab 3, those enriched in the mutant over the wild type in tab 4. The proteins enriched in the interactome of the wild type over the mutant and enriched in the specific immunoprecipitate of wild type over the untagged control is presented in tab 5, whereas those enriched in the mutant over the wild type and in the specific immunoprecipitate from the mutant over the untagged control are in tab 6. Enriched GO-terms for these last 2 sets of proteins (tabs 5 and 6) are presented in tabs 7 and 8.
