# Supplementary material
Source: HighWire-hosted journal article supplement (doi:10.1101/rna.080953.126)
Supplement: SupplementalTableS3.xlsx [file SupplementalTableS3.xlsx]

## Sheet: (1) more aggr. in not4D puf3D 
GO-terms enriched for proteins more aggregated in not4D puf3D than in not4D
PATH	ExpectedHitsInPATH	NumHitsInPATH	TotInPATH	RawPvalue	AdjPvalue	Represented	SigsInPath
Hsp90 interactors	7.62712	29	485	9.04402e-11	2.71321e-10	OVER	ADK1 , ADO1 , AHP1 , COF1 , CPR1 , DUG1 , ENO1 , ENO2 , ERG20 , HSP12 , HXK1 , IPP1 , OYE2 , PGI1 , PIM1 , POL30 , RNR2 , SAH1 , SOD1 , TAL1 , TDH1 , TPI1 , TRX1 , TRX2 , TSA1 , WTM1 , YBR053C , YNL134C , YPR148C
All Puf3 core targets	9.84449	29	626	3.64108e-08	1.06858e-07	OVER	CYT2 , HSP10 , SDH7 , MZM1 , COX10 , CMC2 , SDH5 , MEF1 , YIA6 , OMS1 , RDL2 , TIM10 , CMC1 , RPO41 , RRF1 , SHE9 , RIB3 , COA3 , MBA1 , YDR381C-A , TIM8 , COX11 , SCO1 , ATP12 , PIM1 , PET117 , YIL077C , YDC1 , DUT1
nucleobase-containing small molecule metabolic process_GO:0055086	2.97222	14	189	1.13164e-06	3.25044e-06	OVER	PGI1 , DUT1 , TPI1 , ADK1 , SAH1 , HXK1 , ENO1 , ENO2 , RNR2 , TDH1 , ADO1 , PNP1 , TAL1 , URA5
protein complex biogenesis_GO:0070271	4.60772	16	293	1.01491e-05	2.85443e-05	OVER	PIM1 , CMC2 , SCO1 , MBA1 , MZM1 , SDH7 , PET117 , COA3 , ATP12 , CYT2 , CMC1 , YKE2 , SDH5 , HSP10 , PFY1 , COX11
generation of precursor metabolites and energy_GO:0006091	2.34318	11	149	1.82942e-05	5.04023e-05	OVER	PGI1 , TPI1 , RIB3 , HXK1 , ENO1 , AAP1 , ENO2 , TDH1 , SOD1 , SDH5 , COX11
Puf3 core targets Group 1	2.04438	10	130	3.16612e-05	8.54853e-05	OVER	CYT2 , HSP10 , SDH7 , MZM1 , COX10 , CMC2 , SDH5 , MEF1 , YIA6 , OMS1
mitochondrion organization_GO:0007005	5.99161	17	381	7.15785e-05	0.000185829	OVER	CMC2 , MBA1 , SHE9 , MZM1 , SDH7 , PET117 , RPO41 , TIM10 , RRF1 , TPM2 , COA3 , ATP12 , TIM8 , CMC1 , MEF1 , SDH5 , HSP10
response to oxidative stress_GO:0006979	1.65123	8	105	0.00021934	0.000558696	OVER	GRX1 , YPR1 , HSP12 , SOD1 , CCP1 , TRX1 , AHP1 , TSA1
carbohydrate metabolic process_GO:0005975	3.0823	10	196	0.000927772	0.00231943	OVER	PGI1 , TPI1 , YPR1 , SDH7 , HXK1 , ENO1 , AAP1 , ENO2 , TDH1 , TSA1
cofactor metabolic process_GO:0051186	2.79923	9	178	0.00179687	0.0044105	OVER	PGI1 , TPI1 , HXK1 , ENO1 , ENO2 , TDH1 , PNP1 , TAL1 , COX10
Puf3 core targets Group 2	2.09156	7	133	0.00470399	0.01134	OVER	RDL2 , TIM10 , CMC1 , RPO41 , RRF1 , SHE9 , RIB3
monocarboxylic acid metabolic process_GO:0032787	2.18592	7	139	0.00598051	0.0139202	OVER	PGI1 , TUP1 , TPI1 , HXK1 , ENO1 , ENO2 , TDH1
Puf3 core targets Group 3	2.75205	8	175	0.00596711	0.0139202	OVER	COA3 , MBA1 , YDR381C-A , TIM8 , COX11 , SCO1 , ATP12 , PIM1
vacuole organization_GO:0007033	1.38389	5	88	0.0121043	0.0267881	OVER	TRX2 , ENO1 , ENO2 , TPM2 , TRX1

## Sheet: (2) less aggr. in not4D puf3D
GO-terms enriched within the proteins less aggregated in not4D puf3D than in not4D
PATH	ExpectedHitsInPATH	NumHitsInPATH	TotInPATH	RawPvalue	AdjPvalue	Represented	SigsInPath
rRNA processing_GO:0006364	41.4021	82	236	6.45451e-11	1.0892e-09	OVER	FUN12 , MAK5 , PAF1 , PWP2 , NOP1 , TSR1 , SAS10 , FAL1 , RPS13 , TMA64 , BFR2 , FCF1 , ESF1 , UTP6 , TOM1 , NUG1 , UTP7 , GLC7 , SPB4 , LOC1 , RPL30 , DBP3 , PRP43 , MRM2 , ROK1 , XRN1 , RAI1 , POP6 , NOP7 , ENP2 , SKI6 , EFG1 , RPL8A , PIH1 , RRP3 , LRP1 , IPI1 , RPF1 , IMP3 , DBP8 , UTP25 , BMT5 , NOP9 , HCA4 , MTR4 , UTP18 , UTP10 , HIT1 , URB1 , DHR2 , DBP7 , LAS1 , RPF2 , DRS1 , GRC3 , RPL8…
ribosomal large subunit biogenesis_GO:0042273	18.245	44	104	2.23705e-09	3.02002e-08	OVER	MAK5 , RSA4 , SYO1 , MAK21 , TOM1 , PUF6 , NUG1 , SPB4 , LOC1 , DBP3 , LSG1 , NSA1 , PRP43 , RAI1 , NOP7 , SDA1 , RPL8A , IPI1 , RPF1 , HIT1 , URB1 , DBP7 , LAS1 , RPF2 , DRS1 , RIX7 , GRC3 , RPL8B , DBP9 , RPP0 , ERB1 , RRP5 , HAS1 , NOP2 , NOP15 , IPI3 , DBP6 , BRX1 , NOP8 , NOC2 , NOG1 , RSA1 , NIP7 , RRP15
cytoskeleton organization_GO:0007010	41.7529	72	238	6.40839e-07	6.17952e-06	OVER	CDC24 , KIP1 , ARC40 , LSB5 , CDC10 , RVS161 , SYP1 , HCM1 , ARP2 , SHS1 , NUM1 , REF2 , RGA2 , SAC7 , BIM1 , TSC11 , GLC7 , YBP2 , SPC105 , KIP3 , SDA1 , YSC84 , MYO1 , BZZ1 , SLM1 , MLP2 , MHP1 , BIT61 , GEA1 , ARP3 , BUD4 , ARC19 , SFK1 , TOR2 , VPS1 , TUB4 , VRP1 , ARC18 , CRN1 , CDC5 , AVO2 , POM152 , CIK1 , DSK2 , ARK1 , SIW14 , NOP15 , SPC98 , CBK1 , BNI5 , SLA2 , BNI1 , PCL1 , MSB3 , CLA4…
ribosomal small subunit biogenesis_GO:0042274	22.8062	44	130	4.35172e-06	3.45577e-05	OVER	FUN12 , PWP2 , TSR1 , SAS10 , FAL1 , RPS13 , BFR2 , FCF1 , UTP6 , TOM1 , UTP7 , LOC1 , PRP43 , ROK1 , NOP7 , ENP2 , EFG1 , RRP3 , IMP3 , DBP8 , UTP25 , NOP9 , UTP18 , UTP10 , DHR2 , LTV1 , FCF2 , SGD1 , ECM16 , RRP5 , TMA23 , HAS1 , KRE33 , RIO2 , KRI1 , TSR4 , NOB1 , RIO1 , NOP58 , RRP12 , BMS1 , NEW1 , MRD1 , NOC4
DNA-templated transcription, termination_GO:0006353	7.5436	20	43	1.02486e-05	7.28192e-05	OVER	PTA1 , ISW1 , PAF1 , NSI1 , REF2 , CFT1 , GLC7 , DST1 , RTF1 , RAI1 , SPT6 , ESS1 , RPA12 , SWD2 , GRC3 , BUR2 , RNT1 , NRD1 , CTR9 , NAB3
protein phosphorylation_GO:0006468	34.2093	58	195	1.43213e-05	9.20653e-05	OVER	KIN3 , ALK2 , MEC1 , SLI15 , PAF1 , STE50 , SAT4 , CDC7 , STE7 , STE5 , KIN1 , PKH3 , SNF1 , PTP3 , RAD3 , RIM15 , ALK1 , PKP2 , ATG1 , HOS2 , RTF1 , DBF2 , SLT2 , IRE1 , KSP1 , PKP1 , SSL2 , CTK2 , YAK1 , HAL5 , ESS1 , PRR1 , YPK1 , CTK1 , TPK3 , TOR2 , BUR2 , STE11 , CTK3 , CDC5 , YPK2 , ARK1 , CBK1 , PCL1 , CLA4 , MCK1 , SSK2 , PSK2 , SKM1 , CTR9 , RIO1 , MKK1 , TPK2 , IPL1 , CCL1 , DBF20 , NC…
snoRNA processing_GO:0043144	7.71903	20	44	1.57286e-05	9.65164e-05	OVER	PAF1 , NOP1 , REF2 , XRN1 , RTF1 , POP6 , SKI6 , LRP1 , MTR4 , SWD2 , PAP1 , RNT1 , NRD1 , TRF5 , PRP2 , PAP2 , CTR9 , RRP6 , NAB3 , PRP4
invasive growth in response to glucose limitation_GO:0001403	10.3505	23	59	7.54779e-05	0.000407581	OVER	GPB2 , GPR1 , STE7 , PTP1 , STE5 , SNF1 , DSE1 , RME1 , YTA7 , OSH3 , STE11 , ASC1 , SAP30 , DIA1 , PHO23 , NCS2 , WHI3 , GAL11 , MSN1 , RGA1 , SNF2 , GPB1 , TPK2
DNA repair_GO:0006281	43.1564	67	246	7.31727e-05	0.000407581	OVER	FUN30 , NUP60 , RDH54 , TDP1 , RIF1 , PAF1 , RAD18 , MSH3 , CDC7 , CDC9 , LYS20 , RAD9 , HRQ1 , EAF1 , MUS81 , DOT1 , MCM3 , KRE29 , TPA1 , MAG1 , RAD3 , SMC1 , RAD54 , RTF1 , SWC4 , RAD2 , RTT107 , SSL2 , MCM10 , SMC3 , SRS2 , RAD26 , TAH11 , PAN3 , PRI2 , APN1 , TRM2 , NSE1 , RAD5 , SFH1 , PIF1 , RAD10 , PDS5 , CTF18 , MLH1 , PSY2 , RAD50 , TOF1 , RFC3 , MCK1 , SIN3 , MSH2 , RFC4 , PAP2 , CTR9 …
histone modification_GO:0016570	19.9993	36	114	0.00016408	0.000765334	OVER	ACS1 , MEC1 , TAF5 , PAF1 , NOP1 , GIS1 , HEL2 , DOT1 , ADA2 , HAT2 , GLC7 , TAF6 , HOS2 , RTF1 , SWC4 , SPT6 , GCN5 , ARD1 , SET1 , SET5 , HOS4 , ESS1 , JHD2 , SWD2 , SET3 , BRE2 , BUR2 , RCO1 , HDA1 , UBP10 , SIN3 , CTR9 , SPT20 , ESA1 , SGV1 , HDA3
transposition_GO:0032196	3.50865	11	20	0.000164405	0.000765334	OVER	STE7 , STE5 , RAD3 , RTT107 , SSL2 , RTT101 , STE11 , BDP1 , ELG1 , RPC40 , MMS1
Hsp90 interactors	85.0847	115	485	0.000191991	0.000863958	OVER	ACC1 , ACO1 , ACS1 , ADE4 , APA1 , ARB1 , ARC35 , ARC40 , ARO10 , ARP2 , ARP3 , ASC1 , BCH1 , BCY1 , CCT2 , CCT4 , CCT8 , CDC10 , CHA1 , CIN1 , COP1 , CPA2 , CPR6 , CRM1 , CTT1 , CYS4 , DBP5 , ECM29 , ERG13 , ERG6 , ETT1 , FAA1 , FAA4 , FUN12 , GCN1 , GCN20 , GGA2 , GIS2 , GLN4 , GPD2 , GPH1 , GUA1 , HAT2 , HOM3 , HYP2 , IDH1 , IDH2 , ILV2 , MCK1 , MES1 , MIS1 , MTR4 , MXR1 , MYO2 , NCP1 , NEW1 ,…
exocytosis_GO:0006887	8.59619	19	49	0.000341214	0.0014395	OVER	SWH1 , SRO77 , KIN1 , SEC1 , PEP7 , YPT31 , OSH7 , OSH3 , EXO70 , SMY1 , MYO3 , PEP3 , MYO5 , SLA2 , SEC2 , MSB3 , MSO1 , MYO2 , SRO7
mRNA Solubility High not1Deg, Low not4Deg	91.5757	121	522	0.000352058	0.00144024	OVER	PDR15 , PDR16 , RPF1 , YMR102C , ARP8 , BUD4 , KIP2 , ROX1 , PDH1 , TAF7 , NOB1 , RRP3 , PUT2 , BFR2 , ACO1 , TRF5 , TMA46 , PEX5 , NOP8 , IDH1 , LSB5 , CEG1 , CDC5 , CUE5 , PRP22 , IDH2 , HMX1 , SWI5 , REF2 , YGR266W , ECM16 , NUP60 , PHO23 , RPT3 , DCS2 , SGD1 , RRN3 , DBF2 , SYF1 , DSE1 , MRD1 , LTV1 , AIR2 , CUS1 , DBP8 , SIS1 , MSO1 , TFC4 , SAP185 , PRP4 , ELP3 , OSH7 , SAP30 , SKI3 , COQ3 …
cellular response to DNA damage stimulus_GO:0006974	52.1034	73	297	0.00104208	0.00413765	OVER	FUN30 , NUP60 , RDH54 , MEC1 , TDP1 , RIF1 , PAF1 , RAD18 , MSH3 , CDC7 , CDC9 , LYS20 , RAD9 , HRQ1 , EAF1 , MUS81 , DOT1 , LCD1 , MCM3 , KRE29 , TPA1 , GLC7 , MAG1 , RAD3 , SMC1 , RAD54 , RTF1 , SWC4 , RAD2 , RTT107 , SSL2 , MCM10 , SMC3 , SRS2 , RAD26 , TAH11 , TTI2 , PAN3 , PRI2 , APN1 , TRM2 , NSE1 , RAD5 , SFH1 , PIF1 , RAD10 , PDS5 , CTF18 , MLH1 , PSY2 , RAD50 , TOF1 , RFC3 , MCK1 , SIN3 …
signaling_GO:0023052	42.981	62	245	0.0011394	0.00439482	OVER	CDC24 , GPB2 , SEA4 , BIT2 , STE50 , GPR1 , STE7 , SOK1 , STE5 , MTC5 , MKC7 , DPL1 , RGA2 , SAC7 , PKH3 , NPR2 , PTP3 , TSC11 , BOI2 , DSE1 , HOS2 , MDS3 , PDE1 , EFG1 , SLT2 , IRE1 , KSP1 , BCY1 , SLM1 , BIT61 , EXO70 , FAR1 , IML1 , SFK1 , TPK3 , STE3 , CNB1 , TOR2 , SAP190 , STE11 , DCK1 , SST2 , GTR1 , AVO2 , ASC1 , PSY2 , PEX6 , SSK2 , AVO1 , IRA2 , RTC1 , SPT20 , ROD1 , SGT1 , RGA1 , LCB4 …
mitotic cell cycle_GO:0000278	55.963	77	319	0.00133317	0.00499937	OVER	CDC24 , ALK2 , KIP1 , PAF1 , CDC10 , SAT4 , CDC7 , CDC53 , CDC9 , SHS1 , RAD61 , SWI5 , REF2 , RAD9 , DOT1 , TOM1 , BIM1 , GLC7 , SMC1 , TUB2 , SMC2 , ALK1 , YBP2 , SPC105 , XRN1 , KIP3 , RME1 , SPT6 , CYS4 , SDA1 , RIM101 , SLT2 , CTF8 , IRR1 , RTT101 , SMC3 , SAP185 , FAR1 , ESS1 , NPA3 , BUD4 , BUD2 , MYO3 , SAP190 , MSA2 , TUB4 , BUR2 , CHS5 , VRP1 , TUB3 , CDC5 , PDS5 , CTF18 , MYO5 , CIK1 ,…
Golgi vesicle transport_GO:0048193	33.5076	50	191	0.00154763	0.00564676	OVER	SRO77 , SEC18 , TRS20 , COP1 , SEC31 , SHR3 , VPS54 , TRS85 , DOP1 , SEC26 , PEP7 , TRS120 , TRS31 , VPS52 , YPT31 , UBP3 , SEC27 , COG2 , APM2 , IRE1 , SFB3 , GGA2 , AGE2 , SEC28 , SEC24 , EXO70 , CHS6 , PHO86 , GEA1 , APL2 , BCH2 , PEP3 , CHS5 , VPS33 , COG8 , TRS130 , BCH1 , RSN1 , COG6 , SFB2 , SEC21 , MON2 , UFE1 , RUD3 , BUD7 , MUK1 , SEC16 , APL5 , SRO7 , SEC23
chromatin organization_GO:0006325	55.7875	76	318	0.00191563	0.00680552	OVER	FUN30 , ACS1 , NUP60 , MEC1 , MSI1 , TAF5 , ISW1 , RIF1 , PAF1 , NOP1 , CDC7 , LYS20 , NSI1 , PAA1 , GIS1 , FOB1 , SAS4 , RVB1 , ADR1 , HEL2 , EAF1 , DOT1 , ADA2 , MCM3 , HAT2 , SCS2 , GLC7 , TAF6 , RAD54 , HOS2 , DOC1 , RTF1 , SWC4 , SPT6 , GCN5 , YTA7 , ARD1 , SET1 , SET5 , HOS4 , MCM10 , ESS1 , RAD26 , JHD2 , SWD2 , SET3 , BRE2 , IFH1 , BUR2 , SFH1 , SIR3 , GTR1 , RCO1 , RNA1 , RNT1 , SAP30 , …
tRNA processing_GO:0008033	18.7713	31	107	0.00223071	0.00734503	OVER	PTA1 , PUS9 , AIR2 , TRM82 , CIA1 , CCA1 , PUS2 , CEG1 , SUA5 , POP6 , TRM5 , SAP185 , KTI12 , SAP190 , KAE1 , TRM2 , DUS3 , TRM12 , RPM2 , TRM732 , RIT1 , GCD10 , NCS2 , NRD1 , RIB2 , PAP2 , ISU2 , MOD5 , ELP3 , ISU1 , NAB3
organelle inheritance_GO:0048308	10.5259	20	60	0.00221078	0.00734503	OVER	MYO4 , ARP2 , RTN2 , NUM1 , SWA2 , PEP7 , PEX3 , VPS3 , SCS2 , OLE1 , ARP3 , ARC19 , ARC18 , BUL1 , CLA4 , ARC35 , MDM20 , SEY1 , MYO2 , NAT3
regulation of transport_GO:0051049	14.9118	26	85	0.00214498	0.00734503	OVER	PHO87 , VPS41 , SEC1 , SCS2 , UBP3 , FZF1 , ASK10 , UBR1 , SNG1 , SLT2 , PHO86 , PHO90 , YPK1 , TOR2 , PEP3 , MDM30 , VPS33 , ARK1 , RIO2 , CLA4 , SKM1 , ROD1 , LDB19 , RGC1 , NCE102 , SEC23
DNA replication_GO:0006260	24.3851	38	139	0.00242077	0.00778104	OVER	POL12 , RFC5 , MEC1 , RIF1 , MSH3 , CDC7 , POL3 , CDC9 , FOB1 , RNH202 , MCM3 , GLC7 , NOP7 , RRM3 , IPI1 , MCM10 , PRI1 , RTT101 , TAH11 , HCS1 , PRI2 , SFH1 , PIF1 , RCO1 , CTF18 , IPI3 , TOF1 , RFC3 , SIN3 , MSH2 , RFC4 , PSF3 , ELG1 , SNF2 , MCM4 , ORC4 , MMS1 , DPB2
organelle fission_GO:0048285	52.9806	72	302	0.00267477	0.00820667	OVER	CDC24 , ALK2 , KIP1 , RDH54 , MEC1 , CDC10 , MSH3 , CDC7 , SHS1 , RAD61 , TRS85 , SWI5 , NUM1 , MUS81 , DOT1 , TOM1 , BIM1 , GLC7 , SMC1 , RIM15 , TUB2 , RPN11 , SMC2 , ALK1 , YBP2 , SPC105 , HOS2 , KIP3 , RME1 , DBF2 , RIM101 , MSC7 , SET1 , CTF8 , IRR1 , FIS1 , HOS4 , RTT101 , SMC3 , NPA3 , BUD2 , VPS1 , SET3 , CAF4 , TUB4 , BUR2 , RAD10 , TUB3 , MSC1 , CDC5 , PDS5 , CTF18 , MLH1 , CIK1 , SPC98…
cytokinesis_GO:0000910	14.7363	25	84	0.00389029	0.0114172	OVER	CDC24 , SLI15 , CDC10 , SHS1 , REF2 , GLC7 , DBF2 , RIM101 , MYO1 , SLT2 , BUD4 , BUD2 , MYO3 , CHS5 , VRP1 , MYO5 , NOP15 , BNI4 , SLA2 , BNI1 , RTS1 , BUD7 , MYO2 , IPL1 , DBF20
RNA modification_GO:0009451	17.8941	29	102	0.0041223	0.0118406	OVER	NOP1 , PUS9 , AIR2 , TRM82 , CIA1 , PUS2 , MRM2 , SUA5 , TRM5 , BMT5 , SAP185 , KTI12 , TOR2 , SAP190 , KAE1 , TRM2 , DUS3 , TRM12 , TRM732 , RIT1 , NOP2 , GCD10 , NCS2 , RIB2 , PAP2 , ISU2 , MOD5 , ELP3 , ISU1
mRNA processing_GO:0006397	28.4201	42	162	0.00430476	0.0121071	OVER	PTA1 , PRP6 , ECM2 , MUD1 , PAF1 , PRP9 , REF2 , PRP28 , CFT1 , SYF1 , PRP22 , SMB1 , BRR2 , SAD1 , RPL30 , DST1 , PRP43 , CEG1 , RTF1 , SPT6 , CWC22 , SLT2 , SWD2 , CTK1 , SNU114 , PAP1 , PRP16 , PRP39 , RSE1 , RPM2 , CUS1 , HSH155 , YSF3 , NRD1 , PFS2 , PRP2 , CTR9 , SPT20 , SNU66 , NAB3 , THP3 , PRP4
DNA-templated transcription, initiation_GO:0006352	12.6311	22	72	0.00463203	0.0127617	OVER	TAF5 , ISW1 , TAF2 , RPT3 , SRB4 , DST1 , TAF6 , XRN1 , SPT6 , SSL2 , RPC17 , ESS1 , TFA1 , RRN3 , RPC25 , RPT1 , TAF7 , BDP1 , GAL11 , CTR9 , RPT4 , TAF3
transcription from RNA polymerase I promoter_GO:0006360	11.9294	21	68	0.00488258	0.0129245	OVER	ISW1 , PAF1 , NSI1 , DST1 , RTF1 , CTK2 , UTP10 , RPA12 , RRN3 , CTK1 , GRC3 , CTK3 , GTR1 , SAP30 , PHO23 , RPA49 , SIN3 , CTR9 , RIO1 , RPA135 , RPC40
regulation of translation_GO:0006417	18.0695	29	103	0.00480308	0.0129245	OVER	FUN12 , WHI4 , GCD6 , SNF1 , PUF6 , HYP2 , PET122 , ECM32 , GCN20 , RPS2 , SUA5 , GCN1 , GCD2 , SLH1 , CTK2 , CTK1 , GCN3 , TUB4 , CDC123 , GCD7 , CTK3 , ASC1 , DOM34 , MTQ1 , WHI3 , GIS2 , PSK2 , GCD1 , RQC2
ribosomal subunit export from nucleus_GO:0000054	8.06989	15	46	0.00948868	0.0237217	OVER	NUG1 , ARB1 , LSG1 , CRM1 , SDA1 , RPF1 , NOP9 , NUP85 , LTV1 , RIX7 , RNA1 , RPS3 , NOG2 , NOG1 , MEX67
protein dephosphorylation_GO:0006470	8.59619	15	49	0.0174616	0.0413563	OVER	SPO7 , GIP4 , PTC4 , SAT4 , PTP1 , REF2 , PTP3 , GLC7 , PPT1 , HAL5 , ESS1 , SIW14 , PSY2 , RTS1 , GIP3
peptidyl-amino acid modification_GO:0018193	26.4903	37	151	0.0177999	0.0414309	OVER	ACS1 , NUP60 , RKM3 , TAF5 , PAF1 , CDC7 , UBA2 , DOT1 , ADA2 , RMT2 , HAT2 , PKP2 , TAF6 , RTF1 , SWC4 , SPT6 , GCN5 , ARD1 , SET1 , SET5 , PKP1 , OST1 , ESS1 , SWD2 , YPK1 , CTK1 , BRE2 , BUR2 , YPK2 , MCK1 , MDM20 , CTR9 , SPT20 , ESA1 , IPL1 , NAT3 , SGV1
RNA catabolic process_GO:0006401	23.1571	33	132	0.0182931	0.0418571	OVER	RPT2 , POL3 , AIR2 , SUP35 , RNH202 , TPA1 , XRN1 , RAI1 , POP6 , SKI6 , NMD2 , LRP1 , RTT101 , MTR4 , JSN1 , JHD2 , PAN3 , PUF3 , SIR3 , RNT1 , DOM34 , WHI3 , NRD1 , TRF5 , PAP2 , RRP6 , SKI7 , DCS2 , NAB3 , NOT5 , DBF20 , MMS1 , SKI3
protein alkylation_GO:0008213	8.77162	15	50	0.0210238	0.0473037	OVER	RKM3 , PAF1 , NOP1 , DOT1 , RMT2 , RTF1 , SPT6 , SET1 , SET5 , ESS1 , SWD2 , BRE2 , BUR2 , CTR9 , SGV1

## Sheet: (3) mRNAs with rare R codons 
GO-terms enriched within the 500 top rare Arg-codon containing mRNAs
PATH	ExpectedHitsInPATH	NumHitsInPATH	TotInPATH	RawPvalue	AdjPvalue	Represented	SigsInPath
Aggregated more in not4Δ than in not4Δpuf3Δ	95.7633	142	764	4.86847e-08	1.37121e-07	OVER	ASK10 , CUL3 , PSY2 , TOM1 , TFC4 , BUD4 , SLA2 , OSH3 , PEP3 , MDS3 , ECM2 , GIS1 , INP52 , URB1 , GPR1 , PTC4 , PRR1 , ECM30 , BOI2 , SNU114 , ARH1 , PIF1 , SFB3 , ESA1 , CDC24 , YML119W , SGD1 , KIN3 , YKL023W , PIB2 , YOR1 , HUL5 , BUD27 , SEA4 , IPI1 , HOS2 , GRC3 , FMP27 , VPS41 , RDH54 , YGL185C , MON2 , MUK1 , YTA7 , RIM101 , TRS120 , ALK2 , SPT20 , SIN3 , STT4 , VPS33 , MFG1 , GIP3 , YSC…
mitotic cell cycle_GO:0000278	28.7039	52	229	7.40914e-06	1.97792e-05	OVER	TOM1 , BUD9 , BUD4 , SLA2 , CLB4 , FKH2 , BRN1 , ULP1 , CDC24 , RAX2 , HSL7 , SLD2 , ASE1 , RAX1 , TOP2 , MBP1 , SPA2 , SAP155 , MAD1 , RIM101 , ALK2 , SIN3 , SFG1 , AMN1 , BUD3 , HSL1 , BUD2 , BRE1 , ACE2 , SWI6 , CNM67 , SPC98 , THP1 , CDC5 , SPC110 , KIP3 , NUD1 , POL2 , BNI4 , MYO3 , KIN4 , BUD7 , ALK1 , BUB2 , CBF2 , AIM44 , FIN1 , GRR1 , PKC1 , BNI1 , FAR11 , SRC1
cytoskeleton organization_GO:0007010	22.8127	39	182	0.000394126	0.000909749	OVER	BUD4 , SLA2 , SSK1 , CLB4 , CDC24 , SPC97 , ASE1 , SCD5 , AKL1 , SPA2 , YSC84 , SHE4 , SPC29 , POM152 , BEM2 , BUD14 , CNM67 , KIP2 , SPC98 , CDC5 , SPC110 , KIP3 , NUD1 , NDC1 , SAC7 , NDC80 , SPC25 , GEA1 , ENT4 , MLP2 , MYO1 , CBF2 , FIN1 , LSB5 , PKC1 , BNI1 , MHP1 , NUM1 , IQG1
RNA splicing_GO:0008380	12.7852	25	102	0.000574753	0.00130703	OVER	PET54 , ECM2 , CLF1 , SNU114 , PRP40 , CCM1 , CBP2 , PRP46 , SPT20 , MUD2 , RSE1 , SYF1 , SLU7 , PRP6 , USA1 , MRN1 , PRP8 , MRS1 , PRP9 , LUC7 , BRR2 , PRP21 , YSH1 , HSH155 , PRP39
cytokinesis_GO:0000910	8.89947	19	71	0.000834463	0.00186993	OVER	BUD9 , BUD4 , SLA2 , CDC24 , RAX2 , RAX1 , SPA2 , RIM101 , BUD3 , BUD2 , BUD14 , THP1 , BNI4 , MYO3 , BUD7 , MYO1 , AIM44 , PKC1 , BNI1
organelle fission_GO:0048285	20.6819	35	165	0.000948438	0.00209475	OVER	PSY2 , TOM1 , DSN1 , CLB4 , RAD52 , BRN1 , MSH6 , CDC24 , ASE1 , HOS2 , RDH54 , TOP2 , MAD1 , RIM101 , ALK2 , AMN1 , BUD2 , BRE1 , SWI6 , CNM67 , SPC98 , CDC5 , PAP2 , SPC110 , KIP3 , NUD1 , SET3 , POL2 , KIN4 , ALK1 , BUB2 , CBF2 , FIN1 , NUM1 , SRC1
regulation of DNA metabolic process_GO:0051052	8.77413	18	70	0.00186716	0.00398068	OVER	PSY2 , FKH2 , MSH6 , PIF1 , HST1 , IPI1 , TOP2 , SIN3 , RAD3 , CTI6 , BRE1 , SUM1 , SWI6 , UFD4 , PAP2 , DEP1 , FOB1 , CHD1
DNA recombination_GO:0006310	10.4036	20	83	0.00249282	0.00524176	OVER	RAD52 , PIF1 , SLD2 , HST1 , RDH54 , TOP2 , RAD3 , BRE1 , NMD2 , SWI6 , NAM7 , CDC5 , PAP2 , THO2 , FOB1 , HPR1 , POL2 , SNF2 , IRC8 , MCM7
endocytosis_GO:0006897	9.77689	19	78	0.00277817	0.00580203	OVER	SLA2 , OSH3 , SCD5 , AKL1 , MON2 , VPS33 , AKR1 , YSC84 , DNF1 , LDB19 , ROD1 , SWH1 , YAP1801 , ENT4 , MYO3 , DRS2 , OSH2 , ECM21 , LSB5
mRNA processing_GO:0006397	16.6708	28	133	0.00337575	0.00690903	OVER	ECM2 , CLF1 , SEN1 , SNU114 , PRP40 , FIR1 , PRP46 , SPT20 , MUD2 , RSE1 , SYF1 , THP1 , SLU7 , PRP6 , USA1 , THO2 , MRN1 , PRP8 , PRP9 , LUC7 , HPR1 , PFS2 , BRR2 , CFT1 , PRP21 , YSH1 , HSH155 , PRP39
pseudohyphal growth_GO:0007124	6.01655	13	48	0.00483339	0.0096354	OVER	OSH3 , MDS3 , STE12 , FKH2 , GPR1 , CDC39 , SPA2 , SFG1 , TMN3 , GPB2 , MSN1 , DIG1 , MKS1
DNA replication_GO:0006260	12.5345	22	100	0.00517568	0.0101855	OVER	FKH2 , BRN1 , MSH6 , CLF1 , SEN1 , PIF1 , SLD2 , IPI1 , TOP2 , SIN3 , CTI6 , BRE1 , MIP1 , SUM1 , POL3 , POL1 , DEP1 , FOB1 , CHD1 , POL2 , SNF2 , MCM7
chromosome segregation_GO:0007059	14.4146	24	115	0.00720415	0.013823	OVER	DSN1 , BRN1 , IOC3 , KIN3 , ESC8 , ASE1 , RDH54 , MAD1 , GIP3 , BUD2 , CDC5 , SPC110 , KIP3 , NUD1 , FOB1 , NDC80 , POL2 , SPC25 , KIN4 , BUB2 , NNF1 , CBF2 , FIN1 , SRC1
exocytosis_GO:0006887	5.13913	11	41	0.00997341	0.0187843	OVER	SLA2 , OSH3 , PEP3 , KIN1 , SEC6 , KIN2 , GYL1 , SWH1 , MYO3 , SEC3 , OSH2
mitochondrial genome maintenance_GO:0000002	3.25896	8	26	0.0114767	0.021225	OVER	HSP78 , RAD52 , PIF1 , CCM1 , MIP1 , PIM1 , MRS1 , YME2
mitochondrial DNA metabolic process_GO:0032042	0.626723	3	5	0.0161085	0.0289199	OVER	RAD52 , MIP1 , PIM1
conjugation_GO:0000746	9.90223	17	79	0.0163535	0.0291891	OVER	OSH3 , STE12 , PRR1 , CDC39 , MSG5 , SPA2 , AKR1 , BUD3 , DNF1 , SPC110 , SPT7 , ROD1 , CNA1 , DRS2 , GRR1 , FAR11 , FPK1
regulation of transport_GO:0051049	8.39809	15	67	0.0164999	0.0292802	OVER	ASK10 , PEP3 , VPS41 , AKL1 , MSG5 , VPS33 , AKR1 , SEC6 , BUD14 , LDB19 , GYL1 , ROD1 , UBR1 , VAM6 , FPK1
regulation of organelle organization_GO:0033043	21.1833	31	169	0.0167987	0.029639	OVER	PSY2 , PET54 , SSK1 , CLB4 , PEP3 , PIF1 , CDC24 , CDC39 , HOS2 , VPS41 , SPA2 , MAD1 , VPS33 , AMN1 , SEC6 , BUD2 , BUD14 , SWI6 , KIP2 , CDC5 , KIP3 , SET3 , SAC7 , BDF1 , KIN4 , BUB2 , FIN1 , ENV7 , VAM6 , BNI1 , MHP1
chromatin organization_GO:0006325	31.5869	43	252	0.0188005	0.0324255	OVER	FKH2 , GIS1 , OAF1 , IOC3 , TRA1 , ESA1 , ESC8 , HST1 , HOS2 , TOP2 , SWC5 , YTA7 , SPT20 , SIN3 , MSN2 , VPS71 , EAF7 , CTI6 , BRE1 , SUM1 , ITC1 , NAM7 , NGG1 , MRN1 , HDA2 , SPT7 , DEP1 , SET3 , FOB1 , CHD1 , AHC1 , POL2 , SNF2 , BDF1 , ISW2 , MLP1 , PHO4 , GCN5 , CAC2 , RSC1 , MCM7 , NUP120 , HST3
histone modification_GO:0016570	10.905	18	87	0.0202507	0.0347316	OVER	GIS1 , TRA1 , ESA1 , HST1 , HOS2 , SPT20 , SIN3 , EAF7 , BRE1 , NGG1 , HDA2 , SPT7 , DEP1 , SET3 , CHD1 , AHC1 , GCN5 , HST3
signaling_GO:0023052	20.6819	30	165	0.0207527	0.0351993	OVER	ACK1 , PSY2 , KOG1 , SSK1 , MDS3 , GPR1 , BOI2 , CDC24 , SEA4 , HOS2 , LCB3 , MSG5 , SPT20 , DFM1 , AKR1 , BEM2 , PDE2 , GPB2 , CYR1 , SAC7 , ROD1 , CNA1 , YOS9 , TIP41 , SYG1 , LCB5 , PKC1 , VAM6 , FAR11 , MKS1
regulation of cell cycle_GO:0051726	18.551	27	148	0.0263203	0.0436775	OVER	PSY2 , CLB4 , FKH2 , ESA1 , CDC24 , HSL7 , CDC39 , SLD2 , HOS2 , TOP2 , MAD1 , RIM101 , AMN1 , HSL1 , BUD2 , BRE1 , BUD14 , SWI6 , CDC5 , KIP3 , SET3 , POL2 , KIN4 , BUB2 , FIN1 , GRR1 , FAR11
cell budding_GO:0007114	6.01655	11	48	0.0317795	0.0516207	OVER	BUD4 , SLA2 , BOI2 , TAO3 , SPA2 , TGL3 , BUD3 , TGL4 , BUD2 , MYO3 , BNI1
meiotic cell cycle_GO:0051321	15.2921	22	122	0.0473036	0.0756365	OVER	PSY2 , DSN1 , RAD52 , MSH6 , HOS2 , RDH54 , TOP2 , RIM101 , ALK2 , SIN3 , VPS13 , BRE1 , SWI6 , GPB2 , CDC5 , PAP2 , POL1 , NUD1 , SET3 , CHS3 , MSS4 , VPS54
cell wall organization or biogenesis_GO:0071554	15.2921	22	122	0.0473036	0.0756365	OVER	YEA4 , ACK1 , SLA2 , YUR1 , MSG5 , RIM101 , KTR7 , YEH2 , CHS6 , SAC7 , CNA1 , CHS3 , YPS7 , SBE2 , BCH2 , FLC1 , MYO3 , ROT2 , BUD7 , VPS54 , PKC1 , MHP1
All Puf3 core targets	61.2936	73	489	0.0533508	0.0844263	OVER	PSY2 , TOM1 , BUD4 , HSP78 , YNR040W , RSM22 , TRA1 , ARH1 , MSY1 , BUL2 , COX10 , YDR061W , HOS2 , YMR210W , SNF12 , CCM1 , YMR144W , MCP2 , CBP2 , PRP46 , OMS1 , MRP20 , NAR1 , STE6 , YCR023C , YPR109W , SFG1 , COX18 , AEP1 , VPS71 , MTC3 , AIM39 , MRF1 , BEM2 , LRO1 , PDE2 , OXP1 , YMR102C , PIM1 , THP1 , RMD8 , PRP6 , ATP23 , SPC110 , YER077C , PRP8 , MET7 , MRS1 , SPT7 , MRH4 , CHD1 , SHY1 ,…
