# Supplementary material
Source: HighWire-hosted journal article supplement (doi:10.1101/rna.080953.126)
Supplement: SupplementalTableS5.xlsx [file SupplementalTableS5.xlsx]

## Sheet: (1) Interactome wildtype
Interactome wild type
Symbol	log2FC_tt_Puf3_vs_NoTag	AveExpr	t	P.Value	adj.P.Val	B
Puf3_TAP	12.6457	21.5926	29.5797	3.19718e-10	6.26967e-07	11.8687
STE20	7.07034	21.708	16.2727	6.05707e-08	5.93896e-05	8.57008
ELP4	4.75822	15.7756	14.1987	1.96406e-07	0.000128384	7.61923
RRM3	3.875	16.3532	10.831	1.95164e-06	0.000956793	5.59249
PAB1	4.12514	23.1049	10.1393	3.3796e-06	0.00123535	5.08028
AEP2	4.71469	16.4996	9.92979	4.01643e-06	0.00123535	4.9174
YGR250C	5.15452	16.1775	9.59298	5.33647e-06	0.00123535	4.64746
HEK2	4.07565	19.3986	9.49509	5.80508e-06	0.00123535	4.56709
RMD9	3.85776	17.3741	9.42201	6.18448e-06	0.00123535	4.50651
MRPL28	3.4293	17.271	9.09297	8.26693e-06	0.00123535	4.22753
NAM7	4.26945	18.2589	8.93543	9.52856e-06	0.00123535	4.09025
MRPL51	3.42915	17.1819	8.93472	9.53464e-06	0.00123535	4.08963
TIF4632	3.20514	16.8507	8.87908	1.00301e-05	0.00123535	4.04055
IRC19	5.05917	16.4641	8.86903	1.01226e-05	0.00123535	4.03165
AEP1	3.8958	16.5363	8.84371	1.03597e-05	0.00123535	4.00919
SMD1	3.27116	16.9744	8.81998	1.05876e-05	0.00123535	3.98807
MRPL13	3.66342	17.6797	8.76131	1.1175e-05	0.00123535	3.93563
ATP25	4.67032	16.192	8.6002	1.29807e-05	0.00123535	3.7898
RPM2	5.08017	17.0451	8.57761	1.32585e-05	0.00123535	3.76914
MRPL10	3.59552	16.5566	8.56896	1.33666e-05	0.00123535	3.76121
PKC1	2.82781	15.6235	8.45878	1.48325e-05	0.00123535	3.65954
PBP4	3.09878	18.7367	8.40766	1.55718e-05	0.00123535	3.61194
RRG1	5.03943	16.3247	8.40632	1.55917e-05	0.00123535	3.61069
SPT3	3.10699	14.7812	8.39951	1.56933e-05	0.00123535	3.60433
MRPL9	3.26733	17.2778	8.31325	1.7046e-05	0.00123535	3.52328
SLF1	3.54301	16.998	8.28613	1.74973e-05	0.00123535	3.49764
MRP7	3.90113	16.3712	8.27723	1.76483e-05	0.00123535	3.4892
TIF4631	2.98216	19.8536	8.25989	1.79468e-05	0.00123535	3.47273
CUS1	3.1842	16.6876	8.18662	1.92697e-05	0.00123535	3.40283
STO1	3.19811	18.5025	8.18099	1.93757e-05	0.00123535	3.39743
MSL5	2.92366	15.1266	8.09554	2.10661e-05	0.00123535	3.31509
UTP22	2.78539	19.474	8.03522	2.23565e-05	0.00123535	3.25647
FCP1	3.27416	14.6457	8.03265	2.24134e-05	0.00123535	3.25397
NSE3	3.61835	14.8846	8.0291	2.24922e-05	0.00123535	3.2505
TRS31	2.9002	16.5196	8.00311	2.30787e-05	0.00123535	3.2251
YBR238C	3.36754	14.9947	7.94893	2.43562e-05	0.00123535	3.17189
MRPL33	4.18959	16.4019	7.94697	2.44039e-05	0.00123535	3.16996
EAF1	3.24652	15.3733	7.92979	2.48259e-05	0.00123535	3.15302
MRPL4	3.6562	17.0041	7.91704	2.51441e-05	0.00123535	3.14043
RRG8	4.19106	16.3948	7.91489	2.51984e-05	0.00123535	3.13829
NAB2	2.96328	17.9781	7.88475	2.59707e-05	0.00124216	3.10844
SGN1	5.06668	16.6181	7.84457	2.70412e-05	0.00126257	3.06846
EAP1	3.43728	17.898	7.79049	2.8559e-05	0.00130242	3.01437
MKT1	2.77971	17.3312	7.74438	2.99273e-05	0.00133381	2.96797
TCO89	2.80432	14.4551	7.64414	3.31569e-05	0.00142101	2.86623
PAT1	2.66091	18.3072	7.62177	3.39287e-05	0.00142101	2.84336
HRR25	3.81377	18.3528	7.61807	3.40579e-05	0.00142101	2.83958
MRPL7	2.81294	16.4194	7.55537	3.63378e-05	0.00148455	2.77513
RML2	3.07674	16.0999	7.47599	3.94667e-05	0.00151945	2.69287
MRPL35	2.99949	17.9305	7.46124	4.00803e-05	0.00151945	2.67749
SBE22	3.31725	15.0339	7.44445	4.07912e-05	0.00151945	2.65996
SBP1	2.95023	21.8115	7.42587	4.15942e-05	0.00151945	2.64052
MRPL36	3.58859	15.8178	7.3837	4.34815e-05	0.00151945	2.59624
ZDS2	3.28684	14.5274	7.37221	4.40122e-05	0.00151945	2.58413
IMG2	3.07384	16.5033	7.36258	4.44622e-05	0.00151945	2.57397
PUS1	3.45129	16.9754	7.35806	4.46748e-05	0.00151945	2.56921
TES1	2.97529	16.4987	7.35502	4.48189e-05	0.00151945	2.56599
NAT3	2.54867	16.7337	7.33506	4.57762e-05	0.00151945	2.54488
MRM1	2.59499	15.3387	7.33092	4.59772e-05	0.00151945	2.54051
DUS3	2.45255	16.7927	7.32046	4.64902e-05	0.00151945	2.52942
SIR4	4.07509	18.6139	7.2806	4.85038e-05	0.00155658	2.48704
LSM1	2.99494	17.057	7.25214	4.99992e-05	0.00155658	2.45667
PRI2	3.26971	15.6057	7.25199	5.00075e-05	0.00155658	2.4565
YIL055C	2.93924	15.2211	7.21138	5.22307e-05	0.00156494	2.41297
MRPS35	2.94969	15.4851	7.20516	5.25801e-05	0.00156494	2.4063
PRP40	3.23037	15.2727	7.19205	5.33263e-05	0.00156494	2.39219
LSM4	2.41524	18.5404	7.18958	5.34682e-05	0.00156494	2.38953
THP2	3.15798	16.1995	7.14112	5.63362e-05	0.00162129	2.33718
NAM9	3.07944	15.8223	7.12026	5.76228e-05	0.00162129	2.31455
RBS1	3.2492	14.7967	7.10333	5.86903e-05	0.00162129	2.29615
CCM1	3.11822	15.5793	7.07979	6.02105e-05	0.00162129	2.2705
YGR054W	2.23496	17.2547	7.05267	6.2016e-05	0.00162129	2.24085
VPS41	2.42785	16.542	7.04808	6.23275e-05	0.00162129	2.23583
YML119W	3.44667	15.7785	7.03928	6.29287e-05	0.00162129	2.22619
HCS1	2.71556	13.8887	7.02322	6.4044e-05	0.00162129	2.20855
ETP1	3.39722	14.1561	7.02092	6.42049e-05	0.00162129	2.20603
MRPL3	3.6113	17.9531	7.00582	6.52754e-05	0.00162129	2.18943
RNA15	3.03394	16.3171	7.00458	6.53646e-05	0.00162129	2.18806
YDR239C	2.30403	15.0358	7.00444	6.53743e-05	0.00162129	2.18791
MRPL1	3.67262	16.7537	6.99381	6.61412e-05	0.00162129	2.17619
MHR1	2.81696	16.7768	6.96137	6.85428e-05	0.00163019	2.14036
GAL83	3.47813	14.6904	6.96054	6.86052e-05	0.00163019	2.13944
XRN1	2.59859	19.5353	6.95535	6.89984e-05	0.00163019	2.1337
FAB1	2.62363	15.3913	6.89944	7.33961e-05	0.00171345	2.07157
NOP12	2.24071	19.0282	6.87266	7.56101e-05	0.00174374	2.04167
PAP2	3.19063	15.4404	6.85268	7.73094e-05	0.00174374	2.0193
RGR1	2.3495	16.5913	6.84895	7.76313e-05	0.00174374	2.01512
SGF73	2.84097	15.6681	6.84182	7.82504e-05	0.00174374	2.00712
MNN11	2.96223	19.2678	6.77773	8.4067e-05	0.00185231	1.9349
MRPL11	3.13426	16.9526	6.74982	8.67465e-05	0.00189011	1.90328
ELP3	2.69121	17.7807	6.73804	8.79044e-05	0.00189429	1.88991
RRB1	3.08875	18.4868	6.68976	9.28332e-05	0.00196445	1.83488
SRB7	3.22021	15.34	6.68255	9.35949e-05	0.00196445	1.82664
PBY1	2.54259	16.7265	6.67719	9.41652e-05	0.00196445	1.82051
GFD1	2.66543	14.8396	6.65523	9.65429e-05	0.00199285	1.79534
NGG1	2.98633	15.8585	6.62651	9.97523e-05	0.00203765	1.76232
RPB2	2.1728	18.697	6.60733	0.00010196	0.00204108	1.74021
SNU71	2.98669	16.7209	6.58632	0.00010444	0.00204108	1.71593
ESA1	3.38613	14.6632	6.55563	0.000108183	0.00204108	1.68035
MRPL24	3.14762	15.9134	6.54521	0.000109486	0.00204108	1.66824
SKI2	2.59087	16.9234	6.53867	0.000110313	0.00204108	1.66064
PUF2	3.0586	15.5116	6.53469	0.00011082	0.00204108	1.656
GPB1	2.27639	15.6943	6.53421	0.000110882	0.00204108	1.65544
SQS1	2.67056	16.4842	6.53137	0.000111244	0.00204108	1.65214
MLC1	3.24848	18.9516	6.52766	0.000111721	0.00204108	1.64781
CBC2	2.35768	18.4851	6.52691	0.000111817	0.00204108	1.64694
NRD1	2.86379	16.1865	6.52528	0.000112028	0.00204108	1.64504
TCB3	2.32914	16.4875	6.52232	0.00011241	0.00204108	1.64159
RBG1	2.19821	17.9201	6.50325	0.000114912	0.00204554	1.61933
STT4	2.37191	16.4817	6.48559	0.000117283	0.00204554	1.59867
TOR2	3.35927	15.9762	6.48525	0.000117328	0.00204554	1.59828
TRS130	3.79374	15.1171	6.48363	0.000117549	0.00204554	1.59638
TYW1	2.04388	15.0846	6.48126	0.000117872	0.00204554	1.5936
IKI3	2.13117	17.584	6.46175	0.000120568	0.00207196	1.57071
TMA46	2.35228	17.4323	6.44853	0.000122432	0.00207196	1.55518
YKL075C	2.21544	15.376	6.44761	0.000122564	0.00207196	1.5541
TCB1	2.88234	14.938	6.42963	0.000125154	0.00209767	1.53292
HSH49	3.72746	16.0812	6.41019	0.000128021	0.00211074	1.50999
NPR3	2.56703	15.3638	6.39997	0.000129558	0.00211074	1.4979
SIS1	2.30716	20.3903	6.39715	0.000129985	0.00211074	1.49457
SDO1	2.00462	16.0204	6.39548	0.000130239	0.00211074	1.49259
PUS7	2.14051	16.9646	6.37332	0.000133661	0.00214843	1.46632
ELP2	2.94028	16.8801	6.35089	0.000137223	0.00218775	1.43967
MDM20	2.55555	17.4327	6.33876	0.000139192	0.00220126	1.42523
MOT2	3.08881	15.9269	6.31946	0.000142389	0.0022338	1.40221
RTC1	2.85258	15.2369	6.26138	0.000152504	0.00232859	1.3326
SHE3	2.01989	15.7192	6.25939	0.000152865	0.00232859	1.3302
MRPL23	3.04002	16.5949	6.25863	0.000153003	0.00232859	1.32929
POL31	2.88326	14.9515	6.23955	0.000156506	0.00232859	1.30632
MTR4	2.28469	17.7475	6.2301	0.000158274	0.00232859	1.29492
NAM8	2.22769	15.2284	6.22722	0.000158818	0.00232859	1.29144
TRS20	3.02396	15.1713	6.22433	0.000159365	0.00232859	1.28795
MNN1	2.64178	15.1671	6.22137	0.000159927	0.00232859	1.28437
LSM6	2.195	17.1501	6.21871	0.000160434	0.00232859	1.28116
RIF1	2.34286	14.9043	6.21847	0.000160479	0.00232859	1.28087
LUC7	2.56914	15.0248	6.21318	0.000161494	0.00232859	1.27448
NOP4	2.04999	18.7594	6.19902	0.000164243	0.00234953	1.25734
LRP1	2.00971	15.5786	6.19344	0.000165342	0.00234953	1.25057
DED1	2.24328	19.6146	6.17928	0.000168162	0.00237241	1.23339
HSP42	2.78388	18.1012	6.14284	0.000175666	0.00244516	1.18905
HFI1	3.07304	16.0731	6.13902	0.000176475	0.00244516	1.18438
RNQ1	3.0016	21.1515	6.13064	0.00017826	0.00244516	1.17416
CHS5	2.03647	17.7115	6.13042	0.000178306	0.00244516	1.17389
ESF2	1.96351	16.9384	6.11551	0.000181534	0.00247214	1.15566
MHP1	2.12682	15.0464	6.08805	0.000187645	0.00253738	1.12201
NAB6	2.07314	18.5403	6.07765	0.000190018	0.00253738	1.10923
SMB1	2.12929	16.2666	6.07098	0.000191556	0.00253738	1.10104
FAR8	3.10342	14.7547	6.06787	0.000192277	0.00253738	1.09722
MBF1	2.4304	18.6281	6.06565	0.000192794	0.00253738	1.09448
SNF6	2.75013	16.2736	6.05995	0.00019413	0.00253793	1.08746
MRN1	2.4443	18.7124	6.02921	0.000201507	0.00261692	1.04953
YHM2	2.43966	16.9016	6.00563	0.000207371	0.00267536	1.02035
CUE3	2.77763	17.3573	5.99099	0.000211103	0.00270571	1.0022
SPT8	2.47091	16.2622	5.97374	0.000215598	0.00274538	0.980754
PSP2	2.24247	15.5937	5.95201	0.000221408	0.00278402	0.953687
ARO1	2.72885	19.2746	5.94684	0.000222817	0.00278402	0.947227
VPS34	2.38877	15.1266	5.94656	0.000222892	0.00278402	0.946886
BRR1	2.56433	15.7075	5.93704	0.000225511	0.0027989	0.934995
MUD2	2.18411	15.2154	5.91976	0.000230347	0.00283801	0.913387
SSE2	2.21483	17.2364	5.91551	0.000231556	0.00283801	0.908057
DEP1	2.45496	15.9397	5.9078	0.000233761	0.00284724	0.898403
STE11	2.11669	16.066	5.89311	0.00023803	0.00288134	0.87997
SRB4	2.41324	16.1202	5.8769	0.000242841	0.00289971	0.859585
RPO21	1.80775	18.3694	5.87066	0.00024472	0.00289971	0.851735
POL1	2.88982	17.6328	5.86926	0.000245145	0.00289971	0.849966
HSH155	2.67325	16.6706	5.86821	0.000245462	0.00289971	0.848649
PBP2	2.47916	17.0649	5.84601	0.000252302	0.00296265	0.820644
LEO1	2.50464	16.2281	5.84004	0.000254177	0.00296691	0.813098
GCD14	3.22851	16.7913	5.83099	0.000257046	0.00298265	0.801656
RPL26B	2.12309	21.2286	5.81725	0.00026147	0.0030018	0.784264
WHI4	4.22619	15.1843	5.81636	0.000261758	0.0030018	0.78314
NGR1	2.05269	15.6275	5.80608	0.000265128	0.00302277	0.770101
IRC25	2.53337	15.8027	5.7971	0.000268108	0.00303907	0.758707
ESF1	1.86794	18.6894	5.79002	0.000270486	0.0030484	0.749704
MRPL20	2.22107	18.5971	5.78531	0.000272079	0.00304884	0.743714
PET54	3.11516	15.9905	5.76871	0.000277776	0.00308012	0.722583
EDC3	2.48495	18.4725	5.76642	0.000278571	0.00308012	0.719667
DCP2	2.65513	18.4544	5.75969	0.000280927	0.00308012	0.711079
RTT101	2.58759	15.3086	5.75905	0.000281153	0.00308012	0.71026
MSC6	2.59247	16.1414	5.75404	0.000282918	0.00308223	0.703877
PET127	3.88134	16.3939	5.74609	0.000285749	0.00309587	0.693722
SRO7	2.33632	16.4554	5.73608	0.000289357	0.00311775	0.68092
POL12	2.46133	17.0655	5.72881	0.000292008	0.00312911	0.671619
PAN2	2.56298	14.4799	5.71819	0.000295928	0.00314145	0.658014
LYS12	2.64925	20.3529	5.71159	0.000298395	0.00314145	0.649543
RQT4	2.7283	17.292	5.70739	0.000299973	0.00314145	0.644161
DBP2	1.84754	18.0873	5.7059	0.000300535	0.00314145	0.642252
SUB1	1.94141	16.9121	5.70229	0.000301905	0.00314145	0.63761
LEA1	2.46859	15.705	5.70001	0.000302771	0.00314145	0.634689
ARD1	2.55954	15.5348	5.69468	0.000304812	0.00314598	0.627833
DPB4	2.28621	17.0859	5.67229	0.000313541	0.00321913	0.599016
NUP192	2.22238	16.2578	5.65965	0.000318587	0.00324581	0.58272
GCN5	2.54052	15.0542	5.65291	0.000321315	0.00324581	0.574016
MDH3	1.9325	17.9557	5.65094	0.000322118	0.00324581	0.571469
RDH54	3.17081	15.6582	5.64937	0.00032276	0.00324581	0.569436
UBP8	2.5144	14.7696	5.63222	0.00032985	0.00330018	0.547253
MUD1	3.14533	15.7777	5.62059	0.000334753	0.00332261	0.532186
BIM1	1.96604	16.8003	5.61888	0.00033548	0.00332261	0.529972
MDJ1	2.01679	18.3298	5.61137	0.000338695	0.00333759	0.520232
EFR3	2.24081	15.7269	5.6063	0.000340885	0.00334237	0.513652
PRP42	2.09866	15.7712	5.59579	0.000345475	0.00337053	0.49999
PPZ1	1.82737	15.4421	5.59166	0.000347299	0.00337155	0.494612
UBR1	1.88296	15.9354	5.5871	0.000349321	0.00337447	0.488685
TFB1	2.40163	15.7046	5.57951	0.000352718	0.00338106	0.478799
BFR1	2.21775	19.8927	5.57788	0.000353451	0.00338106	0.476678
ADA2	2.2215	14.9365	5.57002	0.000357015	0.00339857	0.466431
MRPL15	3.1386	18.0883	5.53628	0.000372757	0.00353128	0.422349
IMP4	1.94881	17.6255	5.52301	0.000379153	0.00357461	0.404965
NPL3	1.92516	19.6688	5.50424	0.000388404	0.003619	0.38033
SEA4	2.16385	17.3115	5.50299	0.00038903	0.003619	0.378683
IDP1	2.35688	13.7392	5.50226	0.000389398	0.003619	0.377718
RAD10	2.79004	14.8607	5.48868	0.000396261	0.00366542	0.35986
OSH2	2.16362	15.4615	5.46521	0.000408437	0.0037603	0.328926
SNU114	2.53259	16.0975	5.46081	0.000410764	0.00376405	0.323118
RPA135	1.94967	19.96	5.44597	0.000418723	0.00381914	0.303498
RPC10	2.56573	18.7347	5.4236	0.000431033	0.00391322	0.273871
MEX67	2.11394	16.7901	5.41809	0.000434126	0.00391619	0.26656
SLM5	1.85205	14.6674	5.41346	0.000436743	0.00391619	0.260412
NMD5	1.98274	18.369	5.41231	0.000437395	0.00391619	0.258889
FBP26	2.53975	15.8263	5.40888	0.000439348	0.00391619	0.254331
UFD4	2.16827	18.374	5.37646	0.000458277	0.00405396	0.211188
NOP9	1.70302	18.5475	5.37536	0.000458938	0.00405396	0.209714
IRA2	2.97154	14.7639	5.35412	0.000471836	0.00413188	0.181363
CAD1	3.51953	15.0424	5.35204	0.000473125	0.00413188	0.178572
POL3	1.91357	15.5852	5.35049	0.000474081	0.00413188	0.176507
RRP42	2.08607	16.5251	5.3248	0.000490296	0.00423635	0.142098
NMD2	2.46703	14.7942	5.32466	0.000490388	0.00423635	0.141906
ICT1	2.47258	15.0772	5.31131	0.000499047	0.00429224	0.123997
BRE5	2.80393	15.2418	5.30081	0.000505978	0.00432362	0.109883
SMC5	2.54581	15.505	5.29652	0.000508843	0.00432362	0.104105
CRT10	2.36735	15.0258	5.29408	0.000510473	0.00432362	0.100832
SWP82	1.85238	15.1283	5.29253	0.000511515	0.00432362	0.0987447
ESL1	2.59297	13.9466	5.28883	0.000514016	0.00432612	0.0937535
CDC33	2.46206	20.0134	5.28428	0.000517098	0.00433346	0.0876344
RPL3	1.70211	21.3622	5.27444	0.000523849	0.00434219	0.0743602
RSE1	2.79754	16.9118	5.27246	0.00052522	0.00434219	0.0716856
NAB3	2.87042	16.6614	5.27028	0.000526729	0.00434219	0.0687476
DPB2	2.71654	17.5246	5.26765	0.000528561	0.00434219	0.0651948
MPD1	1.88187	16.242	5.26671	0.000529211	0.00434219	0.0639375
YMR102C	2.25056	15.443	5.26347	0.000531481	0.00434264	0.0595565
IBD2	1.88531	16.1567	5.25257	0.000539186	0.00438732	0.0448231
LHP1	1.83915	18.0629	5.24166	0.000547014	0.00440957	0.0300694
PRP31	1.71228	14.4032	5.24089	0.000547576	0.00440957	0.0290187
GIP3	1.71134	15.4972	5.23938	0.000548667	0.00440957	0.0269813
LYS2	3.10876	14.148	5.23183	0.000554179	0.0044357	0.0167473
INP52	1.87803	15.4068	5.22798	0.00055701	0.00443806	0.0115309
BET3	2.18478	16.9669	5.22529	0.000559	0.00443806	0.0078799
MRPL8	1.81806	16.3025	5.21824	0.000564245	0.00446163	-0.00168061
SPT6	1.90349	17.9557	5.21216	0.000568816	0.00446755	-0.00994015
RFC5	1.97379	17.6957	5.21082	0.00056983	0.00446755	-0.0117639
APL3	1.90227	16.9291	5.20626	0.000573287	0.00446755	-0.0179557
TRM732	2.12603	15.1802	5.20007	0.000578022	0.00446755	-0.0263776
LYS20	2.23176	17.3475	5.19819	0.000579463	0.00446755	-0.0289279
SRO9	1.59518	21.5386	5.19664	0.000580663	0.00446755	-0.0310459
KIN2	2.45509	15.3385	5.19628	0.000580941	0.00446755	-0.0315361
MMS1	2.51147	15.8416	5.18852	0.000586964	0.00449624	-0.0420973
RPD3	1.94963	17.6261	5.17	0.000601615	0.00459053	-0.0673409
NUT2	2.18478	16.2171	5.16609	0.00060476	0.00459664	-0.0726803
RXT2	2.22442	16.7393	5.16087	0.000608986	0.00460882	-0.0798126
YMR130W	1.84029	16.2789	5.15681	0.00061229	0.00460882	-0.0853527
ERV41	1.97324	16.1067	5.15544	0.000613413	0.00460882	-0.0872296
RTT10	2.51969	15.5745	5.14386	0.000622977	0.00466281	-0.103073
MRPS28	2.58154	15.2216	5.13242	0.000632579	0.00469402	-0.118739
LMO1	2.67191	15.5326	5.13067	0.000634065	0.00469402	-0.121142
EPL1	2.08708	15.4912	5.12361	0.000640088	0.00469402	-0.130825
SOV1	2.06929	16.5355	5.12201	0.00064146	0.00469402	-0.133018
MRD1	1.72723	17.8494	5.1208	0.000642501	0.00469402	-0.134678
RPS19A	1.84442	21.6943	5.12051	0.000642751	0.00469402	-0.135078
RAD3	1.87044	17.6135	5.11917	0.000643902	0.00469402	-0.136909
SPT7	2.23528	16.377	5.11609	0.00064657	0.00469601	-0.141144
VAC14	1.7798	17.0009	5.11056	0.000651382	0.00471351	-0.14874
UTP4	2.07399	17.8198	5.09434	0.000665716	0.00479952	-0.171035
BFR2	2.03286	17.4718	5.08854	0.000670929	0.00480832	-0.179025
SIP5	1.87921	15.6151	5.08414	0.000674912	0.00480832	-0.185089
UBR2	1.99482	14.6629	5.0807	0.00067804	0.00480832	-0.189825
RKR1	1.81743	16.6116	5.08033	0.000678379	0.00480832	-0.190338
ORC1	1.83051	16.2755	5.0772	0.000681239	0.00480832	-0.194647
UTP14	1.72337	17.5018	5.07407	0.000684122	0.00480832	-0.198972
HCA4	1.69357	18.5132	5.07274	0.000685342	0.00480832	-0.200799
EMG1	1.82981	18.5404	5.07143	0.000686553	0.00480832	-0.202606
MYO3	1.64097	17.4563	5.06297	0.000694426	0.00484616	-0.214288
RPC19	1.84049	19.5185	5.05854	0.000698592	0.00485015	-0.220415
RCL1	2.32913	17.1994	5.0571	0.000699946	0.00485015	-0.222399
YGL117W	2.62282	15.7691	5.05	0.00070668	0.00487958	-0.232209
ILV6	1.85809	18.0905	5.04161	0.000714733	0.00490293	-0.243818
IML1	2.84426	15.3112	5.04127	0.000715063	0.00490293	-0.24429
RPN12	1.71622	17.0641	5.0381	0.000718132	0.00490682	-0.248678
YIL001W	2.37762	14.9136	5.0265	0.000729496	0.00495392	-0.264765
APL2	2.29302	17.4251	5.02591	0.000730078	0.00495392	-0.265582
RMD8	2.14428	14.0276	5.01999	0.000735946	0.00497652	-0.273784
CBP2	3.61887	15.5281	4.99032	0.000766172	0.0051631	-0.315026
SNP1	1.96372	14.9544	4.98692	0.000769725	0.00516928	-0.319768
VAM6	1.91655	15.0092	4.97994	0.000777058	0.00520072	-0.329484
LDB19	2.02562	14.5217	4.9742	0.000783149	0.00522366	-0.337485
YTA6	2.19334	14.2607	4.96903	0.000788686	0.00524276	-0.344705
MAK5	1.86175	18.008	4.96262	0.000795596	0.00525608	-0.353644
MDM38	2.00695	14.6984	4.9622	0.000796051	0.00525608	-0.35423
TRS65	2.43707	15.7164	4.95239	0.000806769	0.00530897	-0.367936
WRS1	1.81607	16.4181	4.94517	0.000814756	0.00534277	-0.378031
RPS5	1.63831	21.4813	4.9384	0.000822329	0.00534277	-0.387513
RCO1	2.25974	16.2876	4.93827	0.000822476	0.00534277	-0.387696
MRPL49	2.41222	15.081	4.93695	0.000823958	0.00534277	-0.389542
RPL38	1.9955	21.186	4.93556	0.000825527	0.00534277	-0.391491
VPS16	1.78296	16.6068	4.92815	0.000833933	0.00537444	-0.401875
VPS15	2.41911	14.0891	4.92549	0.000836967	0.00537444	-0.405597
SWI1	2.94202	16.0205	4.92255	0.000840338	0.00537444	-0.409716
PRT1	1.6023	20.0121	4.92165	0.000841384	0.00537444	-0.410991
VAR1	2.24143	15.2931	4.9159	0.000848023	0.00539926	-0.419046
MRPL25	2.93356	15.8918	4.91186	0.000852733	0.00540239	-0.424723
ENP2	1.68893	17.4534	4.91076	0.000854024	0.00540239	-0.426273
VTC5	2.25972	13.4435	4.90732	0.000858055	0.00541044	-0.4311
HPR1	2.6147	16.4392	4.89801	0.000869076	0.00542984	-0.444181
IPI1	1.74611	16.038	4.89801	0.000869085	0.00542984	-0.44419
PRO2	2.74436	14.9714	4.89771	0.000869438	0.00542984	-0.444607
SSD1	1.56148	19.1302	4.88849	0.000880515	0.00545598	-0.457583
RPL7B	1.60151	18.6648	4.88835	0.000880679	0.00545598	-0.457774
RPL22B	2.86619	17.33	4.88728	0.000881971	0.00545598	-0.459276
RPL26A	1.5834	21.9661	4.87283	0.000899663	0.00553625	-0.479634
TIF35	1.69206	19.0733	4.87208	0.000900593	0.00553625	-0.480693
ACC1	1.84315	19.8442	4.86711	0.000906776	0.00555684	-0.487706
YDR132C	2.72865	15.2649	4.85228	0.000925487	0.00564696	-0.508642
ACK1	1.61469	14.5046	4.84934	0.000929248	0.00564696	-0.512798
SKI8	1.57424	17.7171	4.84866	0.000930121	0.00564696	-0.513761
TY1B-GR1	1.83956	18.2453	4.84359	0.000936648	0.00566903	-0.52093
RPL30	1.82763	19.5991	4.83923	0.000942297	0.00567519	-0.527093
AKL1	1.92688	15.4404	4.83835	0.000943452	0.00567519	-0.528349
MNN9	1.67055	17.6198	4.83022	0.000954104	0.00572171	-0.539858
RPL16A	1.50793	21.5628	4.82655	0.000958955	0.00573327	-0.545056
PHB2	1.7188	16.182	4.81652	0.000972348	0.00579567	-0.559274
CLU1	1.74795	19.4333	4.81167	0.000978895	0.00580337	-0.566153
RNT1	2.05294	16.9456	4.80826	0.000983538	0.00580337	-0.571003
SVL3	1.5691	16.579	4.80571	0.000987013	0.00580337	-0.574619
GAR1	1.81162	19.5403	4.80568	0.000987053	0.00580337	-0.574661
MRP49	2.44144	17.2774	4.80467	0.000988438	0.00580337	-0.576097
UBX7	3.038	15.3969	4.79494	0.00100186	0.00585776	-0.58992
DCP1	1.96169	18.0934	4.79363	0.00100368	0.00585776	-0.59178
YNL050C	1.46043	16.9221	4.7794	0.00102371	0.00595694	-0.612038
COY1	1.43936	20.7552	4.77106	0.00103563	0.00599885	-0.623913
COP1	1.64587	19.014	4.77009	0.00103703	0.00599885	-0.625291
TIM44	1.59749	15.8574	4.7655	0.00104367	0.00601954	-0.631841
PSP1	1.86898	15.7495	4.76236	0.00104825	0.00602819	-0.636323
SCP160	1.99811	19.897	4.75579	0.00105788	0.0060526	-0.645703
GBP2	1.7657	17.6697	4.75268	0.00106247	0.0060526	-0.650142
YBR225W	2.8113	15.1282	4.75114	0.00106474	0.0060526	-0.652331
BNI4	2.03998	17.5829	4.75108	0.00106484	0.0060526	-0.652421
RPO26	1.73032	17.5989	4.74816	0.00106918	0.0060597	-0.65659
DPB3	3.04144	17.4914	4.74601	0.00107238	0.00606036	-0.659661
SAC6	1.63773	19.9501	4.74281	0.00107718	0.00606996	-0.664233
MRPL17	3.33963	17.6724	4.73764	0.00108498	0.00608093	-0.671628
DBP10	1.72343	15.3595	4.73741	0.00108533	0.00608093	-0.671959
ENT5	1.5217	16.4152	4.72693	0.00110132	0.00613883	-0.686954
SMC6	2.00816	15.3781	4.72654	0.00110192	0.00613883	-0.687516
KGD1	2.17312	17.5125	4.72081	0.00111078	0.00615493	-0.695727
CDC36	2.05751	16.6457	4.72061	0.00111109	0.00615493	-0.696008
HOC1	1.68246	17.3563	4.71749	0.00111595	0.00615803	-0.700482
DBP6	1.56578	17.7602	4.7155	0.00111906	0.00615803	-0.70334
RPL11B	1.64338	22.1908	4.71422	0.00112107	0.00615803	-0.705176
RLI1	1.7057	16.9926	4.7115	0.00112533	0.00615979	-0.709068
TAO3	2.60663	15.5157	4.70927	0.00112885	0.00615979	-0.712271
CLF1	1.99204	14.7837	4.70803	0.00113081	0.00615979	-0.714049
EAF3	2.45773	16.7036	4.70594	0.00113412	0.00616071	-0.717045
SDC1	2.60973	15.4363	4.6966	0.00114906	0.00619841	-0.730463
YML6	2.59624	18.0227	4.69644	0.00114932	0.00619841	-0.730691
HDA2	1.68853	16.5284	4.6952	0.00115133	0.00619841	-0.732478
RTT102	2.20727	16.5756	4.69372	0.00115371	0.00619841	-0.734596
SMC4	1.63724	16.1538	4.6917	0.00115699	0.00619905	-0.737508
RPO41	2.07452	17.5773	4.68784	0.00116327	0.00621024	-0.743055
NST1	3.24809	17.4497	4.68652	0.00116541	0.00621024	-0.744943
UME1	2.04212	16.947	4.67676	0.00118149	0.00623981	-0.758995
EPS1	1.96853	17.2293	4.67477	0.0011848	0.00623981	-0.761862
DRE2	2.07207	14.8968	4.674	0.00118607	0.00623981	-0.762958
SAP155	1.62067	18.3959	4.67369	0.00118659	0.00623981	-0.763412
RPS17B	1.75195	20.8719	4.67353	0.00118687	0.00623981	-0.763648
PRE7	1.77085	16.6254	4.66769	0.00119664	0.00627346	-0.772053
MTG1	1.74444	17.0391	4.66546	0.0012004	0.00627346	-0.77527
TRS33	2.0891	16.0221	4.66325	0.00120413	0.00627346	-0.778447
RPB8	2.64987	18.1285	4.65986	0.00120989	0.00627346	-0.783342
UBP3	1.52974	20.1812	4.65863	0.00121198	0.00627346	-0.785115
HER1	1.45768	17.06	4.65835	0.00121246	0.00627346	-0.785521
DCK1	2.23345	15.7902	4.64988	0.00122699	0.00632288	-0.797731
SHS1	1.48811	17.5031	4.64903	0.00122846	0.00632288	-0.798962
GIC2	1.56321	17.3234	4.63817	0.0012474	0.00640356	-0.814646
NIP1	1.6435	19.0814	4.6359	0.0012514	0.00640732	-0.817929
PCL6	1.98361	15.7475	4.63223	0.00125791	0.00642385	-0.823244
YPL225W	2.11983	17.022	4.62006	0.00127969	0.00651809	-0.84084
ORC6	1.77368	15.1641	4.61242	0.00129359	0.00657182	-0.851915
CHA1	2.02998	20.1828	4.61038	0.00129732	0.00657374	-0.854867
CSL4	1.99632	16.7953	4.60784	0.00130199	0.00658043	-0.858555
CBF5	2.05791	19.628	4.59672	0.00132264	0.00666758	-0.874681
CEF1	2.31139	15.9185	4.5912	0.00133301	0.00670266	-0.882692
MNP1	1.69723	18.368	4.58845	0.00133822	0.00671163	-0.886689
ROX3	2.36351	15.8118	4.585	0.00134479	0.00671432	-0.891708
ACE2	2.58517	15.0748	4.58457	0.0013456	0.00671432	-0.89233
PXP1	2.07767	16.6505	4.5812	0.00135205	0.00672935	-0.897227
PRP11	1.91853	15.9464	4.57871	0.00135682	0.00673602	-0.90084
RRT14	1.85001	16.6873	4.57462	0.00136472	0.0067435	-0.906787
BEM1	1.75187	16.9958	4.57321	0.00136746	0.0067435	-0.908848
TAF14	1.7154	18.3398	4.5726	0.00136864	0.0067435	-0.909734
ROK1	1.50675	16.6963	4.56916	0.00137533	0.00675946	-0.91473
SWI4	1.83042	14.5499	4.56554	0.00138243	0.00677734	-0.920004
VIR1	1.80932	14.865	4.5629	0.00138762	0.00678586	-0.923852
MRX1	1.4537	18.6003	4.5563	0.0014007	0.00682656	-0.933464
RPL36B	1.59038	21.4353	4.55459	0.0014041	0.00682656	-0.935953
SYP1	1.72382	17.5218	4.55345	0.00140639	0.00682656	-0.937622
LSB5	1.65187	14.8208	4.54674	0.00141987	0.00686825	-0.947404
BRR2	1.59489	17.099	4.54404	0.00142535	0.00686825	-0.951347
DBP5	2.22255	18.7565	4.54397	0.00142549	0.00686825	-0.951447
RPL31A	2.01759	20.5809	4.53935	0.0014349	0.00689666	-0.958193
TYW3	1.98539	15.1904	4.53724	0.00143921	0.00690046	-0.961268
SKG3	1.48478	14.9286	4.53422	0.00144541	0.0069133	-0.965676
RPS28A	1.54095	20.3926	4.53012	0.00145388	0.0069369	-0.971665
BUL2	1.65613	15.733	4.52683	0.00146073	0.00695264	-0.97648
RIX1	2.07997	18.1723	4.51246	0.00149099	0.00707721	-0.997499
RSR1	1.78835	15.6878	4.50698	0.0015027	0.00707721	-1.00552
RTT107	1.79742	15.4632	4.50586	0.00150511	0.00707721	-1.00716
HLJ1	3.83096	13.7953	4.50483	0.00150733	0.00707721	-1.00867
ERG1	1.43546	16.4279	4.5045	0.00150803	0.00707721	-1.00914
NVJ2	1.73824	14.2076	4.50266	0.00151201	0.00707721	-1.01185
RRG9	2.0724	16.7488	4.50259	0.00151216	0.00707721	-1.01195
POP1	1.57436	14.629	4.49596	0.00152656	0.0071276	-1.02167
PDR5	2.75249	16.7901	4.48802	0.00154399	0.00719186	-1.0333
YLR419W	2.779	18.2403	4.482	0.00155737	0.00723699	-1.04215
CET1	1.96512	15.5983	4.47538	0.00157221	0.00728865	-1.05186
THP3	1.88059	14.5713	4.47263	0.00157842	0.00729126	-1.05591
YGL082W	1.77199	15.4899	4.47184	0.00158021	0.00729126	-1.05706
RPL19A	1.57185	21.7844	4.46872	0.00158729	0.00730677	-1.06165
ASK10	2.06053	15.0623	4.46673	0.00159183	0.00731049	-1.06458
ALY2	1.6601	17.4348	4.46231	0.00160198	0.00733005	-1.07109
YVH1	1.88496	14.0299	4.46162	0.00160357	0.00733005	-1.0721
HRB1	1.85201	17.0821	4.45874	0.00161021	0.00734282	-1.07634
NCS2	1.94001	15.044	4.45676	0.00161478	0.00734282	-1.07925
RRP7	2.20667	16.5258	4.45483	0.00161927	0.00734282	-1.08209
KRI1	1.76406	19.4281	4.45283	0.00162393	0.00734282	-1.08504
BRE1	1.7301	16.4857	4.45031	0.00162981	0.00734282	-1.08874
RNH70	3.75583	14.6919	4.44689	0.00163786	0.00734282	-1.09379
PBP1	1.87952	19.9569	4.44663	0.00163847	0.00734282	-1.09417
PSK1	1.63773	14.2154	4.4458	0.00164041	0.00734282	-1.09538
RPS3	1.44564	21.7323	4.44462	0.00164321	0.00734282	-1.09713
TIP41	1.99375	15.4944	4.44437	0.0016438	0.00734282	-1.0975
PEP3	1.82461	17.3105	4.4406	0.00165274	0.00736595	-1.10306
RPS16A	1.721	20.9579	4.431	0.00167572	0.00744591	-1.11721
TFG1	1.67035	14.9855	4.42994	0.00167827	0.00744591	-1.11877
NHP2	1.35437	20.8555	4.425	0.00169027	0.00748221	-1.12607
SKI7	1.68369	15.0261	4.4131	0.0017195	0.00759243	-1.14364
SPT20	2.35411	16.1034	4.41173	0.00172291	0.00759243	-1.14567
KRR1	1.96565	18.2724	4.40874	0.00173037	0.00760233	-1.15009
UTP18	1.91669	17.785	4.40521	0.00173921	0.00760233	-1.15532
MED4	2.54493	15.9608	4.40424	0.00174163	0.00760233	-1.15674
CMP2	1.79767	18.2173	4.40262	0.00174573	0.00760233	-1.15915
ECM29	1.81176	17.0839	4.40165	0.00174817	0.00760233	-1.16058
RPL25	1.43304	22.0441	4.40155	0.00174842	0.00760233	-1.16073
EIS1	1.50404	17.1542	4.39556	0.00176361	0.00763718	-1.16959
RPA12	1.53865	18.9763	4.39532	0.00176422	0.00763718	-1.16995
ACF4	2.25098	15.2744	4.39357	0.00176869	0.00763966	-1.17254
PKP1	3.00568	14.9729	4.38556	0.00178929	0.00771165	-1.18441
HTA2	1.60767	21.4354	4.38145	0.00179996	0.00774063	-1.1905
KEX1	1.89826	16.154	4.37672	0.00181234	0.00776795	-1.19752
RTF1	1.47119	17.1723	4.37599	0.00181424	0.00776795	-1.19859
APL1	1.54324	16.9271	4.37197	0.00182484	0.00779631	-1.20456
OLE1	2.81117	14.5375	4.36272	0.00184947	0.00788437	-1.2183
VPS54	2.44917	14.1939	4.35858	0.00186061	0.00791466	-1.22445
RPL36A	1.43645	19.5165	4.35082	0.00188168	0.00798695	-1.23599
SEC8	1.68021	16.4906	4.3491	0.00188636	0.00798954	-1.23853
GIS2	1.65302	16.7898	4.34396	0.0019005	0.00803205	-1.24618
PET309	2.1773	15.0571	4.33479	0.00192601	0.00812237	-1.25984
HTB1	1.67846	22.5102	4.33268	0.0019319	0.00812975	-1.26297
FUN12	1.36895	19.0958	4.32553	0.0019521	0.00814917	-1.27363
FAS2	1.93702	18.4118	4.32553	0.00195211	0.00814917	-1.27363
TOR1	1.96102	16.2657	4.3253	0.00195276	0.00814917	-1.27397
HSV2	1.86546	14.3445	4.32511	0.00195331	0.00814917	-1.27426
RPC37	1.73485	16.9794	4.32346	0.001958	0.00814917	-1.27672
CYC8	1.55748	17.0414	4.32225	0.00196145	0.00814917	-1.27852
STE4	2.04307	15.2633	4.31724	0.0019758	0.00819143	-1.28599
RPO31	1.46094	17.7312	4.31255	0.00198934	0.00822919	-1.29299
SMC3	1.86129	18.258	4.31119	0.0019933	0.00822919	-1.29502
RPP0	1.5538	22.3936	4.30043	0.00202483	0.0083418	-1.3111
PUB1	1.68733	20.7509	4.2957	0.00203883	0.00837776	-1.31815
RPL17A	1.89081	21.1041	4.29336	0.00204582	0.00837776	-1.32166
AYR1	2.46636	15.082	4.28998	0.00205595	0.00837776	-1.32672
PFK1	1.45594	19.501	4.28975	0.00205664	0.00837776	-1.32706
UTP8	1.38189	18.64	4.28941	0.00205765	0.00837776	-1.32756
TGL1	1.64531	14.2591	4.28742	0.00206364	0.00837776	-1.33054
NBA1	2.07589	13.9785	4.28651	0.00206639	0.00837776	-1.33191
BRF1	1.79049	14.5308	4.28336	0.00207592	0.00837776	-1.33662
SRP1	1.66654	19.4964	4.28243	0.00207875	0.00837776	-1.33801
RPA190	1.68079	19.6855	4.28179	0.00208067	0.00837776	-1.33896
EFG1	1.52088	18.5255	4.2802	0.00208552	0.00837776	-1.34134
NOC2	1.44033	19.6924	4.27987	0.00208652	0.00837776	-1.34183
SKI6	2.05814	17.5578	4.27831	0.00209131	0.00837776	-1.34418
RRP4	1.60957	16.7371	4.27528	0.00210059	0.00837776	-1.34872
MIS1	1.57125	18.7217	4.27513	0.00210104	0.00837776	-1.34893
DIP2	1.44625	17.9757	4.27485	0.00210192	0.00837776	-1.34936
GCD10	2.67819	16.6374	4.27261	0.0021088	0.00838814	-1.35271
HHF1	1.67526	21.0107	4.26935	0.00211889	0.00840813	-1.3576
LYS9	3.18528	15.0848	4.26822	0.0021224	0.00840813	-1.35929
ABD1	1.75438	16.1872	4.26637	0.00212815	0.00841392	-1.36207
KAP114	2.02747	16.0053	4.26282	0.00213922	0.00843379	-1.36738
SLC1	1.76014	14.9085	4.26138	0.00214374	0.00843379	-1.36954
MET17	1.93804	17.8772	4.26064	0.00214608	0.00843379	-1.37066
RPL8A	1.40744	22.1609	4.25853	0.00215271	0.00844292	-1.37381
RGC1	1.81956	16.1723	4.25601	0.00216066	0.00845721	-1.37759
MGM101	1.80846	19.8911	4.2536	0.0021683	0.00846714	-1.38121
CAF40	1.9043	16.432	4.25249	0.00217184	0.00846714	-1.38287
TOM1	1.64986	15.0427	4.24862	0.0021842	0.00849845	-1.38869
MNN5	1.39958	15.7753	4.24474	0.00219666	0.00851426	-1.39451
VPS35	1.46949	17.017	4.24465	0.00219695	0.00851426	-1.39465
RRP8	1.40349	17.0868	4.24255	0.00220373	0.0085237	-1.3978
FKH2	1.81551	15.971	4.24005	0.00221184	0.00853824	-1.40157
LTV1	2.62005	15.7371	4.23316	0.00223433	0.00859709	-1.41192
SSN2	1.7899	13.9197	4.231	0.00224142	0.00859709	-1.41516
YFR016C	2.28989	13.5981	4.23061	0.00224269	0.00859709	-1.41575
YRA1	1.9168	19.0501	4.23002	0.00224463	0.00859709	-1.41663
CTF18	1.85683	14.8747	4.22289	0.00226829	0.00867078	-1.42736
SUB2	1.67264	20.4986	4.21812	0.00228425	0.0087076	-1.43454
HTZ1	1.55613	16.785	4.21619	0.00229074	0.0087076	-1.43745
MRPS16	2.36856	15.2076	4.21388	0.00229852	0.0087076	-1.44092
HFA1	3.43632	14.168	4.21304	0.00230137	0.0087076	-1.44219
RPS11A	1.51091	20.8207	4.2124	0.00230354	0.0087076	-1.44316
RPL16B	1.4147	20.6193	4.2121	0.00230456	0.0087076	-1.44361
SFB2	1.47097	16.061	4.21056	0.0023098	0.00871061	-1.44593
IMD3	3.47269	17.1181	4.20348	0.00233399	0.00877138	-1.4566
VPS33	1.52083	17.8	4.20323	0.00233486	0.00877138	-1.45698
RPS13	1.81337	21.3865	4.19266	0.00237149	0.00889194	-1.47291
VPS53	1.58581	14.6483	4.18838	0.00238651	0.0089312	-1.47938
TIF34	1.64294	19.7885	4.17833	0.00242217	0.00904737	-1.49456
YRB2	1.56643	16.7247	4.17386	0.00243818	0.00908987	-1.5013
UBP7	1.61305	14.0874	4.17138	0.00244716	0.00910604	-1.50507
BOI1	2.91923	15.6407	4.16987	0.00245261	0.00910904	-1.50734
GOS1	3.25204	15.4394	4.16839	0.00245798	0.00911173	-1.50958
SHM1	1.8078	17.1625	4.16634	0.00246544	0.00912214	-1.51268
SYF1	2.28658	14.9613	4.16464	0.00247165	0.0091279	-1.51526
SSA1	1.3912	21.1374	4.16179	0.00248208	0.00914916	-1.51957
RPS18A	1.4693	21.7236	4.15763	0.00249739	0.00918042	-1.52586
SEC16	1.76663	17.4549	4.15473	0.00250814	0.00918042	-1.53026
MIR1	3.30852	15.2519	4.15457	0.00250874	0.00918042	-1.5305
VAN1	2.02769	14.7203	4.15404	0.00251067	0.00918042	-1.53129
AHA1	1.38227	20.7052	4.15316	0.00251398	0.00918042	-1.53263
SHE2	2.42257	17.1538	4.15115	0.00252146	0.00918042	-1.53568
KRT33A	2.95805	13.3425	4.15065	0.00252333	0.00918042	-1.53643
RPC34	2.95344	15.0826	4.14859	0.00253101	0.0091913	-1.53954
TRA1	2.38757	17.6112	4.14524	0.00254362	0.00922005	-1.54463
VPS5	1.98234	17.1421	4.14323	0.00255121	0.00923049	-1.54768
RPL4A	1.57378	20.8488	4.13776	0.00257196	0.00927381	-1.55597
REP1	1.65674	17.8619	4.13758	0.00257264	0.00927381	-1.55624
BEM3	1.55748	14.3133	4.13353	0.00258815	0.00931258	-1.56239
BUD27	1.62769	16.0746	4.12828	0.00260834	0.00936159	-1.57034
CKB1	1.52003	17.4888	4.12752	0.00261132	0.00936159	-1.57151
WBP1	1.49099	15.6185	4.12526	0.00262008	0.00937588	-1.57494
ACP1	2.38367	16.3139	4.12313	0.00262835	0.00938832	-1.57816
NUP120	2.15968	14.8221	4.11924	0.00264358	0.00940908	-1.58407
BUD22	1.38037	18.2488	4.11894	0.00264476	0.00940908	-1.58453
GEA2	1.67072	16.4433	4.11797	0.00264855	0.00940908	-1.58599
MRPL6	2.35691	15.6671	4.11362	0.00266574	0.00943292	-1.59261
GCN3	1.56957	19.143	4.11286	0.00266875	0.00943292	-1.59377
PBS2	1.49492	16.726	4.11177	0.00267306	0.00943292	-1.59542
LRG1	1.79694	14.5877	4.11141	0.00267451	0.00943292	-1.59597
DBF2	1.68365	16.9193	4.10775	0.0026891	0.00946738	-1.60154
PAF1	2.21683	17.1459	4.10261	0.0027097	0.00948322	-1.60935
SLM1	1.57336	17.4113	4.10239	0.00271061	0.00948322	-1.60969
SUA7	1.6151	16.8888	4.10154	0.00271403	0.00948322	-1.61098
NOP13	1.50078	18.4677	4.10087	0.00271674	0.00948322	-1.612
FIP1	1.71161	17.1908	4.09967	0.0027216	0.00948322	-1.61383
PWP2	1.58927	17.6458	4.09942	0.00272262	0.00948322	-1.61421
RPS15	1.56609	21.0599	4.09648	0.00273455	0.00950788	-1.61868
RPC25	1.74883	17.2301	4.09474	0.00274161	0.00951557	-1.62132
UTP11	1.23805	17.2913	4.09184	0.00275348	0.00953989	-1.62574
LYS4	2.24612	16.5047	4.08974	0.00276211	0.00954111	-1.62894
LSG1	1.26691	15.1896	4.08938	0.00276357	0.00954111	-1.62948
MRH4	1.28525	21.453	4.08771	0.00277046	0.00954811	-1.63203
CBP3	1.45617	15.9164	4.0836	0.00278748	0.00958516	-1.63829
UTP10	1.62271	18.9285	4.08275	0.00279099	0.00958516	-1.63958
RPB3	2.29756	17.145	4.07485	0.00282404	0.00968173	-1.65162
NUT1	1.67903	17.057	4.07034	0.0028431	0.00971748	-1.6585
SUV3	2.11756	14.3261	4.07004	0.00284438	0.00971748	-1.65896
EBP2	1.49974	18.9727	4.06424	0.00286908	0.00977293	-1.66781
KTR3	2.31314	16.6848	4.06312	0.00287388	0.00977293	-1.66951
CCL1	1.81893	15.3453	4.06259	0.00287616	0.00977293	-1.67032
MRP20	1.74584	17.7105	4.06157	0.00288055	0.00977293	-1.67188
RPS14B	1.3796	21.9326	4.05572	0.00290582	0.00983742	-1.68082
GLC7	1.97441	16.3964	4.05372	0.00291453	0.00983742	-1.68388
CTR86	1.6402	16.4248	4.05349	0.00291551	0.00983742	-1.68422
RPS2	1.31677	21.4281	4.0521	0.00292157	0.00983742	-1.68634
SEC26	1.51311	19.2382	4.0514	0.00292464	0.00983742	-1.68742
TAF12	2.67451	17.8932	4.04979	0.00293169	0.00983941	-1.68988
TAF6	2.05085	18.0936	4.04804	0.00293938	0.00983941	-1.69256
SGF29	1.80946	14.4787	4.04783	0.00294028	0.00983941	-1.69287
SIN4	1.95209	17.0892	4.04386	0.00295779	0.009858	-1.69894
DHH1	1.90406	18.9213	4.04315	0.00296092	0.009858	-1.70002
PRP39	1.85672	15.3774	4.0419	0.00296645	0.00985968	-1.70193
RGA1	1.47392	15.6062	4.03465	0.0029988	0.0099484	-1.71302
DPS1	2.21274	19.5053	4.03349	0.00300404	0.0099484	-1.71481
GAL11	1.73742	16.7898	4.03007	0.00301944	0.0099484	-1.72003
CLA4	1.98762	15.3624	4.02752	0.00303099	0.0099484	-1.72394
VPS4	1.43732	16.7312	4.0275	0.00303109	0.0099484	-1.72397
RPS7B	1.5421	21.126	4.02743	0.00303141	0.0099484	-1.72408
SSA2	1.27513	22.7514	4.02688	0.00303389	0.0099484	-1.72491
RPC82	1.48839	18.6179	4.02586	0.00303854	0.0099484	-1.72648
VBA4	1.61116	15.1589	4.02484	0.00304317	0.0099484	-1.72804
MLH1	1.57564	16.0295	4.02469	0.00304388	0.0099484	-1.72828
MUK1	2.16907	16.6232	4.01529	0.00308702	0.0100726	-1.74266
RPL33B	1.4411	18.4398	4.01148	0.00310474	0.0101136	-1.74851
CRM1	1.46472	18.8824	4.01006	0.00311136	0.0101184	-1.75069
OSH3	2.448	15.3834	4.00753	0.0031232	0.0101401	-1.75457
WHI3	2.425	17.1846	4.00201	0.00314913	0.0101886	-1.76303
PFK26	2.38727	14.5515	4.0011	0.00315346	0.0101886	-1.76443
PFK2	1.29483	20.0535	4.00032	0.00315717	0.0101886	-1.76563
YDR514C	2.94404	14.3722	3.99994	0.00315894	0.0101886	-1.7662
RPS24A	1.66143	20.355	3.99518	0.0031816	0.010218	-1.77351
MTR10	1.61929	15.4439	3.99467	0.00318407	0.010218	-1.7743
ETR1	1.42929	16.4307	3.99318	0.00319119	0.010218	-1.77659
HEL2	2.42739	15.4698	3.99301	0.00319199	0.010218	-1.77684
UPF3	1.70895	16.8013	3.99257	0.00319411	0.010218	-1.77752
MAM3	1.6202	13.7187	3.97621	0.00327366	0.0104555	-1.80266
IMD2	3.14598	14.2854	3.96988	0.00330497	0.0105383	-1.81239
SNF12	2.32538	16.9229	3.96463	0.00333121	0.0106047	-1.82047
RPL15A	1.62146	20.3046	3.9595	0.00335704	0.0106696	-1.82836
PEX3	2.48231	14.9441	3.95778	0.00336578	0.0106801	-1.83102
MNN10	3.63932	15.268	3.95379	0.00338607	0.0107271	-1.83716
YCR043C	3.78291	14.6218	3.94447	0.00343398	0.0108566	-1.85151
MYO2	1.59728	18.7542	3.94342	0.00343947	0.0108566	-1.85314
IRA1	2.7545	15.7406	3.94174	0.00344816	0.0108566	-1.85572
MDN1	1.30872	19.3131	3.94118	0.0034511	0.0108566	-1.85659
RGD2	1.78451	16.1923	3.9405	0.00345464	0.0108566	-1.85764
UFD2	1.76119	17.2413	3.93846	0.00346531	0.0108728	-1.86079
PUS4	2.13617	14.4675	3.93683	0.00347385	0.0108821	-1.8633
NOP56	2.33016	20.9679	3.93348	0.00349148	0.0109065	-1.86847
FOB1	1.76666	14.6391	3.93323	0.00349276	0.0109065	-1.86884
RSA3	2.92101	16.394	3.92799	0.00352051	0.0109757	-1.87693
RPL12A	1.33673	22.1436	3.92478	0.00353763	0.0110116	-1.88188
RRP12	1.33505	18.9584	3.92126	0.00355651	0.011037	-1.88732
GCD11	1.32807	19.2401	3.92116	0.00355705	0.011037	-1.88748
MSH2	1.48013	19.7935	3.91945	0.00356627	0.0110481	-1.89012
SIN3	2.35008	17.41	3.91442	0.00359349	0.0111149	-1.89788
RRP9	1.27027	17.3345	3.91295	0.00360153	0.0111222	-1.90016
STE24	1.5869	15.7341	3.91072	0.0036137	0.0111313	-1.90361
YBL036C	1.9519	16.0904	3.90927	0.00362162	0.0111313	-1.90585
TY1B-DR3	1.84523	14.6492	3.90759	0.00363083	0.0111313	-1.90844
GSY1	2.22141	15.1201	3.90737	0.00363208	0.0111313	-1.90879
UTP23	1.34479	17.7635	3.90722	0.00363287	0.0111313	-1.90901
RPL35A	1.28436	21.7861	3.90531	0.00364339	0.0111462	-1.91196
NIC96	1.34094	17.4874	3.90423	0.00364935	0.011147	-1.91363
RPS8A	1.64033	20.6307	3.90106	0.00366694	0.0111833	-1.91854
MRP4	1.48288	15.1989	3.89812	0.00368331	0.0112158	-1.92309
RPL10	1.62791	18.5609	3.89614	0.00369436	0.011232	-1.92615
RPL22A	1.98151	18.756	3.88288	0.00376942	0.0114425	-1.94669
UTR1	1.78523	16.8508	3.88039	0.00378365	0.0114679	-1.95053
SRP68	1.25037	17.9223	3.87181	0.0038333	0.0115861	-1.96384
IMD4	1.69798	19.3941	3.87161	0.00383445	0.0115861	-1.96415
CUZ1	3.46529	16.1478	3.86302	0.00388481	0.0117202	-1.97746
RPL23A	1.39039	22.3513	3.86161	0.00389316	0.0117273	-1.97965
SAS4	2.19661	14.0715	3.85779	0.00391585	0.0117776	-1.98559
KAP104	1.39253	18.1545	3.85552	0.00392937	0.011781	-1.9891
RET2	1.38818	19.1988	3.8538	0.00393969	0.011781	-1.99178
RRP3	1.56009	19.0211	3.85349	0.0039415	0.011781	-1.99225
RPS9B	1.3622	20.6855	3.85257	0.00394702	0.011781	-1.99368
HSP104	1.30207	19.3989	3.84683	0.00398165	0.0118537	-2.00259
STE50	1.37835	16.003	3.84629	0.00398497	0.0118537	-2.00344
BMH1	1.42993	20.4488	3.84494	0.00399317	0.0118537	-2.00554
AIR1	1.95606	14.2668	3.84454	0.00399558	0.0118537	-2.00615
SAP190	1.45027	15.3535	3.84242	0.00400852	0.0118624	-2.00945
SMD2	3.64655	15.495	3.84208	0.00401059	0.0118624	-2.00998
RNA14	1.83809	16.529	3.83831	0.00403367	0.0119127	-2.01584
CHS2	1.73202	13.5166	3.83099	0.00407891	0.0120282	-2.02721
MRT4	1.29629	18.5704	3.8263	0.00410815	0.0120962	-2.0345
PAP1	1.59251	17.5689	3.82261	0.00413138	0.0121305	-2.04025
MPP10	1.81688	17.5736	3.82248	0.00413218	0.0121305	-2.04045
YLL032C	2.29346	16.7196	3.81989	0.0041485	0.0121603	-2.04447
NAT1	1.40527	17.7853	3.81774	0.00416217	0.0121821	-2.04783
RPP1	1.57775	15.8584	3.81622	0.00417186	0.0121904	-2.0502
RPS22B	1.28268	19.968	3.81534	0.00417745	0.0121904	-2.05157
RRP5	1.3038	19.9232	3.81187	0.00419959	0.0122335	-2.05696
KAP122	1.44993	16.0654	3.81048	0.00420853	0.0122335	-2.05913
HSE1	1.28593	16.5109	3.81011	0.00421092	0.0122335	-2.05971
NOP6	1.41887	18.2846	3.80415	0.00424944	0.0123217	-2.06899
CKB2	1.28928	17.5071	3.80347	0.00425384	0.0123217	-2.07005
MFT1	3.12429	16.7285	3.79926	0.00428131	0.0123647	-2.07661
TAF4	1.85692	15.935	3.79781	0.00429083	0.0123683	-2.07888
GCR2	1.68254	15.9045	3.79516	0.0043082	0.0123683	-2.083
MSH6	1.42236	17.8311	3.79506	0.00430889	0.0123683	-2.08316
ARC1	1.86075	18.2362	3.79444	0.004313	0.0123683	-2.08413
RPC40	1.44686	20.3069	3.79427	0.00431409	0.0123683	-2.08439
USO1	1.37659	18.2297	3.79288	0.00432324	0.0123765	-2.08655
DSL1	1.48492	15.3571	3.79134	0.00433348	0.0123877	-2.08896
HTS1	2.45096	17.6127	3.78691	0.00436296	0.0124538	-2.09588
MRP1	1.48087	15.5801	3.78447	0.00437924	0.0124566	-2.09967
CIT1	2.18341	16.4814	3.78397	0.00438261	0.0124566	-2.10046
PEX6	1.46009	14.2365	3.78338	0.00438657	0.0124566	-2.10138
RFC4	2.1072	17.5279	3.78221	0.0043944	0.0124566	-2.1032
RPL28	1.51001	20.577	3.78124	0.00440099	0.0124566	-2.10472
TFC4	1.73957	15.2317	3.78061	0.00440521	0.0124566	-2.1057
VMA5	1.41284	19.5595	3.78013	0.00440842	0.0124566	-2.10644
LAA1	1.6211	16.7232	3.77416	0.0044489	0.0125529	-2.11576
LST8	1.88163	17.3332	3.77308	0.00445631	0.0125531	-2.11746
PUF6	1.28208	18.6922	3.77144	0.00446747	0.0125531	-2.12001
SPN1	1.37673	17.167	3.77134	0.00446815	0.0125531	-2.12017
RPA49	1.50301	19.4085	3.76928	0.00448229	0.0125748	-2.12339
GIR2	1.54979	18.7228	3.76676	0.00449966	0.0126002	-2.12733
PLP2	1.41595	17.2033	3.7653	0.00450974	0.0126002	-2.12961
RRP6	1.28177	19.3133	3.76517	0.00451064	0.0126002	-2.12981
DOA1	1.40516	15.4032	3.76276	0.00452736	0.0126194	-2.13359
SSF1	1.22275	16.8445	3.76232	0.00453036	0.0126194	-2.13426
RPL14B	1.28181	15.7002	3.75609	0.00457387	0.0126946	-2.144
YDJ1	1.37823	21.2058	3.75567	0.0045768	0.0126946	-2.14465
PDS5	1.51056	16.8331	3.75294	0.00459607	0.0127143	-2.14894
NUP170	1.52062	15.4635	3.75282	0.00459687	0.0127143	-2.14911
SDS24	1.49463	18.4756	3.75045	0.00461364	0.0127427	-2.15283
SUI3	1.25384	19.8308	3.74905	0.00462358	0.0127522	-2.15502
RPS27B	1.8436	20.2521	3.74371	0.00466161	0.0128391	-2.16337
HAT2	1.68479	18.7502	3.73618	0.00471586	0.0129703	-2.17516
YGR130C	1.29215	16.4027	3.7346	0.00472736	0.0129757	-2.17764
NSA2	1.23347	15.7971	3.73408	0.00473108	0.0129757	-2.17844
RTG2	1.78016	16.2168	3.72658	0.004786	0.0130844	-2.1902
RPL43A	1.17918	17.746	3.726	0.00479021	0.0130844	-2.19109
CDC12	1.57994	17.799	3.72594	0.00479072	0.0130844	-2.1912
SRB5	2.89188	15.255	3.72312	0.00481154	0.013123	-2.19562
RTT106	1.48327	15.8514	3.71837	0.00484678	0.0132007	-2.20305
RRS1	1.41842	17.8328	3.71626	0.00486258	0.0132108	-2.20637
PET9	1.61829	18.4552	3.71561	0.0048674	0.0132108	-2.20738
SUP35	1.85679	19.6642	3.71518	0.0048707	0.0132108	-2.20807
RBG2	1.50555	18.7359	3.71338	0.00488419	0.0132204	-2.21089
JSN1	1.72498	16.6424	3.71231	0.0048922	0.0132204	-2.21255
RPS26B	1.56116	20.4612	3.71202	0.00489445	0.0132204	-2.21302
SXM1	1.42694	18.4278	3.70979	0.00491127	0.0132316	-2.21652
DCC1	1.85836	15.5023	3.70968	0.0049121	0.0132316	-2.21669
RRP45	2.17113	16.7814	3.70643	0.00493673	0.0132728	-2.22178
PIM1	1.29354	20.8387	3.70588	0.00494092	0.0132728	-2.22265
UBA4	1.67884	19.6084	3.70391	0.00495591	0.0132948	-2.22573
FCF2	1.69787	16.2734	3.69882	0.00499497	0.0133813	-2.23373
CDC31	1.36547	15.777	3.69409	0.00503157	0.013461	-2.24116
RPS23A	2.01486	19.458	3.68823	0.0050772	0.0135614	-2.25035
DOM34	1.45787	17.8245	3.68677	0.00508865	0.0135614	-2.25265
LSM2	2.00877	18.3636	3.68611	0.00509383	0.0135614	-2.25368
SRP72	1.21987	17.3227	3.68574	0.00509674	0.0135614	-2.25427
YCR016W	1.23112	17.4449	3.68353	0.00511415	0.0135892	-2.25774
GRE2	2.96351	16.4441	3.6824	0.00512306	0.0135927	-2.25951
RPS25A	1.97518	20.9566	3.68161	0.00512934	0.0135927	-2.26076
ACS2	1.30465	18.4617	3.67927	0.00514789	0.0136235	-2.26443
THS1	1.55386	17.589	3.67602	0.00517384	0.0136737	-2.26955
RPB5	1.5182	18.4006	3.67362	0.005193	0.0137059	-2.27331
PRP6	2.21545	14.5277	3.66878	0.00523201	0.0137903	-2.28093
NOG1	1.2503	18.309	3.66482	0.00526414	0.0138563	-2.28716
MRPL40	1.80253	18.6995	3.66126	0.00529315	0.013901	-2.29276
THO2	1.24586	18.0206	3.661	0.00529528	0.013901	-2.29316
SKT5	1.30679	17.3429	3.65999	0.00530357	0.0139041	-2.29476
SGV1	2.20852	14.7553	3.65832	0.00531729	0.0139215	-2.29739
ARP3	1.34236	20.1329	3.654	0.00535295	0.0139962	-2.30419
SAS10	1.49237	17.5848	3.65174	0.00537171	0.014011	-2.30775
RPL13B	1.33813	21.2077	3.6516	0.00537289	0.014011	-2.30797
HYM1	1.66972	16.8819	3.65047	0.00538228	0.0140125	-2.30975
SWD2	2.76999	14.8565	3.64981	0.00538777	0.0140125	-2.31079
SNF4	1.3712	17.5438	3.64855	0.00539828	0.0140151	-2.31277
SWC4	2.02641	16.0086	3.64798	0.00540305	0.0140151	-2.31367
SDS23	1.60708	17.7583	3.64678	0.00541314	0.0140227	-2.31557
NUM1	1.71427	16.9882	3.64462	0.00543127	0.0140511	-2.31897
YAF9	1.93927	15.4965	3.6404	0.00546685	0.0141245	-2.32561
MED1	1.44389	16.7471	3.63904	0.00547841	0.0141334	-2.32776
SYC1	1.3494	15.5085	3.6383	0.0054847	0.0141334	-2.32893
POP5	1.65784	15.6151	3.63542	0.00550916	0.0141778	-2.33346
SET3	1.55	16.6322	3.63238	0.00553518	0.0142261	-2.33825
RPL2A	2.03091	19.3202	3.62932	0.00556149	0.014275	-2.34307
PIL1	1.36982	19.6918	3.62433	0.00560473	0.0143672	-2.35095
RIM20	1.27083	17.0366	3.62317	0.00561478	0.0143741	-2.35277
RTR1	2.89418	14.0701	3.62127	0.00563138	0.0143978	-2.35578
SEC21	1.37804	18.5121	3.61935	0.00564817	0.0144112	-2.3588
RPS1A	1.3917	21.007	3.61899	0.00565131	0.0144112	-2.35937
ZDS1	1.66945	14.667	3.61586	0.00567882	0.0144625	-2.36431
NOP14	2.29501	16.7794	3.61326	0.00570183	0.0145023	-2.36842
RPL6A	1.1252	21.3663	3.6052	0.00577363	0.0146659	-2.38114
DSS1	1.67567	16.9501	3.60169	0.00580518	0.014727	-2.38668
UTP20	2.11012	17.7233	3.59703	0.00584741	0.0148149	-2.39405
NEW1	1.31448	19.3375	3.59586	0.00585806	0.0148153	-2.3959
TAF10	2.52103	15.0313	3.59535	0.00586264	0.0148153	-2.3967
RSM22	2.05447	14.3449	3.59321	0.00588217	0.0148455	-2.40008
YKL071W	1.49801	17.1048	3.58852	0.00592531	0.0149351	-2.40751
RPS31	1.4972	21.5878	3.57909	0.00601285	0.0150789	-2.42241
UBX5	1.5398	13.6386	3.579	0.00601366	0.0150789	-2.42255
RSP5	1.22522	17.543	3.57874	0.00601608	0.0150789	-2.42296
NUP188	1.47178	16.9974	3.57824	0.00602079	0.0150789	-2.42375
CEX1	1.45278	18.2729	3.57482	0.00605299	0.0151402	-2.42918
ARO9	1.5829	16.8451	3.57032	0.00609554	0.0152162	-2.4363
SEC1	2.14216	13.6159	3.56997	0.00609889	0.0152162	-2.43685
APL4	1.92158	17.0539	3.5651	0.00614527	0.0153124	-2.44455
FKH1	2.224	15.5794	3.56209	0.00617422	0.015365	-2.44933
RPF2	1.47609	17.2707	3.55492	0.00624358	0.015518	-2.46068
SET2	1.72175	15.1137	3.55361	0.00625636	0.0155288	-2.46275
UTP30	1.3611	18.3472	3.55285	0.00626378	0.0155288	-2.46396
RPS4A	1.39044	21.4903	3.55179	0.00627414	0.0155348	-2.46564
IMG1	1.47643	16.7048	3.5479	0.00631234	0.0156097	-2.4718
VAS1	2.16622	16.1287	3.54622	0.00632885	0.0156308	-2.47445
DIM1	1.31554	17.6148	3.54406	0.00635027	0.015664	-2.47789
UTP6	1.28355	17.5709	3.54264	0.00636436	0.015678	-2.48014
NDE1	1.78754	15.614	3.54188	0.00637192	0.015678	-2.48134
NUP85	1.6024	15.2998	3.53837	0.00640688	0.0157442	-2.4869
RPL20A	1.25202	21.3905	3.53704	0.00642022	0.0157573	-2.48901
FSH3	1.50879	16.9928	3.53616	0.0064291	0.0157593	-2.49042
VPH1	1.67818	16.2463	3.53338	0.00645704	0.0157983	-2.49482
GLO3	1.5108	17.6927	3.53271	0.00646376	0.0157983	-2.49588
IPI3	1.69427	16.6183	3.53063	0.00648483	0.0157983	-2.49918
TMA19	1.5537	19.1886	3.53015	0.00648975	0.0157983	-2.49995
PDR16	1.64585	18.4615	3.53014	0.00648978	0.0157983	-2.49995
RPL18A	1.18801	21.024	3.52979	0.00649333	0.0157983	-2.50051
SGD1	1.70467	16.36	3.52623	0.00652956	0.0158667	-2.50616
REF2	1.67426	15.8594	3.52411	0.00655129	0.0158999	-2.50953
RPL5	1.42006	20.2115	3.52178	0.00657518	0.0159381	-2.51323
STM1	1.96907	19.5224	3.51677	0.00662687	0.0160436	-2.52118
NOC3	1.27404	16.633	3.51307	0.00666538	0.0161049	-2.52706
RPL21A	1.20544	21.2125	3.51275	0.00666863	0.0161049	-2.52756
UBC1	1.31258	18.9909	3.51017	0.00669567	0.0161462	-2.53166
SEC18	1.29658	20.5109	3.50955	0.00670219	0.0161462	-2.53265
SMC2	1.86108	16.1409	3.50822	0.00671612	0.0161599	-2.53476
SGT1	1.35605	15.7886	3.50672	0.00673188	0.016178	-2.53714
SLH1	2.18103	18.3448	3.50107	0.00679171	0.0162952	-2.54612
ZWF1	1.93444	16.0144	3.50055	0.00679727	0.0162952	-2.54695
RPL9A	1.15554	20.937	3.49904	0.00681329	0.016307	-2.54934
RFC2	1.26378	18.435	3.49744	0.00683038	0.016307	-2.55188
APC4	1.79476	13.963	3.49651	0.00684034	0.016307	-2.55336
YOR131C	1.38174	18.059	3.49608	0.00684503	0.016307	-2.55405
NSR1	1.09077	20.4818	3.49544	0.00685182	0.016307	-2.55506
CDC23	1.66705	15.7485	3.49542	0.00685208	0.016307	-2.5551
RRP43	1.5612	16.4917	3.4935	0.00687272	0.0163247	-2.55815
RPS12	1.25675	21.9986	3.49318	0.00687617	0.0163247	-2.55866
CKI1	1.51944	16.6844	3.48922	0.00691894	0.0163846	-2.56495
LAS17	1.4368	15.8843	3.48846	0.00692722	0.0163846	-2.56616
ATP11	1.58116	16.9857	3.48716	0.00694134	0.0163846	-2.56823
UTP7	1.33455	16.9998	3.48712	0.00694176	0.0163846	-2.56829
RPN7	1.09981	18.6821	3.48699	0.00694319	0.0163846	-2.5685
RGD1	1.45622	16.8142	3.48435	0.00697203	0.0164329	-2.5727
IKI1	2.06839	17.0385	3.47431	0.00708261	0.0166718	-2.58867
PSY4	1.49256	15.5809	3.47201	0.00710827	0.0166718	-2.59233
YLR287C	1.7745	16.4287	3.47138	0.0071153	0.0166718	-2.59334
NMA1	2.09488	17.0268	3.47106	0.00711886	0.0166718	-2.59384
EBS1	1.99661	16.3605	3.47008	0.00712984	0.0166718	-2.59541
CDC28	1.48821	19.1876	3.46992	0.00713163	0.0166718	-2.59566
BUD21	1.23212	17.8776	3.4698	0.00713292	0.0166718	-2.59585
RPL7A	1.40005	22.4216	3.46895	0.00714245	0.0166742	-2.5972
SLY1	1.36442	17.2568	3.46781	0.00715522	0.0166842	-2.59901
CCA1	3.2606	14.6767	3.46601	0.0071755	0.0167116	-2.60188
BMH2	1.39993	19.0305	3.46367	0.00720194	0.0167334	-2.60561
NOT3	2.52982	16.9746	3.4614	0.00722765	0.0167733	-2.60922
SEC7	1.4466	17.4605	3.45994	0.00724424	0.0167919	-2.61155
KEL1	1.5423	16.4966	3.45857	0.00725984	0.0168082	-2.61373
RPC53	1.87607	15.7837	3.45634	0.00728531	0.0168473	-2.61728
YGR266W	1.13511	15.6102	3.45486	0.0073023	0.0168667	-2.61964
AAP1	1.19798	13.3993	3.44877	0.0073725	0.0170087	-2.62934
MAD1	1.44644	15.9764	3.44802	0.00738113	0.0170087	-2.63053
TFB3	3.00332	14.2303	3.44659	0.0073978	0.0170271	-2.63282
RPN13	1.07081	18.2751	3.44337	0.00743529	0.0170917	-2.63794
PNO1	1.06592	16.8866	3.44269	0.0074433	0.0170917	-2.63903
NUF2	1.82801	14.9335	3.44136	0.00745889	0.0171075	-2.64115
MCM6	1.71796	17.6383	3.43951	0.00748065	0.0171373	-2.64411
CMS1	1.26268	18.0603	3.43624	0.00751917	0.0172055	-2.64931
CDC10	1.27355	18.2802	3.43206	0.00756877	0.0172988	-2.65597
ARP9	2.11869	16.9452	3.43119	0.00757914	0.0173023	-2.65736
RPL27A	1.58157	21.1812	3.43039	0.00758874	0.0173041	-2.65864
RPT6	1.07507	20.2704	3.42926	0.00760221	0.0173147	-2.66044
ILV2	1.17229	20.8258	3.42713	0.00762783	0.0173528	-2.66385
HIS5	1.8987	14.7451	3.42565	0.00764557	0.0173528	-2.6662
RVS167	1.68769	18.5081	3.42559	0.00764631	0.0173528	-2.6663
SOF1	1.09794	16.847	3.42492	0.00765432	0.0173528	-2.66736
POP2	2.04384	16.627	3.42302	0.00767733	0.0173848	-2.6704
ATG20	1.3958	15.9537	3.41877	0.00772893	0.0174815	-2.67719
SSH1	1.31528	15.1215	3.41111	0.00782276	0.017653	-2.68941
RGP1	2.53721	12.9208	3.4098	0.00783893	0.0176691	-2.69151
CDC25	1.36311	16.9242	3.40726	0.00787028	0.0177194	-2.69555
GEP3	1.44753	15.1412	3.40497	0.00789887	0.0177634	-2.69922
NUG1	1.13658	18.6287	3.39528	0.00802047	0.0180162	-2.71469
RFC1	2.32712	17.059	3.39366	0.00804098	0.0180416	-2.71728
SEC6	2.28234	16.6534	3.39282	0.00805163	0.0180448	-2.71862
RMR1	1.93306	14.214	3.38701	0.00812585	0.0181904	-2.72791
ACL4	1.66408	17.357	3.38305	0.00817677	0.0182835	-2.73423
CHO2	1.33222	15.2776	3.38176	0.00819346	0.0183	-2.73629
NOP58	1.01373	20.8321	3.37543	0.00827586	0.018463	-2.74642
SMY2	1.5099	17.3031	3.37134	0.00832946	0.0185511	-2.75296
CAR2	2.07547	14.5392	3.37098	0.00833428	0.0185511	-2.75354
NOB1	2.50275	14.9979	3.36769	0.0083777	0.0186266	-2.7588
ATP5	1.548	15.551	3.36344	0.00843415	0.0187122	-2.7656
CSN12	1.39447	16.8707	3.36336	0.00843528	0.0187122	-2.76573
YIR035C	1.82788	16.0104	3.36076	0.00847005	0.0187681	-2.76989
PKP2	2.42773	14.7654	3.3595	0.00848693	0.0187843	-2.77191
PTC4	1.26004	15.7584	3.34927	0.00862537	0.0190692	-2.78828
HSP26	2.34687	17.9788	3.33947	0.00876027	0.0193456	-2.80397
APT1	2.06416	17.7675	3.33775	0.00878417	0.0193766	-2.80673
MDR1	1.29731	16.4393	3.33473	0.0088264	0.0194265	-2.81157
HHT1	1.30904	18.1995	3.33413	0.00883475	0.0194265	-2.81253
SNF2	2.66606	17.6428	3.33383	0.00883889	0.0194265	-2.813
BMS1	2.56258	18.793	3.3333	0.00884644	0.0194265	-2.81387
HGH1	1.84284	17.4599	3.32878	0.00890998	0.0195442	-2.8211
HSM3	1.26535	15.4621	3.32451	0.00897044	0.0196195	-2.82794
SEC10	1.40492	16.0936	3.32439	0.00897221	0.0196195	-2.82814
RQC1	1.74012	14.818	3.32424	0.00897433	0.0196195	-2.82838
CAM1	1.22984	19.1005	3.32279	0.00899495	0.0196426	-2.8307
CAP2	1.39424	17.4768	3.31184	0.00915257	0.0199646	-2.84825
NIP7	1.2365	18.6964	3.30707	0.0092222	0.0200941	-2.85591
URB2	1.99853	16.6979	3.30277	0.00928541	0.0202088	-2.86281
BNI1	2.05327	17.2315	3.30209	0.00929543	0.0202088	-2.8639
VMA13	1.21772	19.5246	3.30029	0.00932191	0.0202439	-2.86678
GYL1	1.35496	15.3664	3.29722	0.00936759	0.0202853	-2.87172
NAN1	1.28224	18.3658	3.29714	0.0093688	0.0202853	-2.87185
FKS1	1.53545	18.8165	3.29692	0.009372	0.0202853	-2.87219
YPR022C	1.32794	15.6778	3.29587	0.00938764	0.0202968	-2.87388
BRO1	1.29882	16.5983	3.28637	0.00953045	0.0205467	-2.88913
RPT3	1.24198	18.7124	3.28628	0.00953188	0.0205467	-2.88928
ALD6	1.1281	17.9804	3.28609	0.0095347	0.0205467	-2.88957
LIP5	1.69185	15.6305	3.28362	0.00957215	0.0206048	-2.89353
DBP3	1.13915	21.199	3.27914	0.0096406	0.0207242	-2.90073
UTP9	1.18405	18.3919	3.27833	0.0096531	0.0207242	-2.90204
HDA3	1.35111	16.8156	3.27757	0.0096648	0.0207242	-2.90326
ACO2	1.48097	15.8549	3.27723	0.0096699	0.0207242	-2.90379
CMD1	1.19832	18.6577	3.27435	0.00971441	0.0207969	-2.90843
GRX7	1.32939	15.2431	3.2696	0.0097881	0.0209196	-2.91606
ENP1	1.30315	17.8364	3.26836	0.00980742	0.0209196	-2.91805
MRX5	1.78215	14.983	3.26728	0.00982424	0.0209196	-2.91978
NOG2	1.70694	17.0968	3.26725	0.00982476	0.0209196	-2.91983
SCJ1	1.40023	17.1862	3.26723	0.00982508	0.0209196	-2.91986
RPP2B	1.43386	21.0848	3.26561	0.00985041	0.0209508	-2.92246
RPS20	1.06567	20.727	3.26401	0.0098755	0.0209814	-2.92503
GDE1	1.44759	18.5308	3.26218	0.00990436	0.0210171	-2.92798
SNX3	1.21975	16.6914	3.26158	0.00991374	0.0210171	-2.92893
PFS2	1.40104	16.3011	3.25779	0.00997379	0.0211054	-2.93503
GIN4	1.78427	18.9436	3.2576	0.00997689	0.0211054	-2.93534
PRE3	1.53942	19.2286	3.25371	0.0100388	0.0212135	-2.94158
HOG1	1.29459	18.4767	3.25136	0.0100765	0.0212702	-2.94536
BEM4	1.611	15.9461	3.24285	0.0102141	0.0215375	-2.95905
LCP5	1.13724	16.9481	3.24205	0.0102272	0.0215418	-2.96033
RPC17	1.56117	16.3245	3.23879	0.0102804	0.0216284	-2.96557
PCF11	2.59934	16.1332	3.23818	0.0102903	0.0216284	-2.96655
GID7	2.08565	15.8141	3.23431	0.0103542	0.0217393	-2.97278
SMY1	1.20152	16.8385	3.23238	0.0103859	0.0217827	-2.97587
TRI1	1.2745	15.4538	3.2308	0.0104123	0.0218146	-2.97842
CBR1	1.3704	17.2279	3.22757	0.0104661	0.0219039	-2.98362
SST2	2.79533	17.4381	3.22195	0.0105602	0.0220732	-2.99265
MCM2	1.82214	15.4697	3.22141	0.0105695	0.0220732	-2.99353
ARP4	1.94251	16.042	3.21956	0.0106006	0.0221146	-2.9965
CFT1	2.11372	16.2768	3.21805	0.0106263	0.0221447	-2.99894
CDC24	1.67362	16.022	3.21678	0.0106477	0.0221514	-3.00097
ETT1	1.58527	18.4356	3.21605	0.0106603	0.0221514	-3.00216
CKA1	1.31724	18.1719	3.21586	0.0106634	0.0221514	-3.00245
PTC3	1.49179	16.1566	3.21446	0.0106874	0.0221778	-3.00472
TDH2	1.29044	23.8359	3.2081	0.0107964	0.0223786	-3.01495
TEX1	1.0892	20.9051	3.20749	0.010807	0.0223786	-3.01593
MCM5	1.55282	17.571	3.20384	0.0108702	0.0224858	-3.02181
HFD1	4.62708	14.7604	3.19864	0.0109608	0.0226492	-3.03017
PRE4	1.64368	14.847	3.19316	0.0110573	0.0228247	-3.03901
RPL9B	1.80185	14.9139	3.19184	0.0110806	0.0228486	-3.04112
SSE1	1.04718	19.5133	3.17696	0.0113475	0.0233745	-3.06509
CDC14	1.67806	17.4092	3.17594	0.0113661	0.0233881	-3.06674
DOP1	1.68213	20.5697	3.17048	0.0114658	0.0235686	-3.07554
ORC3	1.75986	14.3331	3.16869	0.0114987	0.0235951	-3.07842
RIO2	1.51075	16.6369	3.16847	0.0115027	0.0235951	-3.07877
ORC4	1.67459	16.085	3.16683	0.011533	0.0236325	-3.08142
YIP3	1.17096	16.9662	3.16338	0.011597	0.0237065	-3.08698
ASN1	2.91398	14.9765	3.16332	0.0115981	0.0237065	-3.08708
SIR2	1.92138	15.0093	3.16267	0.0116102	0.0237065	-3.08813
TRX2	1.21255	20.9331	3.16227	0.0116175	0.0237065	-3.08877
RAD23	1.11365	15.2029	3.16156	0.0116307	0.0237088	-3.08991
GSP2	1.24317	19.1082	3.15336	0.0117847	0.0239977	-3.10314
SAM2	2.05074	16.6303	3.14872	0.0118726	0.0241516	-3.11062
YPR089W	1.47157	16.7395	3.14119	0.0120167	0.0244194	-3.12275
UTP25	1.01545	15.144	3.1368	0.0121017	0.0245667	-3.12984
YPD1	2.17833	17.9646	3.13434	0.0121495	0.0246383	-3.13381
TYS1	2.43264	16.1847	3.13229	0.0121896	0.024694	-3.13712
CCR4	1.31023	18.6484	3.12478	0.0123374	0.0249677	-3.14924
CBS2	1.57758	17.5931	3.12366	0.0123596	0.0249868	-3.15104
TFB2	1.91796	16.6154	3.12143	0.0124038	0.0250376	-3.15463
RPL1A	1.28318	20.3881	3.12111	0.0124103	0.0250376	-3.15516
DBP8	1.01306	18.7309	3.11915	0.0124494	0.0250725	-3.15832
GLT1	1.10213	19.5426	3.11896	0.0124531	0.0250725	-3.15862
TRM3	2.16777	15.5459	3.11559	0.0125207	0.0251827	-3.16406
RCM1	1.66723	15.4964	3.11459	0.0125409	0.0251974	-3.16567
UTP13	1.09847	18.0833	3.11228	0.0125875	0.0252434	-3.1694
NPT1	1.72534	13.4948	3.11163	0.0126006	0.0252434	-3.17045
EFT1	1.00618	21.3259	3.11109	0.0126114	0.0252434	-3.17131
BUD3	1.06597	13.9716	3.1096	0.0126417	0.0252706	-3.17372
YML131W	2.11911	14.8158	3.10756	0.0126833	0.0253278	-3.17702
NCL1	2.15936	16.3415	3.10505	0.0127344	0.025404	-3.18106
CDC53	2.98292	16.591	3.09597	0.0129217	0.0257515	-3.19573
SRP14	1.23755	17.7372	3.09419	0.0129586	0.0257944	-3.19859
DIG1	1.18148	17.1903	3.09344	0.0129743	0.0257944	-3.19981
SPA2	1.61818	15.5826	3.09295	0.0129845	0.0257944	-3.2006
GYP7	1.18424	17.1898	3.09241	0.0129958	0.0257944	-3.20147
TAF1	1.46394	14.9467	3.08907	0.0130657	0.0259069	-3.20686
LSM12	1.56217	20.3029	3.08613	0.0131277	0.0260035	-3.21161
RPL8B	0.929457	21.2332	3.0845	0.0131623	0.0260457	-3.21425
MRS1	1.93165	15.3965	3.08344	0.0131846	0.0260635	-3.21595
RMD1	1.30577	14.2585	3.08199	0.0132154	0.0260981	-3.2183
CYR1	1.42511	14.9033	3.07725	0.0133167	0.0262716	-3.22596
HER2	1.67131	15.0965	3.07264	0.0134159	0.0264408	-3.23341
ERG26	1.19864	17.2315	3.07181	0.0134338	0.0264495	-3.23475
PAM1	2.58277	14.4363	3.07002	0.0134725	0.0264991	-3.23763
RCN2	1.06067	17.7647	3.06621	0.0135553	0.0266352	-3.24378
SLT2	1.27608	17.8113	3.06192	0.0136494	0.0267933	-3.25072
RXT3	2.43722	14.2695	3.05901	0.0137135	0.0268922	-3.25542
NSP1	1.2298	16.9525	3.05828	0.0137296	0.0268969	-3.2566
VPS30	1.5113	17.7642	3.05462	0.0138107	0.0270288	-3.26251
SSZ1	1.31333	19.1588	3.05125	0.013886	0.0271365	-3.26796
OCH1	2.72127	15.0056	3.05092	0.0138934	0.0271365	-3.26849
TFA1	2.5507	14.6178	3.05006	0.0139125	0.0271467	-3.26987
YSH1	1.7293	16.5217	3.04939	0.0139277	0.0271493	-3.27096
TOP2	2.26305	16.6822	3.03863	0.0141712	0.0275965	-3.28834
BOI2	2.03455	16.4349	3.03381	0.0142818	0.0277843	-3.29613
BCH1	1.37468	18.0104	3.03132	0.0143394	0.0278688	-3.30017
PAC10	1.42902	15.7252	3.0295	0.0143815	0.0279229	-3.30311
FAS1	2.22788	17.685	3.02671	0.0144463	0.028021	-3.30761
GCS1	1.16607	16.2753	3.01619	0.0146936	0.0284609	-3.32462
RPS10B	1.10268	20.7911	3.01583	0.0147021	0.0284609	-3.32519
RIA1	1.11461	16.7166	3.01422	0.0147404	0.0285068	-3.3278
APM4	2.33901	15.6072	3.01039	0.014832	0.0286557	-3.334
CHS3	1.23581	14.7581	3.00848	0.0148778	0.028709	-3.33709
CMK2	1.01338	16.61	3.00783	0.0148932	0.028709	-3.33813
CIN2	1.69438	14.5757	3.00719	0.0149086	0.028709	-3.33916
APL5	1.69915	16.4591	3.0068	0.0149181	0.028709	-3.3398
RGA2	3.73957	15.1738	3.00097	0.0150593	0.0289402	-3.34923
RPA43	1.31256	19.0437	3.00062	0.0150678	0.0289402	-3.34979
PRP22	1.96297	15.4934	2.99765	0.0151401	0.0290505	-3.35458
YDR341C	1.72338	17.2015	2.99587	0.0151838	0.0291061	-3.35747
UTP15	1.17876	18.0758	2.99511	0.0152025	0.0291134	-3.3587
UBC4	1.3045	21.7081	2.98937	0.0153442	0.029356	-3.36799
MAK21	0.970402	20.8862	2.98823	0.0153723	0.0293811	-3.36982
SKI3	1.18075	18.2415	2.98513	0.0154495	0.0295	-3.37483
RPC11	1.14725	16.4589	2.97794	0.0156301	0.0298159	-3.38646
RPN11	1.00168	18.1075	2.97734	0.0156455	0.0298162	-3.38744
FDO1	1.17288	14.2079	2.9748	0.0157098	0.0298966	-3.39154
ERG6	1.29101	15.9032	2.97433	0.0157218	0.0298966	-3.39231
PUP3	3.10597	14.5576	2.97387	0.0157334	0.0298966	-3.39305
YCS4	1.23726	14.8772	2.97289	0.0157584	0.0299151	-3.39463
PTI1	0.957831	17.4271	2.97055	0.0158182	0.0299995	-3.39842
GNP1	1.58378	15.2094	2.96945	0.0158462	0.0300236	-3.40019
RPL31B	1.87933	16.5626	2.9676	0.0158938	0.0300847	-3.40319
HSC82	0.99954	21.8804	2.96488	0.0159638	0.0301881	-3.40758
RNA1	1.42408	18.6937	2.96292	0.0160146	0.030255	-3.41076
YKL033W-A	1.14174	24.8436	2.96078	0.01607	0.0303144	-3.41421
SSB2	1.44248	18.8675	2.96052	0.016077	0.0303144	-3.41464
RAI1	2.50622	14.29	2.9584	0.016132	0.0303648	-3.41806
RPS1B	1.18231	19.9834	2.95776	0.0161488	0.0303648	-3.4191
SNF1	2.55043	14.8188	2.95771	0.0161502	0.0303648	-3.41918
RPS7A	1.25702	19.6204	2.95371	0.0162551	0.0305329	-3.42566
SEC27	1.03915	19.4731	2.95182	0.0163047	0.0305967	-3.4287
NOP8	1.62519	17.4189	2.95109	0.0163241	0.0306037	-3.42989
EGD2	0.95275	19.3754	2.95021	0.0163473	0.0306181	-3.43131
SPT15	1.51393	16.9496	2.94843	0.0163945	0.0306771	-3.43419
RPL6B	1.31744	19.7518	2.94562	0.0164694	0.0307764	-3.43874
CDC55	3.03471	15.5889	2.94526	0.016479	0.0307764	-3.43932
NPL4	1.05436	16.6467	2.94419	0.0165075	0.0308004	-3.44105
FPR1	1.05837	21.5558	2.93944	0.0166349	0.0310085	-3.44873
GRX3	1.16633	17.1052	2.9385	0.0166603	0.0310265	-3.45025
PBA1	1.43239	16.178	2.93251	0.0168227	0.0312752	-3.45994
FAP7	1.43193	16.3966	2.9324	0.0168258	0.0312752	-3.46012
PMR1	2.90061	15.2857	2.9284	0.016935	0.0314485	-3.46659
APM3	1.40545	16.6131	2.92561	0.017012	0.0315615	-3.47111
FYV10	1.63454	15.4861	2.9219	0.0171143	0.0317214	-3.4771
COG4	1.54413	14.7904	2.91956	0.0171795	0.031812	-3.48089
RIX7	1.05804	16.7923	2.91882	0.0172	0.03182	-3.48208
SHE4	1.85416	16.1442	2.91515	0.0173028	0.0319801	-3.48803
VIP1	1.18555	18.4549	2.91363	0.0173454	0.0320285	-3.49048
SWI5	1.76549	13.9718	2.91258	0.017375	0.0320531	-3.49218
TFC3	1.60115	14.6225	2.91083	0.0174244	0.0321139	-3.49501
PGC1	1.97978	14.9336	2.90949	0.0174624	0.0321537	-3.49719
RSC2	1.38617	16.1726	2.90626	0.0175538	0.0322918	-3.5024
RPN9	0.940125	18.9571	2.90335	0.0176369	0.0324142	-3.50711
MRPL22	2.15809	17.6392	2.90072	0.0177123	0.0325223	-3.51136
UTP21	1.51166	17.4658	2.89848	0.0177768	0.0326102	-3.51499
VPS28	1.2458	15.4859	2.89577	0.0178553	0.0327236	-3.51938
RPT1	0.945106	19.2691	2.89315	0.0179312	0.0327957	-3.52361
SMI1	1.08834	16.268	2.89267	0.0179451	0.0327957	-3.52438
PDC2	1.18586	15.9566	2.89183	0.0179697	0.0327957	-3.52575
CDC73	1.34985	16.7209	2.8914	0.0179822	0.0327957	-3.52644
CHC1	1.0783	18.907	2.89096	0.017995	0.0327957	-3.52715
MCD1	1.80578	15.3398	2.88293	0.0182311	0.0331951	-3.54014
AEP3	2.47521	14.1996	2.87756	0.0183908	0.0334548	-3.54883
ARF2	1.27445	17.89	2.87628	0.0184292	0.0334936	-3.5509
UBP13	1.09993	17.5897	2.875	0.0184672	0.0335317	-3.55296
MED6	3.09178	14.493	2.87202	0.0185568	0.0336632	-3.55778
LYS1	1.48911	16.8846	2.87001	0.0186176	0.0337422	-3.56104
NTE1	1.83685	15.7219	2.86631	0.0187297	0.0338761	-3.56701
YHB1	3.48241	21.3375	2.86609	0.0187366	0.0338761	-3.56738
POL5	1.99375	18.8374	2.86587	0.0187433	0.0338761	-3.56774
GUS1	1.7478	18.6357	2.86463	0.0187808	0.0339127	-3.56973
TRP5	1.04191	19.5122	2.85967	0.0189329	0.0341558	-3.57776
ADE6	1.84052	14.5184	2.85453	0.0190918	0.0344062	-3.58608
YLH47	1.10873	17.5666	2.85404	0.0191067	0.0344062	-3.58686
IMH1	1.48793	17.7803	2.8491	0.0192607	0.0346517	-3.59485
SEC28	1.42257	18.276	2.84581	0.019364	0.0347697	-3.60017
REH1	1.18179	15.523	2.84532	0.0193795	0.0347697	-3.60097
POM152	1.57966	15.6347	2.84327	0.0194441	0.0348537	-3.60428
COG8	2.06007	17.0666	2.83874	0.019588	0.0350796	-3.61161
MSN4	1.56882	13.8771	2.83576	0.0196831	0.0352176	-3.61643
PYC1	1.2346	14.0789	2.83209	0.0198009	0.0353962	-3.62236
PMD1	1.21581	14.4162	2.82911	0.0198971	0.0355357	-3.62718
POR1	1.29489	18.2113	2.82782	0.0199388	0.0355777	-3.62926
SPE3	1.84304	15.5778	2.82346	0.0200808	0.0357716	-3.63632
NOP2	1.11491	18.7286	2.82289	0.0200995	0.0357716	-3.63724
EXO84	1.59111	15.8914	2.82281	0.0201022	0.0357716	-3.63737
SNX4	1.24569	16.3149	2.8117	0.0204686	0.0363097	-3.65532
LEC1	1.50626	15.2359	2.81132	0.0204814	0.0363097	-3.65594
DIS3	0.904614	17.947	2.81113	0.0204877	0.0363097	-3.65625
MRP13	1.35284	16.8932	2.81097	0.0204928	0.0363097	-3.6565
MCM4	1.2192	17.715	2.81085	0.0204971	0.0363097	-3.65671
SEC23	0.961726	18.649	2.8068	0.0206325	0.0365166	-3.66325
PHB1	1.70696	15.5277	2.8056	0.0206729	0.036555	-3.66519
ABP1	1.30497	17.8269	2.8012	0.0208216	0.0367848	-3.67231
APL6	0.962603	18.3624	2.80043	0.0208474	0.0367972	-3.67354
APM2	2.04912	14.7601	2.79855	0.0209113	0.0368768	-3.67657
SRP101	0.989889	17.5197	2.79534	0.0210209	0.0370368	-3.68176
PUP2	1.2499	18.6571	2.79321	0.0210942	0.0370992	-3.68522
WWM1	1.81551	13.8256	2.79244	0.0211206	0.0371125	-3.68646
MCM3	1.29496	19.2016	2.7914	0.0211561	0.0371374	-3.68813
MAM33	1.1618	17.0109	2.79092	0.0211727	0.0371374	-3.68891
SNQ2	2.50933	14.8522	2.78859	0.0212531	0.0372452	-3.69267
GPP1	0.897951	18.74	2.78599	0.0213436	0.0373514	-3.69689
NUP159	1.30878	17.1299	2.78549	0.0213608	0.0373514	-3.69769
HSP82	1.12412	22.6109	2.7852	0.0213709	0.0373514	-3.69815
SAP185	1.67505	14.7263	2.7805	0.0215351	0.037605	-3.70575
RPP1B	1.68899	19.9268	2.77799	0.0216232	0.0377252	-3.7098
RPN1	0.911115	19.2665	2.77063	0.0218843	0.0381467	-3.7217
SRV2	0.945636	18.7034	2.76609	0.0220466	0.0383956	-3.72903
GCD2	1.18216	17.8251	2.76254	0.0221745	0.038584	-3.73476
KIN1	1.21363	15.936	2.75653	0.0223929	0.0389294	-3.74448
RAD5	1.25433	15.6099	2.74533	0.0228054	0.0395765	-3.76256
TWF1	1.56932	17.4999	2.74462	0.0228316	0.0395869	-3.7637
HDA1	1.92067	14.8194	2.74005	0.0230023	0.0398477	-3.77108
ELG1	1.02067	14.0233	2.73681	0.0231244	0.0400238	-3.77632
ESC1	3.0151	15.0285	2.73576	0.0231638	0.0400567	-3.778
SOG2	1.44092	15.0715	2.73287	0.0232733	0.0402106	-3.78267
NOC4	0.968681	17.4254	2.7323	0.0232948	0.0402122	-3.78358
SEC17	1.15296	15.9186	2.73131	0.0233326	0.040242	-3.78519
ARP7	1.09376	17.7452	2.72858	0.0234366	0.0403859	-3.78959
AAD16	1.69319	15.3808	2.72703	0.0234962	0.0404531	-3.7921
FUN30	1.30319	14.9956	2.72114	0.0237228	0.0408074	-3.8016
FUS3	0.937796	18.5222	2.71853	0.0238239	0.0409454	-3.80581
NUP53	1.14417	15.0421	2.71425	0.0239909	0.0411963	-3.81271
WTM1	1.06145	17.1526	2.71308	0.0240367	0.0412377	-3.8146
RAD27	1.33852	16.9938	2.71257	0.0240571	0.0412377	-3.81544
ADR1	1.12977	14.6256	2.71165	0.024093	0.0412632	-3.81691
UBX4	1.82915	17.1407	2.70672	0.0242874	0.0415599	-3.82486
TEF1	0.991763	25.9371	2.70317	0.0244287	0.0417652	-3.83059
DST1	1.39033	18.253	2.70218	0.0244683	0.0417887	-3.83219
SNF7	0.853702	15.6215	2.70176	0.0244851	0.0417887	-3.83287
DED81	1.27639	17.3443	2.69753	0.0246547	0.0420416	-3.83969
CAF20	1.34065	16.6396	2.69515	0.0247507	0.042136	-3.84353
OLA1	1.10421	21.0841	2.69509	0.024753	0.042136	-3.84363
SNU13	0.957143	22.0834	2.69246	0.0248595	0.0422805	-3.84787
RRP14	1.02178	16.5337	2.68834	0.025027	0.0425286	-3.8545
HSL1	1.38877	14.1996	2.68777	0.0250503	0.0425313	-3.85542
PSY2	1.69583	15.4396	2.68377	0.0252145	0.0427731	-3.86187
SWI6	1.14856	15.5491	2.6828	0.0252546	0.042804	-3.86344
RPN8	1.07909	18.8498	2.68108	0.0253255	0.0428603	-3.86621
IOC2	1.0621	16.9955	2.68094	0.0253315	0.0428603	-3.86644
MEC1	1.31425	15.6653	2.6731	0.0256575	0.0433744	-3.87906
ENO2	1.15977	20.9471	2.67032	0.0257746	0.0435134	-3.88355
GLN4	1.56317	15.9359	2.67009	0.0257841	0.0435134	-3.88392
YPK1	1.46447	18.3524	2.66814	0.0258663	0.0435839	-3.88706
PRP2	1.21761	17.1807	2.66805	0.0258703	0.0435839	-3.88721
INP51	2.05952	13.5999	2.66546	0.0259797	0.0437307	-3.89138
RVS161	0.992675	19.9841	2.66198	0.0261279	0.0439423	-3.89699
TIF6	1.00263	19.124	2.66	0.0262123	0.0440465	-3.90017
STU2	2.28278	15.8092	2.65711	0.0263366	0.0441997	-3.90483
PRP43	1.29272	19.7895	2.65647	0.0263641	0.0441997	-3.90586
DBP9	0.877169	17.8886	2.65631	0.0263711	0.0441997	-3.90612
GCD6	1.22547	19.9164	2.65498	0.0264282	0.0442288	-3.90826
TOM70	1.50025	14.4602	2.65486	0.0264336	0.0442288	-3.90846
MBP1	1.45539	15.1799	2.65421	0.0264615	0.0442378	-3.9095
STH1	1.24819	17.6383	2.65148	0.0265797	0.0443976	-3.91389
QNS1	1.24884	15.8838	2.65009	0.0266401	0.0444607	-3.91613
CEG1	1.45148	14.6861	2.64905	0.0266853	0.0444982	-3.9178
RPG1	1.66971	20.7585	2.64786	0.0267374	0.044525	-3.91972
SSB1	0.96087	22.084	2.64742	0.0267566	0.044525	-3.92043
DET1	0.953914	17.6048	2.64713	0.0267695	0.044525	-3.9209
GCN20	0.957253	17.8971	2.64592	0.0268223	0.044575	-3.92285
VPS13	1.32454	17.7561	2.64438	0.0268899	0.0446495	-3.92532
FAA1	1.19755	16.7279	2.64375	0.0269175	0.0446576	-3.92634
VTC4	2.86768	13.4997	2.63823	0.0271616	0.0450244	-3.93523
CIC1	0.854565	18.1227	2.63628	0.0272482	0.0451299	-3.93837
SAC1	1.51426	15.0112	2.6351	0.0273006	0.0451459	-3.94026
RLP7	1.10446	18.3216	2.63502	0.0273041	0.0451459	-3.94038
GGA1	1.51228	16.8	2.63451	0.0273269	0.0451459	-3.94121
MAK3	0.84398	17.343	2.6304	0.0275109	0.0454115	-3.94781
PUP1	0.924499	17.4433	2.62967	0.027544	0.0454279	-3.949
AAC3	1.45427	17.2715	2.62415	0.0277934	0.0458007	-3.95787
RFS1	1.01501	15.7467	2.62273	0.0278579	0.0458684	-3.96015
GDH1	1.22289	16.0498	2.61732	0.0281053	0.0462138	-3.96886
RPP2A	1.21598	20.8058	2.61712	0.0281148	0.0462138	-3.96919
CHS1	1.43715	14.3236	2.61625	0.0281544	0.0462349	-3.97057
MET5	2.07256	13.4689	2.61581	0.0281748	0.0462349	-3.97128
UGP1	1.69027	19.2699	2.61258	0.0283242	0.0464413	-3.97649
PRP8	1.7405	16.5641	2.61162	0.0283685	0.0464751	-3.97802
NUP2	1.09993	15.8727	2.60995	0.0284462	0.046556	-3.98071
VPS27	0.865958	18.115	2.60942	0.0284708	0.046556	-3.98156
YDR391C	1.66665	17.3738	2.60902	0.0284891	0.046556	-3.9822
ECM16	1.59348	16.6769	2.6072	0.0285742	0.0466562	-3.98513
CCT7	1.19214	18.9407	2.60532	0.0286619	0.0467604	-3.98814
NUP84	0.996069	16.0276	2.60127	0.0288522	0.0470318	-3.99465
EMW1	1.65541	16.4067	2.59824	0.0289955	0.047226	-3.99952
MDV1	1.60852	14.1239	2.59385	0.0292047	0.0475273	-4.00658
RRP15	1.16714	17.417	2.59284	0.0292526	0.0475387	-4.00819
RSC30	1.14734	15.4481	2.59269	0.0292602	0.0475387	-4.00845
YET1	0.88975	18.4851	2.59105	0.0293385	0.0476264	-4.01107
SVF1	2.65948	14.3618	2.59005	0.0293867	0.0476652	-4.01269
TMA64	1.08807	17.5128	2.58871	0.0294511	0.0477303	-4.01484
NOP10	0.998846	20.3511	2.5851	0.0296254	0.047973	-4.02063
NOP16	1.96432	15.5487	2.583	0.0297273	0.0480933	-4.02401
SRP40	0.968881	19.8453	2.58256	0.0297487	0.0480933	-4.02471
HAS1	1.07152	18.0295	2.58007	0.0298699	0.0482324	-4.02871
PRS1	2.2153	15.0374	2.57978	0.0298839	0.0482324	-4.02917
CDC34	1.5171	18.6516	2.57201	0.0302659	0.0488087	-4.04163
YKR018C	1.86464	17.4218	2.56966	0.0303829	0.04893	-4.04542
SQT1	1.04567	16.9766	2.56949	0.030391	0.04893	-4.04568
SEC3	1.52959	18.2081	2.56141	0.0307955	0.0495406	-4.05865
RPL37A	2.15882	19.7808	2.55809	0.0309629	0.049769	-4.06397
YAP1	1.03538	17.4537	2.55709	0.0310135	0.0498096	-4.06557
PEP8	1.13831	15.0295	2.55464	0.0311379	0.0499335	-4.06949
UBA1	0.993457	16.8856	2.55457	0.0311416	0.0499335	-4.06961
KIC1	0.872148	14.86	2.55374	0.0311837	0.0499601	-4.07093
YRF1-1	1.29585	15.4507	2.54967	0.031392	0.0502414	-4.07746
PCT1	1.95168	14.6623	2.54905	0.0314242	0.0502414	-4.07846
RSA4	1.0057	16.222	2.54881	0.0314361	0.0502414	-4.07884
VTC2	0.839781	15.9489	2.54634	0.0315636	0.0504041	-4.0828
FRS2	1.17856	16.9841	2.54551	0.0316066	0.0504317	-4.08414
SEH1	1.14385	18.583	2.54404	0.0316822	0.0505113	-4.08648
CTR9	1.13761	18.2178	2.54136	0.0318217	0.050691	-4.09078
GSF2	1.13616	15.6093	2.54088	0.0318466	0.050691	-4.09155
NNF1	0.85273	15.1919	2.54005	0.0318899	0.0507187	-4.09288
VTS1	2.13559	15.2357	2.53902	0.0319437	0.050763	-4.09453
EMP47	1.34121	16.2648	2.53825	0.0319837	0.0507854	-4.09575
UFD1	0.996351	15.1526	2.53464	0.0321734	0.0509711	-4.10155
GPA1	2.73682	14.4864	2.53422	0.0321954	0.0509711	-4.10222
NAP1	1.10168	19.1883	2.53419	0.0321969	0.0509711	-4.10226
VMA6	1.03246	19.2472	2.53404	0.0322046	0.0509711	-4.1025
RAD52	1.05008	16.7591	2.5301	0.0324131	0.0512598	-4.10882
HCH1	0.989232	20.4551	2.52857	0.0324944	0.0513469	-4.11127
PDX3	1.537	14.0467	2.52773	0.032539	0.0513744	-4.11261
PRR1	1.66379	14.5334	2.52688	0.0325842	0.0513744	-4.11397
NTH1	0.942608	17.2472	2.52641	0.032609	0.0513744	-4.11471
KRS1	1.45205	17.0179	2.52591	0.0326359	0.0513744	-4.11552
MSN5	1.32312	15.7092	2.52578	0.0326428	0.0513744	-4.11573
HIS4	1.64053	14.8302	2.52481	0.0326945	0.0514145	-4.11727
NPL6	1.0977	17.4174	2.52317	0.0327824	0.0515114	-4.1199
SDS3	1.3385	13.0551	2.52112	0.0328924	0.0516224	-4.12318
IST1	1.29219	16.0991	2.52039	0.032932	0.0516224	-4.12436
SFM1	1.20428	15.8026	2.5176	0.0330824	0.0518168	-4.12881
YNL193W	1.12446	13.9231	2.51517	0.033214	0.0519813	-4.1327
SDH1	0.99105	17.0829	2.51294	0.0333357	0.0521302	-4.13627
CYS3	1.12174	17.514	2.50342	0.0338588	0.0528655	-4.1515
SEC5	3.38486	15.7964	2.50255	0.0339071	0.0528972	-4.15289
NMD3	1.50621	14.4755	2.50066	0.0340117	0.0530183	-4.1559
DHR2	0.78464	17.2683	2.49979	0.0340605	0.0530522	-4.1573
AIR2	2.35719	14.8102	2.49895	0.0341071	0.0530825	-4.15863
SES1	1.76728	16.22	2.49539	0.0343061	0.0533499	-4.16432
SNF5	0.986826	17.8483	2.49414	0.0343766	0.0534172	-4.16632
TUB4	1.39876	13.9378	2.49327	0.0344254	0.0534506	-4.16771
PRS5	0.943299	16.3445	2.49238	0.0344755	0.0534862	-4.16913
NSA1	0.91804	16.6233	2.48961	0.0346324	0.053687	-4.17356
ADE4	1.13526	19.7936	2.48718	0.0347701	0.0538579	-4.17744
TSL1	1.22624	15.7866	2.48578	0.0348497	0.0539383	-4.17967
NUP157	0.91732	14.2771	2.4853	0.034877	0.0539383	-4.18044
YMR099C	1.20295	14.9361	2.47751	0.0353244	0.0545872	-4.19287
EFB1	1.01631	20.3634	2.47352	0.0355555	0.054901	-4.19924
RSC3	0.825404	20.2587	2.47272	0.0356018	0.0549293	-4.20051
PRE1	1.00535	17.2586	2.46723	0.0359231	0.0553814	-4.20927
MRPS18	1.1742	15.1788	2.46278	0.0361854	0.0557421	-4.21636
TFC7	1.33695	13.8091	2.46125	0.0362763	0.0558382	-4.21881
HHO1	3.12605	15.4006	2.4589	0.0364159	0.056009	-4.22255
ERB1	0.971174	17.8078	2.45683	0.0365392	0.0561183	-4.22584
SER1	1.43545	17.6168	2.45675	0.0365442	0.0561183	-4.22598
YRB30	1.14771	16.1256	2.45228	0.0368121	0.0564855	-4.23309
ARL3	1.01004	15.9053	2.45172	0.036846	0.0564934	-4.23399
SAN1	1.53078	15.2121	2.44782	0.0370816	0.0568101	-4.2402
ERG13	0.857038	17.0079	2.44672	0.0371486	0.0568684	-4.24195
PEA2	1.01342	15.635	2.44389	0.0373211	0.0570878	-4.24646
KAR4	1.2372	16.1132	2.44254	0.0374034	0.0571691	-4.24861
RUD3	0.777291	15.5443	2.44196	0.037439	0.057179	-4.24953
RVB2	1.19276	19.6213	2.43701	0.0377431	0.0575986	-4.25741
CNB1	0.793042	16.3977	2.43538	0.0378438	0.0576876	-4.26
TIF5	0.935756	18.263	2.43511	0.0378602	0.0576876	-4.26042
GID8	0.921621	16.3619	2.4343	0.0379105	0.0577193	-4.26171
ADH6	1.04135	15.4145	2.42607	0.0384244	0.0584227	-4.27481
YCF1	1.98597	13.9099	2.42595	0.038432	0.0584227	-4.275
KSP1	2.06325	15.192	2.42461	0.0385159	0.0585048	-4.27712
CPR6	0.7819	17.1203	2.42365	0.0385766	0.0585516	-4.27865
RTN1	0.943996	17.8119	2.41941	0.038845	0.0589067	-4.28539
SCS2	0.924516	16.142	2.419	0.0388706	0.0589067	-4.28603
YPP1	0.865075	18.3254	2.41512	0.0391183	0.0592363	-4.29221
SRB2	1.2406	16.1907	2.41413	0.0391817	0.0592865	-4.29378
PAA1	1.00847	19.1767	2.40993	0.0394513	0.0596484	-4.30044
ANP1	2.31601	15.9151	2.40555	0.0397352	0.0600314	-4.30741
NUP57	1.20541	16.1167	2.40146	0.0400016	0.0603874	-4.31389
UBP15	2.30568	17.4024	2.4002	0.0400839	0.060465	-4.31589
IVY1	1.39305	17.4385	2.39902	0.0401612	0.0605351	-4.31776
GSY2	1.13843	14.93	2.39601	0.0403596	0.0607874	-4.32254
GCD7	0.920688	20.2786	2.39548	0.0403943	0.060793	-4.32337
PUF4	2.87591	18.3329	2.39294	0.0405622	0.0609634	-4.3274
TDH3	1.57767	20.8686	2.39283	0.0405697	0.0609634	-4.32758
CYM1	1.72566	14.2065	2.38617	0.0410137	0.0615833	-4.33813
BGL2	0.968794	16.6156	2.38183	0.041306	0.0619419	-4.34502
COG5	1.18474	14.43	2.38168	0.0413156	0.0619419	-4.34524
MTF2	1.42069	15.9618	2.37646	0.0416695	0.0623614	-4.35351
VID30	1.21846	16.9446	2.37641	0.041673	0.0623614	-4.35359
ERG27	1.16742	15.0269	2.37615	0.0416909	0.0623614	-4.35401
TY2B-C	1.05665	18.4861	2.37396	0.0418403	0.0625054	-4.35747
CUB1	0.955848	15.7783	2.37381	0.0418509	0.0625054	-4.35772
CDC9	0.98393	17.2213	2.36001	0.0428049	0.0638816	-4.37954
OXP1	0.811037	14.828	2.35497	0.0431587	0.0643607	-4.38751
VPS3	1.26755	16.1298	2.35434	0.0432034	0.0643784	-4.38851
GSC2	1.12426	19.1896	2.35381	0.0432402	0.0643843	-4.38933
IMP3	1.06377	17.1803	2.35233	0.0433455	0.0644598	-4.39169
COG6	1.73788	16.3786	2.35217	0.0433567	0.0644598	-4.39194
SEC13	1.03669	18.5628	2.35166	0.043393	0.0644649	-4.39274
NOP7	0.800552	18.6563	2.34945	0.0435495	0.064646	-4.39623
ARF1	0.85501	20.722	2.34901	0.0435808	0.064646	-4.39692
BRX1	0.940781	18.4518	2.34807	0.0436477	0.0646963	-4.39841
MEU1	1.05037	20.0633	2.3458	0.0438098	0.0648454	-4.40199
COG3	1.19125	15.4607	2.34574	0.0438144	0.0648454	-4.40209
PHO88	1.06254	16.5035	2.33796	0.0443748	0.0655869	-4.41437
COF1	1.66025	17.6793	2.33785	0.0443823	0.0655869	-4.41454
VPS9	1.40145	15.8717	2.33474	0.0446086	0.0658716	-4.41945
NOP1	0.811626	21.9707	2.33153	0.0448429	0.0661678	-4.42451
PRB1	1.06124	17.6109	2.32867	0.0450525	0.0664271	-4.42901
ARP5	1.03979	16.5106	2.3226	0.0455011	0.067038	-4.43858
PGI1	1.7327	18.0925	2.32131	0.0455972	0.0671292	-4.44061
VPS29	1.40508	16.1389	2.31893	0.0457748	0.0672896	-4.44436
RPN10	0.922631	16.9701	2.31503	0.0460669	0.0676177	-4.4505
SEC24	0.814623	18.4122	2.31238	0.046267	0.0678606	-4.45468
YGR210C	0.820906	14.3841	2.31185	0.0463064	0.0678676	-4.4555
ARI1	1.09968	15.6517	2.30822	0.0465815	0.0682199	-4.46121
DAS2	1.54785	15.411	2.30519	0.0468125	0.068507	-4.46598
LDO45	2.78104	14.0312	2.29924	0.0472697	0.0691244	-4.47534
ADE17	1.94882	14.2538	2.29254	0.0477887	0.0697996	-4.48586
SUI2	1.0329	19.6226	2.29236	0.0478026	0.0697996	-4.48614
INO80	0.986782	16.8777	2.2911	0.0479012	0.0698916	-4.48813
FBA1	1.33587	19.0429	2.28989	0.0479956	0.0699772	-4.49002
RTG3	1.34405	14.593	2.2849	0.0483881	0.0704971	-4.49786
MPE1	1.06749	13.7183	2.27969	0.0488011	0.071046	-4.50604
DDI1	1.29062	15.7755	2.2788	0.0488717	0.071096	-4.50742
SPT16	0.913159	17.2052	2.27525	0.0491555	0.0714559	-4.51299
MPM1	1.4617	17.4186	2.27049	0.0495388	0.0719597	-4.52046
PTC2	1.39847	14.3906	2.2669	0.049829	0.0723277	-4.52607

## Sheet: (2) Interactome mutant
Interactome mutant
Symbol	log2FC_tt_Puf3_dNot4_vs_NoTag	AveExpr	t	P.Value	adj.P.Val	B
Puf3_TAP	13.9254	21.5926	36.4178	5.05985e-11	9.92236e-08	13.4269
STE20	8.06159	21.708	20.7441	7.29147e-09	7.14929e-06	10.4845
RRM3	4.87764	16.3532	15.2427	1.06631e-07	6.97011e-05	8.31869
MRPL51	4.94856	17.1819	14.4155	1.72436e-07	7.71231e-05	7.89636
MRM1	4.43872	15.3387	14.0196	2.19018e-07	7.71231e-05	7.68289
ELP4	4.03858	15.7756	13.4738	3.07751e-07	7.71231e-05	7.37562
RMD9	4.88894	17.3741	13.3499	3.33029e-07	7.71231e-05	7.30372
MRPL13	4.97471	17.6797	13.3016	3.43498e-07	7.71231e-05	7.27547
MRPL9	4.61351	17.2778	13.1239	3.85286e-07	7.71231e-05	7.17039
MRPL28	4.4049	17.271	13.0585	4.02074e-07	7.71231e-05	7.13124
AEP2	5.4936	16.4996	12.936	4.35704e-07	7.71231e-05	7.05733
IMG2	4.78544	16.5033	12.8152	4.71941e-07	7.71231e-05	6.98361
MRP7	5.30995	16.3712	12.5962	5.46452e-07	7.93352e-05	6.84781
MRPL10	4.70747	16.5566	12.5432	5.66391e-07	7.93352e-05	6.8145
MRPL8	3.82956	16.3025	12.2891	6.7384e-07	8.12559e-05	6.65248
RPM2	6.49195	17.0451	12.2552	6.89824e-07	8.12559e-05	6.63055
MRPL4	5.04962	17.0041	12.2249	7.04411e-07	8.12559e-05	6.61095
IRC19	6.19055	16.4641	12.1334	7.50726e-07	8.17874e-05	6.55124
RRG8	5.68674	16.3948	12.0071	8.20192e-07	8.25249e-05	6.46804
AEP1	4.69069	16.5363	11.905	8.81611e-07	8.25249e-05	6.39998
PAB1	4.33095	23.1049	11.9016	8.83744e-07	8.25249e-05	6.3977
MRPL3	5.29624	17.9531	11.4873	1.19151e-06	0.000106207	6.11445
RML2	4.17269	16.0999	11.3357	1.33235e-06	0.000109152	6.00789
MRPL35	4.06718	17.9305	11.3113	1.35673e-06	0.000109152	5.99056
ATP25	5.47753	16.192	11.2772	1.39154e-06	0.000109152	5.96634
SMD1	3.68189	16.9744	11.0992	1.5903e-06	0.000119946	5.8384
RRG1	5.86089	16.3247	10.9306	1.8078e-06	0.000126858	5.71512
MRPL33	5.14723	16.4019	10.9159	1.82828e-06	0.000126858	5.70426
MHR1	3.93868	16.7768	10.8823	1.87602e-06	0.000126858	5.67941
MRPL7	3.56278	16.4194	10.6989	2.16216e-06	0.000141333	5.54226
HEK2	4.06774	19.3986	10.5952	2.34505e-06	0.000148343	5.46358
MRPL23	4.50459	16.5949	10.3685	2.80762e-06	0.000164617	5.28856
UTP22	3.2113	19.474	10.3573	2.83276e-06	0.000164617	5.27988
MRPL20	3.55333	18.5971	10.348	2.85415e-06	0.000164617	5.27255
NAB2	3.41788	17.9781	10.1678	3.30188e-06	0.000184999	5.13027
MRPL36	4.38434	15.8178	10.0858	3.53083e-06	0.000187848	5.06465
MRPL11	4.18696	16.9526	10.0812	3.54431e-06	0.000187848	5.06091
CCM1	3.90168	15.5793	9.90421	4.10287e-06	0.00021173	4.9173
NAM7	4.14007	18.2589	9.68738	4.9238e-06	0.00023695	4.73767
CUS1	3.35388	16.6876	9.64065	5.12349e-06	0.00023695	4.69842
MRPL24	4.14385	15.9134	9.63385	5.15331e-06	0.00023695	4.69269
IRC25	3.76472	15.8027	9.63162	5.16311e-06	0.00023695	4.69081
MRPL1	4.52037	16.7537	9.62424	5.19573e-06	0.00023695	4.68459
PUS7	2.85511	16.9646	9.50444	5.75841e-06	0.000250292	4.58289
STO1	3.31717	18.5025	9.48714	5.84508e-06	0.000250292	4.5681
MRPS35	3.47197	15.4851	9.48198	5.8712e-06	0.000250292	4.56369
NAM9	3.58112	15.8223	9.25758	7.14208e-06	0.000297992	4.36923
SBP1	3.27077	21.8115	9.20441	7.48578e-06	0.000305825	4.32248
TIF4632	2.93524	16.8507	9.09115	8.28036e-06	0.000331384	4.22198
FAB1	3.07194	15.3913	9.0319	8.73273e-06	0.000342498	4.16892
TIF4631	2.89021	19.8536	8.9501	9.40249e-06	0.000361535	4.09511
YGR250C	4.2297	16.1775	8.80097	1.07741e-05	0.000406308	3.95885
MRPL49	3.78496	15.081	8.66083	1.2266e-05	0.000441426	3.82878
RNA15	3.3532	16.3171	8.65545	1.23276e-05	0.000441426	3.82376
SLF1	3.30845	16.998	8.65084	1.23806e-05	0.000441426	3.81944
NAM8	2.75433	15.2284	8.60816	1.28843e-05	0.000451179	3.77939
FCP1	3.11541	14.6457	8.54534	1.3667e-05	0.000466072	3.7201
MRX1	2.43597	18.6003	8.53622	1.37849e-05	0.000466072	3.71146
SPT3	2.79007	14.7812	8.43304	1.51997e-05	0.000505197	3.61309
EAF1	3.05053	15.3733	8.33055	1.67647e-05	0.000547927	3.51427
VAR1	3.35049	15.2931	8.21565	1.87332e-05	0.000602225	3.40215
SNU71	3.31748	16.7209	8.17931	1.94075e-05	0.000608046	3.36639
LSM4	2.45563	18.5404	8.17263	1.95344e-05	0.000608046	3.3598
YGR054W	2.30832	17.2547	8.14393	2.00897e-05	0.00061463	3.33144
YML6	4.01517	18.0227	8.12051	2.05558e-05	0.00061463	3.30823
PRP40	3.25562	15.2727	8.10382	2.08954e-05	0.00061463	3.29164
THP2	3.20336	16.1995	8.09875	2.09996e-05	0.00061463	3.28661
PUS1	3.38848	16.9754	8.07685	2.14569e-05	0.000618779	3.26479
HRR25	3.59977	18.3528	8.03933	2.2266e-05	0.000632805	3.2273
PET127	4.79071	16.3939	7.92951	2.48328e-05	0.000689606	3.11665
SRB7	3.37816	15.34	7.83778	2.72269e-05	0.000728372	3.02318
YBR238C	2.96704	14.9947	7.83022	2.74351e-05	0.000728372	3.01545
MRPL15	3.9695	18.0883	7.82839	2.74857e-05	0.000728372	3.01357
LUC7	2.88726	15.0248	7.8067	2.80946e-05	0.00073458	2.9913
RRG9	3.19531	16.7488	7.76169	2.94054e-05	0.000758738	2.94493
MRPL25	4.11606	15.8918	7.70528	3.11442e-05	0.000793165	2.88648
MRP49	3.49343	17.2774	7.68644	3.17496e-05	0.000798219	2.86688
PAP2	3.19382	15.4404	7.66921	3.23148e-05	0.000802145	2.84891
DUS3	2.29045	16.7927	7.64356	3.31764e-05	0.000810137	2.82211
UTP14	2.31716	17.5018	7.62762	3.37249e-05	0.000810137	2.8054
CHS5	2.26502	17.7115	7.62327	3.38762e-05	0.000810137	2.80084
MRPL17	4.75628	17.6724	7.54373	3.67789e-05	0.000868956	2.71703
SQS1	2.73973	16.4842	7.49146	3.88346e-05	0.000906603	2.66154
ESF2	2.14547	16.9384	7.47095	3.96753e-05	0.000915333	2.63968
SMB1	2.3379	16.2666	7.45255	4.04465e-05	0.000921729	2.62002
CBC2	2.40445	18.4851	7.44208	4.08926e-05	0.000921729	2.60882
NAT3	2.28868	16.7337	7.36426	4.4383e-05	0.000989035	2.52513
TRS31	2.37453	16.5196	7.32595	4.62205e-05	0.00101841	2.48366
MNN11	2.84699	19.2678	7.28293	4.83832e-05	0.00105422	2.43688
PRP42	2.43705	15.7712	7.26504	4.93153e-05	0.00106272	2.41735
TES1	2.60727	16.4987	7.20604	5.25306e-05	0.00111341	2.3527
MSL5	2.32613	15.1266	7.20122	5.28031e-05	0.00111341	2.3474
HSH155	2.927	16.6706	7.18364	5.38113e-05	0.00112259	2.32803
PAT1	2.20598	18.3072	7.06451	6.12206e-05	0.00124867	2.1958
SNP1	2.48742	14.9544	7.06248	6.13562e-05	0.00124867	2.19353
EAP1	2.78469	17.898	7.05639	6.1765e-05	0.00124867	2.18672
XRN1	2.34948	19.5353	7.03085	6.35116e-05	0.00127088	2.15811
GCD14	3.45663	16.7913	6.97988	6.71607e-05	0.00133032	2.10078
ESA1	3.20784	14.6632	6.94349	6.99065e-05	0.00137087	2.05964
SNF6	2.80838	16.2736	6.91874	7.1844e-05	0.00139491	2.03156
MRPS28	3.09895	15.2216	6.88834	7.43054e-05	0.00142856	1.99695
LHP1	2.15689	18.0629	6.87281	7.55976e-05	0.00143929	1.97923
LSM1	2.51345	17.057	6.8046	8.15725e-05	0.00153584	1.90103
PET54	3.28312	15.9905	6.79738	8.22353e-05	0.00153584	1.89271
AAD16	3.76386	15.3808	6.77752	8.40865e-05	0.0015556	1.86981
RRB1	2.76748	18.4868	6.70144	9.16144e-05	0.00167351	1.78158
MUD1	3.35161	15.7777	6.69613	9.21665e-05	0.00167351	1.77539
IMG1	2.48658	16.7048	6.68061	9.38015e-05	0.00168692	1.75729
PBP4	2.18921	18.7367	6.6409	9.81303e-05	0.00173364	1.71083
SWP82	2.0554	15.1283	6.56576	0.000106931	0.00187226	1.62233
MOT2	2.86297	15.9269	6.54879	0.000109037	0.00189222	1.60224
RBG1	1.97366	17.9201	6.52813	0.00011166	0.00192076	1.57772
MPD1	2.0811	16.242	6.51175	0.00011379	0.00194037	1.55824
RAD3	2.12494	17.6135	6.50216	0.000115056	0.00194504	1.54683
YHB1	7.03263	21.3375	6.47117	0.000119258	0.00199884	1.50984
MLC1	2.87356	18.9516	6.45584	0.000121397	0.00201746	1.4915
SOV1	2.32326	16.5355	6.42942	0.000125185	0.00204631	1.4598
MRP51	2.82704	15.1961	6.42917	0.000125221	0.00204631	1.4595
MTR4	2.10323	17.7475	6.41224	0.000127716	0.00206984	1.43914
NRD1	2.51087	16.1865	6.39641	0.000130099	0.00209117	1.42007
PDR16	2.65839	18.4615	6.37494	0.000133407	0.00210976	1.39415
MBF1	2.27992	18.6281	6.36171	0.000135492	0.00212559	1.37814
RCO1	2.59684	16.2876	6.34478	0.00013821	0.00215104	1.35762
LSM6	1.99615	17.1501	6.32289	0.000141815	0.00218975	1.33104
BRR1	2.43646	15.7075	6.30682	0.000144527	0.0022142	1.31147
NSE3	2.53829	14.8846	6.29727	0.000146165	0.00222194	1.29983
HSH49	3.27148	16.0812	6.29009	0.000147409	0.00222249	1.29108
MNP1	2.07902	18.368	6.28404	0.000148468	0.00222249	1.28368
POL31	2.58713	14.9515	6.25955	0.000152835	0.00227052	1.25374
SPT7	2.43995	16.377	6.24368	0.00015574	0.00227472	1.23428
DEP1	2.31824	15.9397	6.23729	0.000156928	0.00227472	1.22643
GCN5	2.50219	15.0542	6.22478	0.000159279	0.00227472	1.21106
ARO1	2.55261	19.2746	6.21936	0.00016031	0.00227472	1.20439
MDM20	2.24268	17.4327	6.2193	0.000160321	0.00227472	1.20432
RPO21	1.70933	18.3694	6.20625	0.000162833	0.00227472	1.18825
UTP23	1.9097	17.7635	6.20346	0.000163376	0.00227472	1.18481
PXP1	2.51608	16.6505	6.20269	0.000163526	0.00227472	1.18386
CBP2	4.02308	15.5281	6.20253	0.000163557	0.00227472	1.18366
HFI1	2.77036	16.0731	6.18758	0.000166502	0.00229936	1.16522
RBS1	2.52742	14.7967	6.17758	0.000168505	0.00230167	1.15285
GFD1	2.21202	14.8396	6.17505	0.000169016	0.00230167	1.14972
YDR132C	3.0968	15.2649	6.15696	0.000172717	0.00233585	1.12733
YMR102C	2.34253	15.443	6.12522	0.000179424	0.00240994	1.08793
RTT101	2.44795	15.3086	6.09136	0.000186897	0.00249323	1.04573
SUB1	1.85282	16.9121	6.08443	0.000188466	0.00249355	1.03708
NOP4	1.79838	18.7594	6.08006	0.000189464	0.00249355	1.03161
SDO1	1.70113	16.0204	6.06782	0.000192288	0.00250355	1.01631
NGR1	1.91809	15.6275	6.06573	0.000192777	0.00250355	1.01368
PDR5	3.28444	16.7901	5.98752	0.000212001	0.00272382	0.915308
MGM101	2.27614	19.8911	5.98553	0.000212516	0.00272382	0.912797
RPD3	2.0161	17.6261	5.9773	0.000214663	0.00273347	0.902392
MRPL6	3.0415	15.6671	5.93504	0.000226066	0.0028601	0.848806
YDR239C	1.73793	15.0358	5.90708	0.000233969	0.00294111	0.813223
GAL83	2.63265	14.6904	5.89042	0.000238822	0.002983	0.791962
ICT1	2.45047	15.0772	5.88513	0.000240385	0.00298352	0.785206
SLM5	1.78507	14.6674	5.83355	0.00025623	0.00316017	0.719083
RRP42	2.03892	16.5251	5.81874	0.000260985	0.0031987	0.700033
SGN1	3.34805	16.6181	5.79552	0.000268639	0.00327205	0.670084
LRP1	1.67806	15.5786	5.78177	0.000273282	0.00330807	0.652325
PEP8	2.29745	15.0295	5.76463	0.000279197	0.00335893	0.630135
PRI2	2.32215	15.6057	5.7583	0.000281415	0.00336497	0.621935
HER1	1.60922	17.06	5.74964	0.000284484	0.00338105	0.610694
HRB1	2.12918	17.0821	5.73108	0.000291178	0.00343976	0.586586
NPR3	2.04861	15.3638	5.71033	0.000298867	0.00349191	0.55957
YIL055C	2.07977	15.2211	5.70496	0.000300892	0.00349191	0.552568
FBP26	2.39592	15.8263	5.70485	0.000300934	0.00349191	0.552423
RNH70	4.29198	14.6919	5.68149	0.000309922	0.00357504	0.521917
YHM2	2.05884	16.9016	5.6664	0.000315882	0.00362249	0.502165
NAB6	1.72195	18.5403	5.64394	0.000324985	0.0037052	0.47271
MSC6	2.27248	16.1414	5.63918	0.000326952	0.00370609	0.466451
SGF73	2.08883	15.6681	5.62425	0.000333199	0.00375519	0.446825
RPL36A	1.6529	19.5165	5.59736	0.000344786	0.00386357	0.411375
PRP31	1.63181	14.4032	5.5841	0.000350659	0.00390706	0.393858
ACP1	2.87922	16.3139	5.56816	0.000357862	0.00394134	0.372768
YRA1	2.25559	19.0501	5.5652	0.000359217	0.00394134	0.368847
NDE1	2.51163	15.614	5.56401	0.000359765	0.00394134	0.367266
BIM1	1.73177	16.8003	5.53354	0.00037407	0.00407529	0.32682
SRO9	1.51361	21.5386	5.5129	0.000384109	0.00416153	0.299348
TMA46	1.79566	17.4323	5.50364	0.000388708	0.00418822	0.287002
MDH3	1.67801	17.9557	5.48594	0.000397665	0.00423981	0.263366
RNQ1	2.40225	21.1515	5.48563	0.00039782	0.00423981	0.262962
POL1	2.41137	17.6328	5.4756	0.000403	0.00425163	0.24954
GEP5	3.23219	14.7425	5.46917	0.000406354	0.00425163	0.240939
POL3	1.74879	15.5852	5.4669	0.000407549	0.00425163	0.237893
PET309	2.456	15.0571	5.4668	0.000407602	0.00425163	0.237759
PAN2	2.18236	14.4799	5.44371	0.000419949	0.00433511	0.206794
GPB1	1.69622	15.6943	5.44357	0.000420026	0.00433511	0.206605
EMG1	1.74861	18.5404	5.4184	0.000433948	0.00443166	0.172767
PUS4	2.62747	14.4675	5.41381	0.000436542	0.00443166	0.166584
RFC5	1.8327	17.6957	5.40943	0.000439032	0.00443166	0.160682
SRB4	1.98574	16.1202	5.40659	0.000440655	0.00443166	0.156851
TRS130	2.82953	15.1171	5.40655	0.000440681	0.00443166	0.156792
ERV41	1.84835	16.1067	5.39913	0.000444953	0.0044518	0.14678
YNL050C	1.46916	16.9221	5.37546	0.000458878	0.00456523	0.1148
RGR1	1.64829	16.5913	5.37201	0.000460946	0.00456523	0.110133
RPB2	1.57339	18.697	5.3493	0.000474821	0.00466994	0.0793546
EPL1	1.94811	15.4912	5.34695	0.000476282	0.00466994	0.0761662
SKI8	1.55058	17.7171	5.33948	0.000480956	0.00469231	0.0660299
MRP20	2.05082	17.7105	5.33423	0.000484277	0.00470132	0.0588888
POP1	1.66305	14.629	5.30982	0.000500029	0.00483033	0.0256664
RDH54	2.66158	15.6582	5.30182	0.000505308	0.00483458	0.0147652
CTF18	2.08507	14.8747	5.30168	0.000505399	0.00483458	0.0145774
PBP2	2.00918	17.0649	5.29699	0.000508529	0.0048409	0.00816987
LEA1	2.05014	15.705	5.29256	0.000511497	0.00484563	0.0021296
VAC14	1.64529	17.0009	5.28198	0.000518669	0.00488995	-0.0123239
GEP3	2.0055	15.1412	5.27428	0.00052396	0.00491073	-0.0228594
SPT20	2.51593	16.1034	5.2715	0.000525881	0.00491073	-0.0266583
MMS1	2.27542	15.8416	5.25572	0.000536949	0.00499032	-0.0482781
SPT8	1.94285	16.2622	5.25152	0.000539936	0.00499441	-0.054036
NGG1	2.1122	15.8585	5.24007	0.000548171	0.00504677	-0.0697483
TOR2	2.41743	15.9762	5.21783	0.000564551	0.00517329	-0.100314
MRN1	1.88878	18.7124	5.20885	0.000571316	0.00520898	-0.112679
RSE1	2.47049	16.9118	5.20564	0.000573758	0.00520898	-0.117106
MRX5	2.53384	14.983	5.19369	0.000582938	0.00526793	-0.133584
UBP8	2.06887	14.7696	5.18122	0.000592692	0.00533151	-0.150811
DBP2	1.49934	18.0873	5.17709	0.00059596	0.00533499	-0.15652
YML119W	2.26585	15.7785	5.17387	0.00059852	0.00533499	-0.16097
UME1	2.01698	16.947	5.16442	0.000606107	0.00537817	-0.174047
IMP4	1.61846	17.6255	5.12819	0.000636173	0.00559997	-0.224307
HSP42	2.07755	18.1012	5.12536	0.000638587	0.00559997	-0.228239
IPI1	1.63386	16.038	5.12409	0.000639671	0.00559997	-0.229999
SBE22	2.03734	15.0339	5.11181	0.000650292	0.00564258	-0.247096
KRR1	2.03388	18.2724	5.10022	0.00066048	0.00568148	-0.263234
ORC1	1.64465	16.2755	5.10012	0.00066057	0.00568148	-0.263376
GCD10	2.81984	16.6374	5.02957	0.000726469	0.00619471	-0.362097
PRP11	1.88385	15.9464	5.02662	0.000729376	0.00619471	-0.366244
BRE5	2.37802	15.2418	5.02627	0.000729718	0.00619471	-0.366731
PUF2	2.09875	15.5116	5.01324	0.000742712	0.00627148	-0.385054
HPR1	2.39251	16.4392	5.01081	0.000745158	0.00627148	-0.388468
SWI1	2.6733	16.0205	5.00089	0.000755254	0.00632928	-0.402439
GIS2	1.69029	16.7898	4.9662	0.000791733	0.00660296	-0.451408
LYS4	2.43821	16.5047	4.9635	0.000794645	0.00660296	-0.455219
ELP2	2.04539	16.8801	4.93942	0.00082118	0.00679466	-0.489318
TOM40	2.06941	16.1671	4.92194	0.000841044	0.00692978	-0.51413
TFB1	1.89082	15.7046	4.91128	0.000853414	0.00698386	-0.529286
MRPL40	2.16218	18.6995	4.91015	0.000854731	0.00698386	-0.530887
POL12	1.88412	17.0655	4.90297	0.000863191	0.00702373	-0.541111
ADA2	1.74548	14.9365	4.89306	0.000875003	0.00709042	-0.555219
KGD1	2.01214	17.5125	4.88703	0.000882278	0.00711995	-0.563814
BET3	1.81893	16.9669	4.86379	0.000910934	0.00732107	-0.596992
RCM1	2.32704	15.4964	4.86032	0.000915299	0.00732613	-0.601954
RPP1	1.7949	15.8584	4.8539	0.000923424	0.00734385	-0.611128
RXT2	1.87077	16.7393	4.85266	0.000925003	0.00734385	-0.6129
GIP3	1.41638	15.4972	4.84817	0.000930744	0.00734945	-0.619323
NHP2	1.32671	20.8555	4.84626	0.000933203	0.00734945	-0.622062
BMS1	3.31632	18.793	4.82291	0.000963798	0.00756003	-0.655544
ERG27	2.11747	15.0269	4.81857	0.000969593	0.00757518	-0.661765
HYM1	1.96645	16.8819	4.80666	0.000985714	0.00767057	-0.678879
KIN1	1.8866	15.936	4.79084	0.00100757	0.00780966	-0.701639
YMR130W	1.52708	16.2789	4.78423	0.00101686	0.00785062	-0.711162
AIR1	2.16676	14.2668	4.76134	0.00104974	0.00807271	-0.74419
LYS2	2.52722	14.148	4.75516	0.00105881	0.00811064	-0.753116
PUB1	1.66237	20.7509	4.73172	0.00109399	0.00832549	-0.787035
CAF40	1.89485	16.432	4.73083	0.00109535	0.00832549	-0.788322
BFR1	1.67408	19.8927	4.70747	0.00113171	0.00855547	-0.822208
RPL26B	1.53614	21.2286	4.70581	0.00113433	0.00855547	-0.824608
NSR1	1.31175	20.4818	4.69976	0.00114399	0.00859523	-0.833402
UTP4	1.70904	17.8198	4.69341	0.00115421	0.00863893	-0.842631
TRS20	2.03488	15.1713	4.68286	0.00117142	0.00873445	-0.857992
DPB3	2.68094	17.4914	4.67727	0.00118064	0.00876984	-0.866124
SAP155	1.4487	18.3959	4.67086	0.00119131	0.00880159	-0.875458
WRS1	1.53373	16.4181	4.66932	0.00119389	0.00880159	-0.877703
TAF12	2.75372	17.8932	4.66191	0.0012064	0.00882842	-0.888518
LYS12	1.93399	20.3529	4.66168	0.00120678	0.00882842	-0.888844
RPL3	1.34368	21.3622	4.65521	0.00121782	0.00882842	-0.898288
NSA2	1.375	15.7971	4.65386	0.00122014	0.00882842	-0.900264
MUD2	1.53563	15.2154	4.65342	0.0012209	0.00882842	-0.900906
MRP1	1.62792	15.5801	4.6513	0.00122454	0.00882842	-0.904
RPL16A	1.29659	21.5628	4.63997	0.00124425	0.00893762	-0.920559
THO2	1.41082	18.0206	4.63508	0.00125285	0.00896657	-0.927706
DPB2	2.13474	17.5246	4.62808	0.00126529	0.0090192	-0.937955
RPS5	1.37179	21.4813	4.62309	0.00127422	0.0090192	-0.945252
MRPL22	3.07417	17.6392	4.61975	0.00128025	0.0090192	-0.950149
EFG1	1.46822	18.5255	4.6197	0.00128034	0.0090192	-0.95022
NAB3	2.24969	16.6614	4.61812	0.0012832	0.0090192	-0.952534
MYO3	1.3367	17.4563	4.611	0.00129619	0.00907793	-0.962977
ACC1	1.5585	19.8442	4.60123	0.00131422	0.00915932	-0.977309
SAS4	2.34253	14.0715	4.59966	0.00131715	0.00915932	-0.979616
FAP7	1.99863	16.3966	4.57603	0.00136199	0.00940927	-1.01433
SIP5	1.51272	15.6151	4.57567	0.00136269	0.00940927	-1.01487
RAD10	2.07597	14.8607	4.56598	0.00138156	0.00950612	-1.02913
LDB19	1.64357	14.5217	4.51242	0.00149106	0.0101614	-1.10821
GCD11	1.36679	19.2401	4.51182	0.00149234	0.0101614	-1.1091
PKP1	2.75103	14.9729	4.4878	0.0015445	0.0104801	-1.14471
MRP13	1.93012	16.8932	4.48383	0.0015533	0.0105035	-1.1506
SKI2	1.5877	16.9234	4.47988	0.00156212	0.0105103	-1.15647
FAR8	2.04875	14.7547	4.47858	0.00156502	0.0105103	-1.1584
MDM38	1.61461	14.6984	4.46336	0.00159957	0.0107056	-1.18102
NUP192	1.56286	16.2578	4.44984	0.00163091	0.0108309	-1.20114
IML1	2.24486	15.3112	4.44852	0.00163401	0.0108309	-1.2031
GBP2	1.4781	17.6697	4.44816	0.00163485	0.0108309	-1.20364
NCS2	1.72654	15.044	4.43452	0.00166724	0.0110083	-1.22397
HDA2	1.42263	16.5284	4.42276	0.00169574	0.0111589	-1.24153
NOP12	1.28831	19.0282	4.41789	0.00170767	0.0111707	-1.24879
ESF1	1.27204	18.6894	4.40832	0.00173142	0.0112801	-1.2631
RNT1	1.6803	16.9456	4.40001	0.00175232	0.0113785	-1.27553
RPL30	1.4847	19.5991	4.39523	0.00176445	0.0114194	-1.28268
CBF5	1.75625	19.628	4.38593	0.00178833	0.0115359	-1.29661
RPS16A	1.52104	20.9579	4.3784	0.00180792	0.011624	-1.30789
RRP45	2.28987	16.7814	4.37055	0.00182861	0.0116998	-1.31968
CEF1	1.96722	15.9185	4.36879	0.00183327	0.0116998	-1.32231
RPL22B	2.29045	17.33	4.36655	0.00183922	0.0116998	-1.32567
CDC36	1.70163	16.6457	4.36492	0.00184356	0.0116998	-1.32811
CBP1	1.7695	14.3736	4.35971	0.00185756	0.0117505	-1.33595
RFC2	1.40798	18.435	4.35644	0.00186638	0.0117684	-1.34085
ERG26	1.51904	17.2315	4.35241	0.00187734	0.0117995	-1.34691
VPS16	1.40492	16.6068	4.34158	0.00190709	0.0119483	-1.3632
SNU114	1.79934	16.0975	4.33772	0.00191782	0.0119772	-1.36901
MRPS16	2.17755	15.2076	4.33134	0.0019357	0.0120505	-1.37862
MRPS18	1.84261	15.1788	4.32087	0.0019654	0.0121967	-1.39438
PNO1	1.19557	16.8866	4.31722	0.00197586	0.0122019	-1.39988
TFG1	1.4553	14.9855	4.31515	0.00198183	0.0122019	-1.403
SIN4	1.86268	17.0892	4.31409	0.0019849	0.0122019	-1.40461
GIC2	1.29815	17.3234	4.30636	0.00200739	0.0123015	-1.41627
SDC1	2.13793	15.4363	4.30167	0.00202117	0.0123474	-1.42335
RRP8	1.26321	17.0868	4.2692	0.00211933	0.0129069	-1.47244
UBR1	1.28598	15.9354	4.26613	0.00212888	0.0129249	-1.47709
SKI6	1.83288	17.5578	4.25977	0.00214879	0.0130055	-1.48673
RRT14	1.53744	16.6873	4.25043	0.00217841	0.0130913	-1.5009
MDJ1	1.3657	18.3298	4.24834	0.0021851	0.0130913	-1.50407
NOP9	1.20326	18.5475	4.24622	0.00219192	0.0130913	-1.50729
RPB8	2.15826	18.1285	4.24334	0.00220118	0.0130913	-1.51165
PLP2	1.42722	17.2033	4.24324	0.00220151	0.0130913	-1.51181
CDC33	1.7681	20.0134	4.24277	0.00220302	0.0130913	-1.51252
APL2	1.72671	17.4251	4.23138	0.00224017	0.0132348	-1.52982
RPS3	1.23094	21.7323	4.23123	0.00224067	0.0132348	-1.53005
ARI1	1.80164	15.6517	4.22799	0.00225135	0.0132429	-1.53497
UTP8	1.21794	18.64	4.22672	0.00225555	0.0132429	-1.5369
TRS65	1.85621	15.7164	4.21725	0.00228718	0.0133753	-1.55131
RPS19A	1.35725	21.6943	4.21279	0.00230221	0.0133753	-1.55808
ENP2	1.29571	17.4534	4.21211	0.00230454	0.0133753	-1.55913
SMC4	1.31421	16.1538	4.21056	0.0023098	0.0133753	-1.56149
EAF3	1.96653	16.7036	4.20985	0.0023122	0.0133753	-1.56256
NMD5	1.36971	18.369	4.18024	0.00241535	0.0138713	-1.6077
ELP3	1.49333	17.7807	4.1802	0.00241548	0.0138713	-1.60776
BUD22	1.25269	18.2488	4.17917	0.00241916	0.0138713	-1.60933
SMC5	1.79517	15.505	4.17565	0.00243176	0.0139029	-1.6147
NOP13	1.36456	18.4677	4.16877	0.00245659	0.0139752	-1.62521
TCO89	1.36771	14.4551	4.1682	0.00245867	0.0139752	-1.62608
YLR419W	2.30587	18.2403	4.15788	0.00249647	0.0141089	-1.64186
RTC1	1.69427	15.2369	4.15785	0.00249657	0.0141089	-1.6419
RSM22	2.12277	14.3449	4.15089	0.00252244	0.0141733	-1.65256
RPB3	2.09149	17.145	4.14721	0.00253618	0.0142099	-1.65818
RPL23A	1.33464	22.3513	4.14431	0.00254713	0.0142237	-1.66263
NUT2	1.56702	16.2171	4.14271	0.00255316	0.0142237	-1.66507
DPB4	1.49209	17.0859	4.13899	0.00256728	0.0142619	-1.67077
RRP5	1.26379	19.9232	4.13103	0.00259772	0.0143902	-1.68296
RPC19	1.34318	19.5185	4.12745	0.00261155	0.0144261	-1.68845
PWP2	1.42183	17.6458	4.1004	0.00271863	0.0149754	-1.72997
SEA4	1.43756	17.3115	4.08747	0.00277144	0.0152235	-1.74985
RPO26	1.32881	17.5989	4.07678	0.00281596	0.0154248	-1.76631
ROK1	1.20003	16.6963	4.06857	0.00285061	0.0155542	-1.77895
PHB2	1.29771	16.182	4.06574	0.0028627	0.0155542	-1.78332
ATP5	1.67361	15.551	4.06558	0.00286336	0.0155542	-1.78356
PTC4	1.36498	15.7584	4.05646	0.00290262	0.0156987	-1.79762
MRS1	2.27249	15.3965	4.05569	0.00290597	0.0156987	-1.79881
ARD1	1.62503	15.5348	4.04224	0.00296494	0.0159732	-1.81956
GRE2	2.90622	16.4441	4.03747	0.00298619	0.0160436	-1.82693
MEX67	1.4079	16.7901	4.03441	0.00299988	0.0160731	-1.83166
RPL26A	1.17048	21.9661	4.02724	0.00303225	0.0162023	-1.84274
YDR391C	2.29835	17.3738	4.0226	0.00305343	0.0162532	-1.84992
KEL1	1.60402	16.4966	4.02152	0.00305836	0.0162532	-1.85159
DCP2	1.65421	18.4544	4.01198	0.00310242	0.0163508	-1.86635
OSH2	1.42016	15.4615	4.01068	0.00310847	0.0163508	-1.86836
VPS34	1.44066	15.1266	4.00965	0.00311327	0.0163508	-1.86996
RRP4	1.35	16.7371	4.00904	0.0031161	0.0163508	-1.8709
PSP1	1.40707	15.7495	4.00855	0.00311841	0.0163508	-1.87166
MKT1	1.27992	17.3312	3.9868	0.00322193	0.01675	-1.90536
ORC6	1.37052	15.1641	3.98468	0.00323221	0.01675	-1.90865
YIL001W	1.68531	14.9136	3.98344	0.00323826	0.01675	-1.91058
ERG1	1.13465	16.4279	3.98082	0.00325104	0.01675	-1.91464
TRA1	2.05046	17.6112	3.98016	0.00325426	0.01675	-1.91566
LSM2	1.93426	18.3636	3.96834	0.00331267	0.0170056	-1.93402
MRH4	1.11374	21.453	3.96033	0.00335284	0.0171669	-1.94645
BNI4	1.51726	17.5829	3.95075	0.00340161	0.0173712	-1.96135
KEX1	1.52836	16.154	3.9398	0.0034583	0.0176149	-1.97839
VPS35	1.21062	17.017	3.90965	0.00361953	0.0182693	-2.02538
MFT1	2.87539	16.7285	3.90929	0.0036215	0.0182693	-2.02594
IPI3	1.67773	16.6183	3.90883	0.00362404	0.0182693	-2.02666
LEO1	1.49769	16.2281	3.90434	0.00364875	0.0183097	-2.03367
ILV6	1.28691	18.0905	3.90398	0.00365073	0.0183097	-2.03422
HER2	1.89712	15.0965	3.89945	0.00367587	0.0183399	-2.0413
REX4	1.07477	15.8075	3.89713	0.00368883	0.0183399	-2.04493
TMA64	1.46491	17.5128	3.89666	0.00369148	0.0183399	-2.04567
RCL1	1.605	17.1994	3.89618	0.00369416	0.0183399	-2.04641
UBC1	1.30108	18.9909	3.89011	0.0037283	0.0184626	-2.0559
MSH2	1.30726	19.7935	3.87029	0.00384214	0.0189307	-2.08689
RPL14B	1.17632	15.7002	3.85383	0.00393947	0.019323	-2.11266
RPA12	1.20656	18.9763	3.8535	0.00394145	0.019323	-2.11317
SMC2	1.82359	16.1409	3.84329	0.00400315	0.0195416	-2.12917
SNF4	1.29174	17.5438	3.84283	0.00400599	0.0195416	-2.1299
SEC18	1.26618	20.5109	3.8318	0.00407389	0.0198236	-2.14721
RPL16B	1.14912	20.6193	3.82519	0.00411512	0.0199746	-2.15758
YLH47	1.32608	17.5666	3.81646	0.00417033	0.0201729	-2.1713
NPL3	1.19333	19.6688	3.81459	0.00418222	0.0201729	-2.17423
CAD1	2.24325	15.0424	3.81387	0.00418682	0.0201729	-2.17536
ACK1	1.13411	14.5046	3.80804	0.00422425	0.0203033	-2.18452
DBP8	1.10549	18.7309	3.80547	0.00424088	0.0203334	-2.18857
LYS20	1.45863	17.3475	3.79844	0.00428666	0.0205028	-2.19962
SYF1	1.86156	14.9613	3.79073	0.00433751	0.0206377	-2.21175
RPS22B	1.13968	19.968	3.79014	0.00434141	0.0206377	-2.21268
SNF12	1.98795	16.9229	3.78938	0.00434644	0.0206377	-2.21387
CUZ1	3.03186	16.1478	3.77878	0.00441759	0.0209249	-2.23057
MIA40	1.25409	14.4848	3.77457	0.00444614	0.0210093	-2.2372
RPL38	1.3622	21.186	3.76686	0.00449894	0.0211569	-2.24934
YOR131C	1.33032	18.059	3.76328	0.00452375	0.0212226	-2.255
DPS1	1.84365	19.5053	3.75736	0.00456495	0.0213648	-2.26432
IRA2	1.86404	14.7639	3.75506	0.00458109	0.0213893	-2.26795
RPL17A	1.47792	21.1041	3.75194	0.00460309	0.0214164	-2.27288
TIF35	1.16523	19.0733	3.75114	0.00460874	0.0214164	-2.27414
WHI4	2.43637	15.1843	3.74888	0.00462476	0.0214399	-2.27771
BMH1	1.24637	20.4488	3.74693	0.00463866	0.0214399	-2.2808
GID7	2.16049	15.8141	3.74581	0.0046466	0.0214399	-2.28256
SRP14	1.33868	17.7372	3.74212	0.00467305	0.0215114	-2.28839
DIP2	1.13174	17.9757	3.74006	0.00468782	0.0215288	-2.29164
MTG1	1.24637	17.0391	3.72685	0.00478402	0.0219193	-2.31252
UTP11	1.00719	17.2913	3.72173	0.00482183	0.022041	-2.32061
RPC82	1.22914	18.6179	3.71707	0.00485651	0.022148	-2.32798
MRD1	1.1202	17.8494	3.71311	0.00488617	0.0221836	-2.33423
RPL36B	1.15868	21.4353	3.70993	0.0049102	0.0221836	-2.33928
RUD3	1.05609	15.5443	3.70947	0.00491369	0.0221836	-2.34
TRS33	1.48623	16.0221	3.70913	0.00491624	0.0221836	-2.34054
SSF1	1.07802	16.8445	3.70852	0.00492088	0.0221836	-2.34151
CPS1	1.06262	18.9887	3.70534	0.00494503	0.022192	-2.34654
UBP3	1.08804	20.1812	3.70457	0.00495093	0.022192	-2.34776
MRT4	1.12232	18.5704	3.70381	0.00495671	0.022192	-2.34896
CUE3	1.53502	17.3573	3.70163	0.00497337	0.0221942	-2.35241
RPO41	1.46437	17.5773	3.69964	0.00498864	0.0221942	-2.35556
COY1	0.99821	20.7552	3.69932	0.00499114	0.0221942	-2.35607
TRM732	1.35035	15.1802	3.69269	0.0050424	0.0223714	-2.36657
SIS1	1.1888	20.3903	3.68529	0.00510027	0.022577	-2.37829
SSE2	1.23329	17.2364	3.68275	0.00512037	0.022615	-2.38233
EDC3	1.41771	18.4725	3.67817	0.00515667	0.0227241	-2.38959
YKL075C	1.12877	15.376	3.67283	0.00519941	0.0228198	-2.39806
CLF1	1.3897	14.7837	3.67211	0.00520516	0.0228198	-2.3992
BFR2	1.31176	17.4718	3.6711	0.00521329	0.0228198	-2.4008
UTP6	1.18765	17.5709	3.66485	0.00526386	0.0229898	-2.41071
USO1	1.18872	18.2297	3.66183	0.00528852	0.0230462	-2.41551
SWI4	1.30989	14.5499	3.65284	0.00536259	0.0233172	-2.42979
EIS1	1.11674	17.1542	3.64889	0.00539548	0.0234083	-2.43607
MAM3	1.32844	13.7187	3.645	0.00542805	0.0234976	-2.44224
HTS1	2.10756	17.6127	3.64068	0.00546449	0.0236032	-2.44911
PCF11	2.61249	16.1332	3.63872	0.00548111	0.023623	-2.45223
RTF1	1.09283	17.1723	3.63428	0.00551892	0.0237338	-2.45928
BMH2	1.31264	19.0305	3.63103	0.00554681	0.0237753	-2.46446
NUT1	1.33943	17.057	3.63033	0.00555283	0.0237753	-2.46557
CLU1	1.17492	19.4333	3.616	0.00567758	0.0242565	-2.48836
RIF1	1.21711	14.9043	3.6118	0.00571476	0.0243623	-2.49506
SIN3	1.93838	17.41	3.60976	0.0057329	0.0243866	-2.49831
VPS54	1.81087	14.1939	3.60303	0.00579309	0.0245893	-2.50902
NST1	2.23258	17.4497	3.60151	0.0058068	0.0245942	-2.51144
THP3	1.35198	14.5713	3.59496	0.0058662	0.0247923	-2.52188
BRR2	1.12754	17.099	3.5917	0.00589605	0.024861	-2.52708
CDC12	1.36125	17.799	3.5891	0.00591989	0.024861	-2.53122
STE50	1.14994	16.003	3.58768	0.00593304	0.024861	-2.53349
GYL1	1.31867	15.3664	3.58766	0.00593316	0.024861	-2.53351
PCL6	1.37358	15.7475	3.58627	0.00594605	0.0248618	-2.53574
YDR514C	2.35784	14.3722	3.58162	0.00598918	0.0249889	-2.54315
SUV3	1.66266	14.3261	3.5729	0.00607106	0.0252525	-2.55707
SRO7	1.30082	16.4554	3.57072	0.00609173	0.0252525	-2.56055
DBP6	1.06005	17.7602	3.56924	0.00610578	0.0252525	-2.56291
UTP9	1.15294	18.3919	3.569	0.00610809	0.0252525	-2.5633
CRT10	1.42709	15.0258	3.56809	0.00611674	0.0252525	-2.56475
CHO2	1.25624	15.2776	3.56528	0.00614358	0.02531	-2.56923
RXT3	2.53845	14.2695	3.56213	0.00617377	0.0253811	-2.57426
YGL082W	1.25938	15.4899	3.55336	0.00625881	0.0256768	-2.58827
NFS1	1.14824	18.4124	3.55116	0.00628034	0.0256847	-2.59179
RLI1	1.14968	16.9926	3.55049	0.00628692	0.0256847	-2.59286
RPC10	1.49947	18.7347	3.5438	0.0063528	0.0258999	-2.60354
MIS1	1.16299	18.7217	3.53781	0.00641249	0.0260678	-2.61312
RTR1	2.5284	14.0701	3.53701	0.00642057	0.0260678	-2.61441
RRS1	1.20687	17.8328	3.53522	0.0064385	0.0260866	-2.61727
SPT6	1.15411	17.9557	3.53321	0.00645879	0.0261148	-2.62049
DED1	1.14603	19.6146	3.52945	0.00649682	0.0262091	-2.6265
FPR1	1.13587	21.5558	3.52702	0.00652149	0.0262091	-2.63038
SUI3	1.05504	19.8308	3.52695	0.0065222	0.0262091	-2.63049
IKI3	1.03942	17.584	3.52352	0.00655729	0.0262962	-2.63599
GAR1	1.1874	19.5403	3.5216	0.00657701	0.0263024	-2.63906
APL3	1.15061	16.9291	3.52076	0.00658565	0.0263024	-2.6404
REF2	1.49543	15.8594	3.51922	0.0066015	0.0263121	-2.64286
PBS2	1.14338	16.726	3.51606	0.00663427	0.026389	-2.64793
RPA135	1.12311	19.96	3.50746	0.00672411	0.0266923	-2.6617
CSL4	1.35683	16.7953	3.50144	0.00678777	0.0268905	-2.67134
PBY1	1.19168	16.7265	3.4989	0.00681483	0.0269433	-2.67541
LTV1	1.93546	15.7371	3.49618	0.00684388	0.0270037	-2.67977
SYP1	1.18113	17.5218	3.4882	0.00693004	0.0272304	-2.69257
HFA1	2.54387	14.168	3.48701	0.006943	0.0272304	-2.69448
ETR1	1.11567	16.4307	3.4849	0.00696597	0.0272542	-2.69786
NOC2	1.04813	19.6924	3.48208	0.00699679	0.0272542	-2.70237
RPL31B	1.97166	16.5626	3.48087	0.00701015	0.0272542	-2.70432
DOA1	1.16252	15.4032	3.48044	0.00701489	0.0272542	-2.70501
PFK2	1.00718	20.0535	3.47891	0.00703169	0.0272542	-2.70746
PKC1	1.03992	15.6235	3.47784	0.00704348	0.0272542	-2.70917
YCR016W	1.03958	17.4449	3.47758	0.00704635	0.0272542	-2.70959
HCA4	1.03683	18.5132	3.47218	0.00710636	0.0273783	-2.71826
TAF6	1.56912	18.0936	3.46274	0.00721247	0.0277297	-2.73342
IBD2	1.11129	16.1567	3.46156	0.00722584	0.0277297	-2.73531
FOB1	1.38985	14.6391	3.45955	0.00724865	0.0277629	-2.73853
TCB3	1.10366	16.4875	3.45539	0.00729615	0.0278903	-2.74521
ATP11	1.40044	16.9857	3.45316	0.00732176	0.0279338	-2.74879
MRPS17	2.17273	14.5911	3.4456	0.00740932	0.028213	-2.76094
MTF2	1.84005	15.9618	3.44126	0.00746004	0.028325	-2.76791
PFK1	1.04446	19.501	3.44061	0.00746763	0.028325	-2.76895
MRPS5	2.84363	14.8578	3.4385	0.00749251	0.0283645	-2.77235
CMK2	1.03562	16.61	3.43668	0.00751398	0.0283753	-2.77528
LMO1	1.60038	15.5326	3.43581	0.0075243	0.0283753	-2.77668
RAD52	1.2743	16.7591	3.43276	0.00756054	0.028404	-2.78159
RRP7	1.52035	16.5258	3.43155	0.00757489	0.028404	-2.78352
RPL25	0.998855	22.0441	3.43008	0.00759241	0.028404	-2.78588
BUL2	1.12184	15.733	3.42836	0.00761308	0.028404	-2.78866
ETP1	1.48354	14.1561	3.42788	0.00761883	0.028404	-2.78943
DHH1	1.44167	18.9213	3.42262	0.00768211	0.0285856	-2.79788
DCP1	1.25183	18.0934	3.42007	0.0077131	0.0286466	-2.80199
RPS18A	1.08044	21.7236	3.41813	0.00773661	0.0286796	-2.8051
GCN3	1.16604	19.143	3.41612	0.00776116	0.0287031	-2.80834
EFR3	1.22085	15.7269	3.41497	0.00777522	0.0287031	-2.81019
SAC6	1.05443	19.9501	3.41402	0.00778687	0.0287031	-2.81171
RPS2	0.99067	21.4281	3.40844	0.00785571	0.0289025	-2.8207
NOC3	1.10392	16.633	3.40327	0.00792002	0.0290846	-2.82903
SCP160	1.27725	19.897	3.39885	0.00797539	0.0292331	-2.83614
RPA190	1.19109	19.6855	3.39243	0.0080566	0.0294757	-2.84648
RRP9	0.984153	17.3345	3.38941	0.0080951	0.0295614	-2.85134
RPP0	1.09488	22.3936	3.38796	0.00811364	0.0295741	-2.85368
NOP58	0.909441	20.8321	3.38561	0.00814382	0.0295993	-2.85747
RPS28A	1.02989	20.3926	3.38507	0.00815075	0.0295993	-2.85834
DUF1	1.45638	15.8116	3.37597	0.00826877	0.0299281	-2.873
RPL11B	1.05255	22.1908	3.37574	0.00827181	0.0299281	-2.87338
RPS1A	1.15894	21.007	3.36944	0.00835462	0.0301403	-2.88354
NOP6	1.12389	18.2846	3.36894	0.00836121	0.0301403	-2.88434
GSC2	1.43525	19.1896	3.35962	0.00848527	0.0304835	-2.89937
RPL10	1.25538	18.5609	3.35918	0.00849126	0.0304835	-2.90009
CCR4	1.25948	18.6484	3.3583	0.00850305	0.0304835	-2.9015
PKP2	2.16638	14.7654	3.35168	0.00859253	0.0307481	-2.91217
RTT107	1.19505	15.4632	3.3494	0.00862361	0.0308031	-2.91586
GDE1	1.32714	18.5308	3.34375	0.00870109	0.0310195	-2.92497
NMD2	1.3851	14.7942	3.34237	0.00872023	0.0310195	-2.92721
EGD2	0.9652	19.3754	3.34154	0.00873166	0.0310195	-2.92855
RNA14	1.43048	16.529	3.33972	0.00875688	0.0310529	-2.93149
RTT102	1.40302	16.5756	3.33565	0.00881355	0.0311974	-2.93806
RPS14B	1.01407	21.9326	3.33301	0.00885041	0.0312341	-2.94231
SGF29	1.33247	14.4787	3.33263	0.00885578	0.0312341	-2.94293
MED4	1.71411	15.9608	3.31657	0.00908423	0.0319824	-2.96888
RPS17B	1.11149	20.8719	3.31499	0.00910701	0.0320051	-2.97143
POP5	1.34742	15.6151	3.30348	0.00927482	0.0325365	-2.99003
SLT2	1.22845	17.8113	3.29553	0.00939269	0.0328912	-3.00288
GIN4	1.61154	18.9436	3.28951	0.00948307	0.0331485	-3.01263
CIN2	1.65523	14.5757	3.28446	0.00955946	0.033356	-3.0208
UTP21	1.53153	17.4658	3.28319	0.00957874	0.0333639	-3.02285
RPS7B	1.12323	21.126	3.27973	0.00963154	0.0334292	-3.02844
RPL9A	0.968769	20.937	3.27973	0.00963156	0.0334292	-3.02844
UFD4	1.18254	18.374	3.27833	0.00965301	0.0334444	-3.03071
BUD21	1.03258	17.8776	3.25111	0.0100805	0.0348638	-3.07477
SHS1	0.929151	17.5031	3.24541	0.0101725	0.03509	-3.08402
RRP43	1.29699	16.4917	3.24484	0.0101817	0.03509	-3.08493
MPE1	1.35765	13.7183	3.24155	0.0102353	0.035213	-3.09027
CKB2	0.981907	17.5071	3.2386	0.0102836	0.0353171	-3.09505
VPS5	1.38127	17.1421	3.22772	0.0104636	0.0358725	-3.11269
SMY1	1.07036	16.8385	3.21942	0.010603	0.036231	-3.12613
RCN2	0.996056	17.7647	3.2193	0.0106051	0.036231	-3.12633
NOP14	1.82675	16.7794	3.2155	0.0106695	0.0363877	-3.13248
VAM6	1.10396	15.0092	3.20711	0.0108136	0.036815	-3.1461
RPL6A	0.893635	21.3663	3.20123	0.0109157	0.0370981	-3.15564
ARF2	1.26805	17.89	3.19964	0.0109433	0.0371278	-3.15821
TCB1	1.28194	14.938	3.19716	0.0109869	0.0371476	-3.16224
GIR2	1.17654	18.7228	3.1971	0.0109879	0.0371476	-3.16234
LIP5	1.47288	15.6305	3.19607	0.011006	0.0371476	-3.16401
RGA1	1.04346	15.6062	3.19348	0.0110516	0.0372373	-3.1682
TY1B-DR3	1.34489	14.6492	3.18419	0.0112171	0.0377302	-3.18329
SAP190	1.07056	15.3535	3.17118	0.0114531	0.0383929	-3.20441
STE4	1.34218	15.2633	3.17097	0.011457	0.0383929	-3.20475
TYW1	0.894159	15.0846	3.1701	0.0114729	0.0383929	-3.20616
RPS4A	1.10754	21.4903	3.16306	0.0116028	0.0387617	-3.21758
RPC37	1.13424	16.9794	3.1603	0.0116543	0.0388673	-3.22206
RIM20	0.990064	17.0366	3.15586	0.0117374	0.0389811	-3.22927
PPN1	1.53635	15.8378	3.1557	0.0117405	0.0389811	-3.22954
JSN1	1.31137	16.6424	3.1553	0.011748	0.0389811	-3.23019
TFB2	1.73139	16.6154	3.15039	0.0118409	0.039223	-3.23817
MAK5	1.05451	18.008	3.14263	0.011989	0.0396467	-3.25077
RPL31A	1.2458	20.5809	3.13375	0.012161	0.0401476	-3.26519
INP52	1.00559	15.4068	3.12975	0.0122394	0.0403386	-3.2717
STT4	1.02284	16.4817	3.12689	0.0122956	0.0404557	-3.27634
NCL1	1.94366	16.3415	3.12477	0.0123375	0.0405258	-3.27979
MIR1	2.22022	15.2519	3.11705	0.0124914	0.0409422	-3.29234
RTT106	1.11187	15.8514	3.11632	0.0125061	0.0409422	-3.29353
RPS24A	1.15812	20.355	3.11362	0.0125604	0.0410092	-3.29792
DBP10	1.00968	15.3595	3.10304	0.0127757	0.0416166	-3.31512
PRB1	1.26397	17.6109	3.10089	0.0128199	0.0416913	-3.31862
FIP1	1.15715	17.1908	3.09876	0.0128639	0.0417649	-3.32208
RPL13B	1.01414	21.2077	3.09412	0.0129601	0.0419693	-3.32962
RPL35A	0.910019	21.7861	3.09367	0.0129696	0.0419693	-3.33036
SOF1	0.88592	16.847	3.08973	0.013052	0.0421428	-3.33676
ROX3	1.42426	15.8118	3.08905	0.0130662	0.0421428	-3.33787
YLR287C	1.41104	16.4287	3.08618	0.0131267	0.0422684	-3.34254
ETT1	1.35978	18.4356	3.0842	0.0131685	0.042328	-3.34575
RPL19A	0.970024	21.7844	3.08327	0.0131884	0.042328	-3.34728
SNF2	2.20114	17.6428	3.07735	0.0133145	0.0425933	-3.3569
RPL37A	2.31857	19.7808	3.07166	0.0134369	0.0429149	-3.36615
FSH3	1.17163	16.9928	3.07007	0.0134714	0.0429552	-3.36874
HCH1	1.07333	20.4551	3.06737	0.0135302	0.0430428	-3.37314
PRE1	1.11749	17.2586	3.06614	0.0135569	0.0430428	-3.37513
FDO1	1.08114	14.2079	3.06578	0.0135647	0.0430428	-3.37572
PWP1	2.57254	19.8895	3.06147	0.0136593	0.0432719	-3.38274
SMC6	1.16253	15.3781	3.05918	0.0137097	0.0432719	-3.38646
RPL8A	0.904167	22.1609	3.05869	0.0137206	0.0432719	-3.38727
RMD8	1.1685	14.0276	3.05848	0.0137252	0.0432719	-3.3876
SRP1	1.0628	19.4964	3.05338	0.0138384	0.0435589	-3.3959
KIN2	1.28598	15.3385	3.04308	0.0140699	0.0441816	-3.41266
YKL071W	1.136	17.1048	3.04252	0.0140827	0.0441816	-3.41357
ERG6	1.18083	15.9032	3.04159	0.0141039	0.0441816	-3.41509
SWC4	1.50948	16.0086	3.03813	0.0141827	0.0443381	-3.42072
RSR1	1.07799	15.6878	3.03742	0.014199	0.0443381	-3.42188
SFB2	0.945647	16.061	3.02636	0.0144544	0.0450601	-3.43987
KRI1	1.07204	19.4281	3.02543	0.0144762	0.0450601	-3.44139
LYS9	2.01703	15.0848	3.0218	0.0145612	0.0452084	-3.4473
YLL032C	1.62254	16.7196	3.02143	0.01457	0.0452084	-3.44791
IMD4	1.18216	19.3941	3.01365	0.014754	0.0457071	-3.46057
RTG2	1.28644	16.2168	3.0109	0.0148196	0.0458061	-3.46504
ARF1	0.980052	20.722	3.01036	0.0148327	0.0458061	-3.46593
RPS15	1.02897	21.0599	3.0092	0.0148605	0.0458198	-3.46782
RPA49	1.07265	19.4085	3.00752	0.0149008	0.0458719	-3.47055
MED1	1.06664	16.7471	3.00555	0.0149482	0.0459458	-3.47376
RPC11	1.03456	16.4589	3.0024	0.0150243	0.0461076	-3.47888
HSV2	1.15608	14.3445	2.99676	0.0151621	0.0464575	-3.48808
RIX1	1.23499	18.1723	2.99554	0.0151919	0.0464764	-3.49006
PDS5	1.07761	16.8331	2.9933	0.0152469	0.0465719	-3.4937
YRB2	1.00382	16.7247	2.99047	0.0153169	0.0467129	-3.49832
GRX3	1.06076	17.1052	2.98799	0.0153784	0.0468163	-3.50236
DBP5	1.30666	18.7565	2.98676	0.015409	0.0468163	-3.50436
RPN8	1.07501	18.8498	2.98622	0.0154224	0.0468163	-3.50523
MDY2	0.957392	17.4602	2.97506	0.0157033	0.0475953	-3.52341
SHE2	1.54868	17.1538	2.96695	0.0159106	0.0481491	-3.53662
LYS1	1.37582	16.8846	2.96464	0.01597	0.0482546	-3.54037
SHM1	1.14772	17.1625	2.9573	0.0161608	0.0487559	-3.55233
PTC3	1.22642	16.1566	2.95457	0.0162324	0.0488966	-3.55677
SMI1	0.99371	16.268	2.9529	0.0162764	0.048954	-3.5595
SMD2	2.50556	15.495	2.9515	0.0163132	0.0489894	-3.56177
TYW3	1.15459	15.1904	2.95005	0.0163515	0.0490295	-3.56413
HSC82	0.887492	21.8804	2.94325	0.0165328	0.0494973	-3.57522
PPZ1	0.859951	15.4421	2.94199	0.0165663	0.0495223	-3.57726
HEL2	1.59103	15.4698	2.92614	0.0169973	0.0506941	-3.60309
GCS1	1.01159	16.2753	2.92546	0.0170161	0.0506941	-3.6042
SKI3	1.03473	18.2415	2.92474	0.0170359	0.0506941	-3.60536
CPR6	0.842235	17.1203	2.91882	0.0172002	0.0510306	-3.61501
TIP41	1.17075	15.4944	2.91783	0.0172279	0.0510306	-3.61662
RPL12A	0.888585	22.1436	2.91692	0.0172531	0.0510306	-3.61809
MSS18	1.65413	14.1378	2.91295	0.0173646	0.0512518	-3.62457
MUK1	1.40678	16.6232	2.91155	0.0174039	0.0512518	-3.62684
RPL7A	1.051	22.4216	2.91147	0.0174063	0.0512518	-3.62698
RPS11A	0.931954	20.8207	2.90496	0.0175909	0.0517177	-3.63757
TYS1	2.01544	16.1847	2.9014	0.0176927	0.0519393	-3.64337
WTM1	1.01359	17.1526	2.89655	0.0178326	0.0522679	-3.65127
TRI1	1.02171	15.4538	2.89567	0.017858	0.0522679	-3.6527
TAF14	0.97029	18.3398	2.8917	0.0179734	0.0524492	-3.65917
RPS8A	1.08692	20.6307	2.89006	0.0180215	0.0525114	-3.66185
HSM3	0.983442	15.4621	2.88883	0.0180574	0.0525381	-3.66385
CFT1	1.69483	16.2768	2.88487	0.0181739	0.0527985	-3.6703
RFC1	1.76346	17.059	2.87522	0.0184609	0.0534738	-3.68602
MPM1	1.65293	17.4186	2.87059	0.0186001	0.0537977	-3.69355
MNN5	0.843664	15.7753	2.86074	0.0189002	0.054585	-3.7096
NOC4	0.906732	17.4254	2.85945	0.0189398	0.054619	-3.7117
GAL11	1.10197	16.7898	2.85782	0.0189899	0.0546831	-3.71434
TOM1	0.992125	15.0427	2.85642	0.0190331	0.0547271	-3.71662
NIP1	0.904121	19.0814	2.85133	0.0191914	0.0550035	-3.72492
UTP20	1.49581	17.7233	2.85082	0.0192071	0.0550035	-3.72574
ARC19	1.18625	16.2336	2.85062	0.0192134	0.0550035	-3.72607
CIT1	1.46725	16.4814	2.84296	0.0194541	0.0554956	-3.73854
TIF34	0.999777	19.7885	2.84275	0.0194606	0.0554956	-3.73888
STE11	0.913167	16.066	2.84245	0.0194702	0.0554956	-3.73937
CKB1	0.935621	17.4888	2.84049	0.0195324	0.0555922	-3.74256
DRE2	1.12283	14.8968	2.83175	0.0198117	0.0562051	-3.75678
VMA5	0.946625	19.5595	2.83169	0.0198136	0.0562051	-3.75688
PTI1	0.816485	17.4271	2.83107	0.0198337	0.0562051	-3.75789
MHP1	0.882172	15.0464	2.82329	0.0200864	0.0567572	-3.77056
RPS12	0.908035	21.9986	2.82181	0.0201346	0.0568115	-3.77296
RMR1	1.439	14.214	2.81895	0.0202285	0.0569943	-3.77761
PET9	1.09759	18.4552	2.81753	0.0202753	0.0570443	-3.77992
RET1	0.919959	19.5162	2.81488	0.020363	0.0571334	-3.78424
NOP1	0.876172	21.9707	2.81403	0.0203912	0.0571334	-3.78562
CBP3	0.897487	15.9164	2.81393	0.0203944	0.0571334	-3.78578
RBG2	1.01919	18.7359	2.81051	0.0205082	0.0573702	-3.79135
NOP10	0.968484	20.3511	2.80237	0.0207817	0.0579597	-3.80459
PFK26	1.49525	14.5515	2.80187	0.0207987	0.0579597	-3.80541
YTM1	0.81644	18.0917	2.80161	0.0208076	0.0579597	-3.80584
RPT4	1.00715	18.4423	2.79526	0.0210237	0.0584425	-3.81616
ACO2	1.12961	15.8549	2.79477	0.0210405	0.0584425	-3.81696
RSM23	1.00802	17.0312	2.79221	0.0211282	0.0586032	-3.82112
ENP1	0.993349	17.8364	2.78542	0.0213632	0.0591582	-3.83217
POR1	1.14051	18.2113	2.78469	0.0213887	0.0591582	-3.83336
DCC1	1.24713	15.5023	2.78339	0.0214341	0.0591724	-3.83548
MEU1	1.1145	20.0633	2.78281	0.0214541	0.0591724	-3.83641
MNN10	2.2868	15.268	2.77764	0.0216358	0.0595896	-3.84483
APN1	1.07872	14.1141	2.77203	0.0218344	0.0600523	-3.85395
PSP2	0.931701	15.5937	2.76484	0.0220917	0.0606749	-3.86565
BCH2	1.55613	15.7713	2.76289	0.0221617	0.0607371	-3.8688
SDS3	1.31113	13.0551	2.76106	0.0222282	0.0607942	-3.87179
NOG1	0.840407	18.309	2.75412	0.022481	0.0613235	-3.88307
SNX3	0.921205	16.6914	2.75403	0.0224842	0.0613235	-3.88321
HTA2	0.898665	21.4354	2.73825	0.0230702	0.0628342	-3.90886
RPS23A	1.33677	19.458	2.7358	0.0231623	0.0629975	-3.91283
RPL4A	0.928111	20.8488	2.7282	0.0234514	0.0636955	-3.92519
RRP6	0.829136	19.3133	2.72305	0.0236492	0.0640567	-3.93355
PMR1	2.41219	15.2857	2.72275	0.0236606	0.0640567	-3.93403
RFC4	1.35651	17.5279	2.72219	0.0236824	0.0640567	-3.93495
REP1	0.97328	17.8619	2.71759	0.0238607	0.0643614	-3.94242
CBS2	1.22622	17.5931	2.71452	0.0239804	0.0645956	-3.9474
RPL33B	0.870197	18.4398	2.70821	0.0242286	0.0650414	-3.95765
AYR1	1.39248	15.082	2.70796	0.0242384	0.0650414	-3.95805
FAL1	1.16844	16.2476	2.70646	0.0242977	0.0650926	-3.96048
CSN3	2.66989	14.4264	2.70476	0.0243655	0.0651852	-3.96325
RPC25	1.02996	17.2301	2.6962	0.024708	0.0659216	-3.97713
UBR2	0.945572	14.6629	2.69259	0.0248541	0.0662214	-3.983
APL6	0.827223	18.3624	2.69064	0.0249334	0.0663424	-3.98616
SCJ1	1.03088	17.1862	2.68932	0.0249873	0.0663958	-3.98831
SHE3	0.775908	15.7192	2.68825	0.0250308	0.0664159	-3.99004
UPF3	1.02888	16.8013	2.68747	0.0250626	0.0664159	-3.9913
MLH1	0.939729	16.0295	2.6837	0.0252174	0.0667194	-3.99742
LSG1	0.74346	15.1896	2.68303	0.0252452	0.0667194	-3.99851
ESL1	1.1749	13.9466	2.67929	0.0253995	0.067037	-4.00457
SEC13	1.0538	18.5628	2.67262	0.0256777	0.0676802	-4.01539
RSP5	0.81782	17.543	2.67072	0.0257574	0.0677991	-4.01847
YPL225W	1.09345	17.022	2.66441	0.0260245	0.0684103	-4.02871
RPF2	0.989028	17.2707	2.66307	0.0260815	0.0684683	-4.03088
CFT2	1.73094	18.3762	2.66101	0.0261692	0.0684683	-4.03421
GEA2	0.965102	16.4433	2.65955	0.0262319	0.0684683	-4.03659
IMD3	1.96497	17.1181	2.65922	0.0262459	0.0684683	-4.03711
RPL21A	0.816128	21.2125	2.65898	0.0262561	0.0684683	-4.0375
NSA1	0.874283	16.6233	2.65079	0.0266095	0.0692059	-4.05077
RPS25A	1.27102	20.9566	2.64873	0.0266992	0.0692877	-4.05411
ACE2	1.33576	15.0748	2.64845	0.0267116	0.0692877	-4.05457
PAP1	0.986078	17.5689	2.64632	0.0268046	0.0694371	-4.05801
MSH6	0.886766	17.8311	2.64529	0.0268498	0.0694625	-4.05968
SAS10	0.964935	17.5848	2.63982	0.0270907	0.0699932	-4.06854
EBP2	0.869739	18.9727	2.63516	0.027298	0.0704359	-4.07609
DIS3	0.757714	17.947	2.63256	0.0274142	0.0705503	-4.08031
DIM1	0.874031	17.6148	2.63256	0.0274143	0.0705503	-4.08031
PUP1	0.827172	17.4433	2.63054	0.0275047	0.0706902	-4.08357
LRG1	1.02724	14.5877	2.62776	0.0276301	0.0709143	-4.08808
RPC34	1.67276	15.0826	2.627	0.0276642	0.0709143	-4.0893
YGL117W	1.21698	15.7691	2.61977	0.0279932	0.0715705	-4.10101
CAF20	1.16432	16.6396	2.61695	0.0281224	0.0718073	-4.10557
GOS1	1.81987	15.4394	2.608	0.0285369	0.072771	-4.12005
CMP2	0.951505	18.2173	2.60535	0.0286608	0.0729919	-4.12433
UTP7	0.890981	16.9998	2.60289	0.028776	0.0731903	-4.1283
SEC7	0.972731	17.4605	2.60116	0.0288576	0.0733028	-4.1311
VPS27	0.770592	18.115	2.59613	0.0290959	0.0737439	-4.13924
ELG1	0.865915	14.0233	2.59591	0.0291064	0.0737439	-4.1396
SKG3	0.76004	14.9286	2.59497	0.0291512	0.0737621	-4.14112
PIL1	0.876826	19.6918	2.59377	0.0292084	0.0738115	-4.14305
PHO23	1.34199	16.9317	2.58463	0.0296478	0.0748255	-4.15781
PUF6	0.784298	18.6922	2.57945	0.0299	0.075361	-4.16618
PAA1	0.965174	19.1767	2.5787	0.0299369	0.075361	-4.1674
TY1B-GR1	0.875199	18.2453	2.57642	0.0300488	0.0755458	-4.17108
ACL4	1.12945	17.357	2.56719	0.0305058	0.0765964	-4.18599
CMS1	0.842674	18.0603	2.56392	0.0306693	0.0769086	-4.19126
POL5	1.59155	18.8374	2.55776	0.0309796	0.0775702	-4.2012
UTP15	0.900139	18.0758	2.55712	0.0310123	0.0775702	-4.20224
RCN1	1.1993	14.7435	2.55581	0.0310787	0.0775833	-4.20435
KRT33A	1.62893	13.3425	2.55545	0.0310966	0.0775833	-4.20492
COP1	0.787954	19.014	2.55321	0.031211	0.07768	-4.20854
YIP3	0.845298	16.9662	2.55314	0.0312146	0.07768	-4.20865
MNN1	0.968919	15.1671	2.55113	0.0313173	0.0778238	-4.21189
AEP3	1.96223	14.1996	2.55046	0.0313518	0.0778238	-4.21298
NIP7	0.852521	18.6964	2.54923	0.0314147	0.0778814	-4.21495
RPS26B	0.957882	20.4612	2.54642	0.0315597	0.0780969	-4.21949
PRP43	1.10816	19.7895	2.546	0.0315813	0.0780969	-4.22017
DBP7	1.16852	16.0334	2.54472	0.0316471	0.0781611	-4.22222
MET7	0.769526	16.5101	2.54341	0.031715	0.0782231	-4.22433
HOC1	0.811098	17.3563	2.5427	0.031752	0.0782231	-4.22548
PAC10	1.07041	15.7252	2.53711	0.0320437	0.0788211	-4.23449
BEM4	1.12707	15.9461	2.53651	0.0320751	0.0788211	-4.23546
YAF9	1.2019	15.4965	2.52253	0.032817	0.0805434	-4.25798
SWD2	1.71163	14.8565	2.52149	0.032873	0.0805798	-4.25966
GLT1	0.796571	19.5426	2.52032	0.0329358	0.0806331	-4.26154
PEX3	1.40449	14.9441	2.50362	0.0338474	0.0826584	-4.28839
UTP5	0.773737	17.9769	2.50246	0.033912	0.0827131	-4.29027
UTP30	0.854678	18.3472	2.49428	0.0343685	0.0837226	-4.30341
RPB5	0.920981	18.4006	2.49155	0.0345222	0.0839351	-4.30779
NUP85	1.00907	15.2998	2.49121	0.0345414	0.0839351	-4.30834
AHA1	0.739365	20.7052	2.48371	0.034968	0.0847733	-4.3204
SDS24	0.885283	18.4756	2.48362	0.0349728	0.0847733	-4.32053
CAP2	0.93112	17.4768	2.47281	0.0355966	0.0861789	-4.33788
SKI7	0.843477	15.0261	2.47178	0.0356571	0.0861877	-4.33955
PEP3	0.908127	17.3105	2.471	0.0357024	0.0861877	-4.3408
PRP8	1.47218	16.5641	2.46975	0.0357753	0.0861877	-4.3428
DET1	0.795963	17.6048	2.46952	0.0357888	0.0861877	-4.34317
HXK1	1.95531	17.1748	2.46899	0.03582	0.0861877	-4.34402
TAF4	1.07823	15.935	2.4655	0.0360248	0.0865744	-4.34962
YNL193W	0.984652	13.9231	2.46242	0.0362066	0.0869047	-4.35455
SDH1	0.86754	17.0829	2.45941	0.0363857	0.0872278	-4.35939
SYC1	0.814144	15.5085	2.45422	0.0366957	0.0878635	-4.3677
TCB2	3.47211	15.6561	2.45267	0.0367888	0.087979	-4.37019
UTR1	1.00858	16.8508	2.45103	0.0368876	0.0881039	-4.37281
RPS31	0.916798	21.5878	2.45031	0.0369309	0.0881039	-4.37396
SET2	1.06016	15.1137	2.44638	0.0371689	0.088564	-4.38026
TGL1	0.839234	14.2591	2.44504	0.0372509	0.0886516	-4.38241
PRP22	1.43052	15.4934	2.44239	0.0374121	0.0889275	-4.38664
SEC26	0.815561	19.2382	2.44144	0.0374707	0.088959	-4.38818
RPS13	0.942956	21.3865	2.43753	0.0377111	0.0894213	-4.39444
UTP18	0.947763	17.785	2.43539	0.0378432	0.0896263	-4.39786
DST1	1.11962	18.253	2.43289	0.0379979	0.0898623	-4.40185
CAT8	1.46452	13.9768	2.4323	0.0380345	0.0898623	-4.40279
GGA1	1.24811	16.8	2.43095	0.0381188	0.089953	-4.40496
IKI1	1.29312	17.0385	2.42846	0.0382744	0.0902116	-4.40894
ARB1	0.914093	20.5765	2.42701	0.0383649	0.090235	-4.41126
KAP122	0.825945	16.0654	2.42683	0.0383763	0.090235	-4.41155
MAD1	0.910098	15.9764	2.42556	0.0384564	0.090315	-4.41359
NUG1	0.725584	18.6287	2.42337	0.038594	0.0905298	-4.41708
SMC1	1.00363	18.4704	2.41978	0.0388212	0.0908924	-4.42282
DOM34	0.855728	17.8245	2.41947	0.0388413	0.0908924	-4.42332
YGR130C	0.748031	16.4027	2.41715	0.0389886	0.0909908	-4.42702
RPS9B	0.764325	20.6855	2.41682	0.0390096	0.0909908	-4.42755
PGC1	1.4708	14.9336	2.41662	0.0390226	0.0909908	-4.42787
BNI1	1.34229	17.2315	2.41348	0.0392235	0.0913507	-4.43289
RPA43	0.943653	19.0437	2.41189	0.0393253	0.0914792	-4.43543
ATG20	0.880424	15.9537	2.41098	0.0393836	0.0915062	-4.43687
RPC40	0.821783	20.3069	2.40943	0.0394836	0.09163	-4.43935
SRP40	0.808138	19.8453	2.40835	0.0395534	0.0916835	-4.44108
SUI2	0.966051	19.6226	2.39706	0.0402901	0.0932809	-4.4591
PRT1	0.695244	20.0121	2.38759	0.0409188	0.0945132	-4.4742
MIC60	1.15807	14.159	2.38076	0.0413778	0.0954156	-4.48508
CRM1	0.777654	18.8824	2.38033	0.0414068	0.0954156	-4.48576
DBP3	0.739018	21.199	2.37842	0.0415368	0.0956029	-4.48882
RAD27	1.04784	16.9938	2.37412	0.0418295	0.0961636	-4.49566
RPA34	0.918082	19.577	2.37186	0.0419841	0.0962997	-4.49926
ARP4	1.27985	16.042	2.37163	0.042	0.0962997	-4.49963
MNN9	0.731427	17.6198	2.36447	0.0424938	0.097235	-4.51101
MYO2	0.854745	18.7542	2.3593	0.0428548	0.0979467	-4.51925
TRS120	1.95353	17.3798	2.3524	0.0433401	0.0988254	-4.5302
HLJ1	1.7871	13.7953	2.34949	0.0435465	0.0990483	-4.53482
NOB1	1.56132	14.9979	2.34889	0.0435893	0.0990483	-4.53578
SDS23	0.924954	17.7583	2.34665	0.0437495	0.0991729	-4.53935
ACF4	1.07507	15.2744	2.34605	0.0437923	0.0991729	-4.5403
NAT1	0.772349	17.7853	2.34593	0.0438006	0.0991729	-4.54048
MYO4	1.22136	17.9997	2.34529	0.0438465	0.0991729	-4.5415
CYM1	1.5142	14.2065	2.34092	0.0441603	0.0997676	-4.54843
BCP1	1.89073	16.3095	2.33547	0.0445553	0.100544	-4.55708
CCT7	0.952898	18.9407	2.32828	0.0450815	0.101615	-4.56849
YSH1	1.18036	16.5217	2.32708	0.0451699	0.101682	-4.57039
SNU13	0.738056	22.0834	2.32122	0.0456038	0.102321	-4.57967
YGR266W	0.680099	15.6102	2.31429	0.0461227	0.10329	-4.59065
VPS28	0.890436	15.4859	2.31405	0.0461408	0.10329	-4.59103
GYP7	0.790608	17.1898	2.30819	0.0465839	0.103826	-4.6003
VPS15	1.01386	14.0891	2.30795	0.0466026	0.103826	-4.60069
CIC1	0.668981	18.1227	2.30735	0.0466476	0.103826	-4.60162
RPL28	0.824087	20.577	2.30718	0.0466607	0.103826	-4.60189
HAS1	0.857018	18.0295	2.30715	0.0466633	0.103826	-4.60195
ALY2	0.767555	17.4348	2.3067	0.0466977	0.103826	-4.60266
ARC1	1.01034	18.2362	2.30346	0.046945	0.104189	-4.60778
ARO9	0.913306	16.8451	2.30317	0.0469676	0.104189	-4.60825
HOG1	0.818357	18.4767	2.2979	0.0473725	0.104969	-4.61656
SFM1	0.982646	15.8026	2.29674	0.0474624	0.105049	-4.6184
YTA6	0.905055	14.2607	2.29243	0.0477976	0.105672	-4.62521
APL1	0.723071	16.9271	2.29023	0.0479688	0.105931	-4.62868
SHE4	1.3008	16.1442	2.28653	0.0482595	0.106453	-4.63452
SSN2	0.864344	13.9197	2.28431	0.0484344	0.10664	-4.63802
CDC34	1.20503	18.6516	2.28408	0.0484528	0.10664	-4.63839
WBP1	0.737767	15.6185	2.28218	0.0486034	0.106851	-4.64139
MRP4	0.772265	15.1989	2.26971	0.0496011	0.108876	-4.66104
MDV1	1.25869	14.1239	2.26929	0.0496353	0.108876	-4.66171
RET2	0.730422	19.1988	2.26711	0.0498121	0.109141	-4.66514

## Sheet: (3) Enriched wildtype
Proteins enriched in the Puf3 interactome from wild type cells compared to that in mutant cells.
Symbol	logFC	AveExpr	t	P.Value	adj.P.Val	B	negLogP
PEX6	-3.22764	14.2365	-8.36344	1.62441e-05	0.0318546	3.19815	4.78931
ZDS2	-3.0996	14.5274	-6.95222	6.9237e-05	0.0601354	2.01426	4.15966
SIR4	-3.72592	18.6139	-6.65678	9.63735e-05	0.0601354	1.73215	4.01604
RQC1	-3.37472	14.818	-6.44691	0.000122663	0.0601354	1.52385	3.91129
HCS1	-2.33576	13.8887	-6.04097	0.00019865	0.0779104	1.10155	3.70191
VBA4	-2.29804	15.1589	-5.74075	0.000287667	0.0805878	0.772212	3.54111
FAS2	-2.50824	18.4118	-5.6011	0.000343147	0.0841139	0.613937	3.46452
PKC1	-1.7879	15.6235	-5.3481	0.000475567	0.0972707	0.318821	3.32279
CHS1	-2.85935	14.3236	-5.20528	0.000574032	0.0972707	0.14742	3.24106
RQT4	-2.45009	17.292	-5.12541	0.000638548	0.0972707	0.0500286	3.19481
VPS41	-1.76303	16.542	-5.11809	0.000644834	0.0972707	0.0410584	3.19055
SSD1	-1.59551	19.1302	-4.99504	0.00076128	0.10304	-0.111286	3.11846
PYC1	-2.15911	14.0789	-4.95287	0.000806246	0.10304	-0.16409	3.09353
PRE7	-1.85452	16.6254	-4.88824	0.000880818	0.10304	-0.245621	3.05511
RTT10	-2.38947	15.5745	-4.87803	0.000893257	0.10304	-0.25856	3.04902
YMR315W	-2.20846	16.1739	-4.82376	0.000962665	0.104877	-0.327675	3.01652
NUP170	-1.90135	15.4635	-4.69245	0.00115576	0.112691	-0.496975	2.93713
AKL1	-1.86562	15.4404	-4.68453	0.00116867	0.112691	-0.507281	2.93231
VIR1	-1.83413	14.865	-4.62547	0.00126996	0.112691	-0.584481	2.89621
QNS1	-2.16701	15.8838	-4.59847	0.00131936	0.112691	-0.619964	2.87964
SMY2	-2.04501	17.3031	-4.56614	0.00138125	0.112691	-0.662617	2.85973
YVH1	-1.91998	14.0299	-4.5445	0.00142441	0.112691	-0.691269	2.84637
IDP1	-1.93997	13.7392	-4.52896	0.00145629	0.112691	-0.711891	2.83675
SEC16	-1.90703	17.4549	-4.48491	0.00155091	0.112691	-0.770577	2.80941
MATALPHA2	-3.2311	14.7315	-4.4846	0.00155159	0.112691	-0.770988	2.80922
PRE3	-2.09306	19.2286	-4.42388	0.00169299	0.114798	-0.852401	2.77135
SSA2	-1.40023	22.7514	-4.42197	0.00169767	0.114798	-0.854981	2.77015
CDC60	-1.76635	17.8337	-4.24165	0.00220663	0.131933	-1.10042	2.65627
ERG10	-1.99803	16.6651	-4.23993	0.00221221	0.131933	-1.10279	2.65517
SSA1	-1.41644	21.1374	-4.2373	0.00222076	0.131933	-1.10641	2.6535
UBX7	-2.65228	15.3969	-4.18615	0.00239438	0.131933	-1.17705	2.62081
MKT1	-1.49979	17.3312	-4.17848	0.00242162	0.131933	-1.18767	2.61589
SET3	-1.78172	16.6322	-4.17541	0.00243264	0.131933	-1.19193	2.61392
VTC5	-1.90952	13.4435	-4.1468	0.00253775	0.131933	-1.23166	2.59555
ASK10	-1.90626	15.0623	-4.13231	0.00259281	0.131933	-1.25183	2.58623
PRS3	-1.3967	16.2925	-4.12238	0.00263128	0.131933	-1.26567	2.57983
ALA1	-2.26732	16.6012	-4.1151	0.0026599	0.131933	-1.27584	2.57514
YMR196W	-2.14669	15.8308	-4.07317	0.00283114	0.131933	-1.33451	2.54804
YIR035C	-2.20525	16.0104	-4.05459	0.00291073	0.131933	-1.3606	2.536
AIM21	-1.44472	15.4503	-4.03886	0.00297999	0.131933	-1.38273	2.52578
SSB1	-1.45993	22.084	-4.02246	0.00305404	0.131933	-1.40583	2.51512
NPL4	-1.43642	16.6467	-4.01106	0.00310667	0.131933	-1.42192	2.5077
SSB2	-1.95012	18.8675	-4.0024	0.00314731	0.131933	-1.43416	2.50206
VAS1	-2.44126	16.1287	-3.99648	0.00317539	0.131933	-1.44252	2.4982
RAD5	-1.81607	15.6099	-3.97481	0.00328054	0.131933	-1.47321	2.48406
ETP1	-1.91368	14.1561	-3.95494	0.00338023	0.131933	-1.50142	2.47105
MNN1	-1.67286	15.1671	-3.93957	0.0034595	0.131933	-1.52326	2.46099
PRS5	-1.48821	16.3445	-3.93215	0.00349847	0.131933	-1.53382	2.45612
TCO89	-1.43662	14.4551	-3.91598	0.00358502	0.132646	-1.55686	2.44551
ADE17	-3.27936	14.2538	-3.85775	0.00391607	0.135079	-1.64017	2.40715
SHE3	-1.24398	15.7192	-3.85494	0.00393283	0.135079	-1.6442	2.40529
ABD1	-1.58495	16.1872	-3.85435	0.00393637	0.135079	-1.64505	2.4049
TBF1	-1.73686	16.8851	-3.84337	0.00400271	0.135079	-1.66082	2.39765
NUP188	-1.56895	16.9974	-3.81449	0.00418284	0.135079	-1.70237	2.37853
GSY2	-1.80989	14.93	-3.80922	0.00421668	0.135079	-1.70998	2.37503
PRO2	-2.13283	14.9714	-3.80635	0.0042352	0.135079	-1.71411	2.37313
LEC1	-2.03773	15.2359	-3.80327	0.00425514	0.135079	-1.71855	2.37109
COG5	-1.88725	14.43	-3.79395	0.00431621	0.135079	-1.732	2.3649
UGP1	-2.4523	19.2699	-3.79041	0.00433961	0.135079	-1.73711	2.36255
BUD3	-1.29498	13.9716	-3.77764	0.00442525	0.135413	-1.75556	2.35406
TAO3	-2.08283	15.5157	-3.76294	0.00452606	0.135413	-1.77683	2.34428
HDA1	-2.63451	14.8194	-3.75843	0.00455748	0.135413	-1.78337	2.34127
TOP2	-2.76602	16.6822	-3.71399	0.0048796	0.13629	-1.84788	2.31162
GPP1	-1.1937	18.74	-3.70359	0.00495837	0.13629	-1.86302	2.30466
PSK1	-1.36417	14.2154	-3.70318	0.00496149	0.13629	-1.86361	2.30439
STT4	-1.34907	16.4817	-3.68881	0.0050727	0.13629	-1.88456	2.29476
TKL1	-1.89805	14.6262	-3.68529	0.00510029	0.13629	-1.88968	2.29241
SPA2	-1.92423	15.5826	-3.67793	0.0051586	0.13629	-1.90043	2.28747
EPS1	-1.54868	17.2293	-3.67773	0.00516019	0.13629	-1.90072	2.28733
KTR3	-2.08932	16.6848	-3.66998	0.00522228	0.13629	-1.91202	2.28214
SEC17	-1.54015	15.9186	-3.64856	0.00539822	0.13629	-1.94334	2.26775
ALD6	-1.25208	17.9804	-3.64723	0.0054093	0.13629	-1.94528	2.26686
TYW1	-1.14973	15.0846	-3.64584	0.005421	0.13629	-1.94733	2.26592
SRP68	-1.15832	17.9223	-3.58678	0.00594135	0.142329	-2.03398	2.22611
SSE1	-1.17956	19.5133	-3.57856	0.00601777	0.142329	-2.04607	2.22056
TCB1	-1.6004	14.938	-3.57	0.00609852	0.142329	-2.05868	2.21478
RPN1	-1.17182	19.2665	-3.56341	0.0061615	0.142329	-2.06839	2.21031
MHP1	-1.24465	15.0464	-3.56282	0.00616713	0.142329	-2.06926	2.20992
CHA1	-1.56766	20.1828	-3.56039	0.00619053	0.142329	-2.07284	2.20827
CYS4	-1.30136	18.4998	-3.55922	0.00620186	0.142329	-2.07457	2.20748
VAN1	-1.73495	14.7203	-3.55432	0.00624939	0.142329	-2.08179	2.20416
PBY1	-1.35091	16.7265	-3.54768	0.00631446	0.142329	-2.09158	2.19966
WWM1	-2.28849	13.8256	-3.51992	0.00659429	0.14406	-2.13259	2.18083
POM152	-1.95466	15.6347	-3.51824	0.00661162	0.14406	-2.13508	2.17969
MCM4	-1.51882	17.715	-3.50163	0.0067857	0.145113	-2.15966	2.16841
MCM5	-1.69536	17.571	-3.49793	0.00682516	0.145113	-2.16514	2.16589
SLM1	-1.33594	17.4113	-3.48335	0.00698292	0.145113	-2.18676	2.15596
FUN30	-1.66655	14.9956	-3.47985	0.00702133	0.145113	-2.19195	2.15358
PSP2	-1.31077	15.5937	-3.47907	0.00702996	0.145113	-2.19311	2.15305
SRP72	-1.14522	17.3227	-3.46019	0.00724136	0.146395	-2.22113	2.14018
GNP1	-1.84087	15.2094	-3.45149	0.00734107	0.146896	-2.23407	2.13424
RGC1	-1.46874	16.1723	-3.43543	0.00752873	0.147107	-2.25795	2.12328
TCB3	-1.22548	16.4875	-3.43172	0.00757283	0.147107	-2.26347	2.12074
CBR1	-1.4567	17.2279	-3.43083	0.00758351	0.147107	-2.26481	2.12013
TOR1	-1.53901	16.2657	-3.3945	0.00803039	0.151999	-2.31897	2.09526
RPN12	-1.1555	17.0641	-3.39207	0.00806116	0.151999	-2.32258	2.0936
PDX3	-2.04854	14.0467	-3.369	0.00836041	0.153408	-2.35706	2.07777
SSH1	-1.29737	15.1215	-3.36464	0.00841827	0.153408	-2.36358	2.07478
CET1	-1.47606	15.5983	-3.36159	0.00845894	0.153408	-2.36814	2.07268
NUP133	-1.84615	17.4919	-3.35271	0.00857864	0.153408	-2.38143	2.06658
MMF1	-1.5144	17.01	-3.35136	0.008597	0.153408	-2.38345	2.06565
STE11	-1.20352	16.066	-3.35075	0.00860525	0.153408	-2.38436	2.06524
MCM2	-1.89164	15.4697	-3.34427	0.00869395	0.153593	-2.39406	2.06078
OLE1	-2.1335	14.5375	-3.31103	0.0091644	0.157848	-2.4439	2.0379
IKI3	-1.09175	17.584	-3.31021	0.00917626	0.157848	-2.44512	2.03733
NVJ2	-1.27504	14.2076	-3.30281	0.00928475	0.158325	-2.45624	2.03223
SVL3	-1.072	16.579	-3.28322	0.00957823	0.161389	-2.48566	2.01871
CDC31	-1.21237	15.777	-3.2799	0.00962903	0.161389	-2.49067	2.01642
GSP2	-1.28875	19.1082	-3.26899	0.00979758	0.161521	-2.50707	2.00888
BRE1	-1.26543	16.4857	-3.25506	0.0100173	0.162379	-2.52804	1.99925
NUM1	-1.52855	16.9882	-3.24977	0.0101021	0.162379	-2.53601	1.99559
NBA1	-1.56745	13.9785	-3.23663	0.0103158	0.16266	-2.5558	1.9865
GUK1	-3.51635	14.1928	-3.22881	0.0104453	0.16266	-2.56759	1.98108
RKR1	-1.15142	16.6116	-3.21859	0.0106171	0.16266	-2.58301	1.97399
VMA2	-1.11893	23.2397	-3.2099	0.0107655	0.16266	-2.59612	1.96797
ENT5	-1.03143	16.4152	-3.20398	0.0108676	0.16266	-2.60505	1.96386
SNF7	-1.01155	15.6215	-3.20131	0.0109141	0.16266	-2.60908	1.96201
KIC1	-1.09327	14.86	-3.20122	0.0109158	0.16266	-2.60923	1.96195
RAD23	-1.12277	15.2029	-3.18747	0.0111584	0.16266	-2.63	1.9524
DCK1	-1.52961	15.7902	-3.18454	0.0112107	0.16266	-2.63442	1.95037
UBP7	-1.22965	14.0874	-3.17989	0.0112944	0.16266	-2.64145	1.94714
UBP14	-1.56076	14.3413	-3.1785	0.0113197	0.16266	-2.64356	1.94617
RPO31	-1.07638	17.7312	-3.17736	0.0113402	0.16266	-2.64527	1.94538
BRO1	-1.25255	16.5983	-3.1693	0.0114875	0.16266	-2.65746	1.93978
RTG3	-1.86247	14.593	-3.16622	0.0115443	0.16266	-2.66212	1.93763
RPT3	-1.1965	18.7124	-3.16593	0.0115496	0.16266	-2.66256	1.93743
YKL075C	-1.08667	15.376	-3.16254	0.0116126	0.16266	-2.6677	1.93507
BRF1	-1.31642	14.5308	-3.14924	0.0118626	0.1639	-2.68782	1.92582
HSP26	-2.21297	17.9788	-3.14894	0.0118683	0.1639	-2.68827	1.92561
SKT5	-1.12159	17.3429	-3.14129	0.0120148	0.164762	-2.69986	1.92028
HAT1	-1.19419	14.6163	-3.12568	0.0123195	0.166403	-2.72351	1.90941
SUA7	-1.22775	16.8888	-3.11787	0.0124749	0.166403	-2.73534	1.90396
BEM3	-1.17464	14.3133	-3.11747	0.0124829	0.166403	-2.73595	1.90368
RPP2B	-1.36663	21.0848	-3.1125	0.012583	0.166403	-2.74349	1.90022
TIM44	-1.04237	15.8574	-3.10951	0.0126435	0.166403	-2.74802	1.89813
SIS1	-1.11836	20.3903	-3.10093	0.0128191	0.167589	-2.76104	1.89214
PUF4	-3.68936	18.3329	-3.06979	0.0134775	0.173878	-2.80831	1.87039
VPH1	-1.45381	16.2463	-3.06098	0.0136701	0.17521	-2.8217	1.86423
RSC1	-2.07055	15.3305	-3.03921	0.014158	0.177058	-2.85478	1.849
YKL033W-A	-1.16793	24.8436	-3.02871	0.0143998	0.177058	-2.87075	1.84164
PDC2	-1.24125	15.9566	-3.02692	0.0144415	0.177058	-2.87347	1.84039
DSL1	-1.18467	15.3571	-3.02473	0.0144926	0.177058	-2.87681	1.83885
PAN1	-1.40365	16.2309	-3.02326	0.014527	0.177058	-2.87904	1.83782
DED1	-1.09725	19.6146	-3.02245	0.014546	0.177058	-2.88028	1.83726
RPL7B	-0.989608	18.6648	-3.02061	0.0145891	0.177058	-2.88307	1.83597
SGD1	-1.45441	16.36	-3.00856	0.0148757	0.177874	-2.90141	1.82752
ELP3	-1.19788	17.7807	-2.99916	0.0151033	0.179133	-2.91572	1.82093
RIF1	-1.12575	14.9043	-2.98798	0.0153785	0.179133	-2.93274	1.81309
RPT2	-1.09592	18.7531	-2.9856	0.0154378	0.179133	-2.93636	1.81142
MTR10	-1.20543	15.4439	-2.9737	0.0157376	0.181538	-2.95449	1.80306
PPZ1	-0.967424	15.4421	-2.96026	0.0160837	0.184445	-2.97498	1.79361
CTR86	-1.19579	16.4248	-2.95521	0.0162157	0.184877	-2.98268	1.79007
ABF1	-2.15355	16.3638	-2.94679	0.0164381	0.186186	-2.99551	1.78415
OCH1	-2.62565	15.0056	-2.94371	0.0165203	0.186186	-3.00021	1.78198
NOP12	-0.952397	19.0282	-2.92118	0.0171345	0.189553	-3.03457	1.76613
ERG13	-1.02303	17.0079	-2.92059	0.0171508	0.189553	-3.03546	1.76572
YTA6	-1.28828	14.2607	-2.91862	0.0172057	0.189553	-3.03848	1.76433
THR4	-1.36518	15.7378	-2.90887	0.0174797	0.191496	-3.05334	1.75747
LAS17	-1.19664	15.8843	-2.90536	0.0175796	0.19152	-3.0587	1.75499
RSC3	-0.968517	20.2587	-2.90146	0.0176912	0.191671	-3.06466	1.75224
EMP47	-1.52868	16.2648	-2.89304	0.0179344	0.192384	-3.0775	1.74631
ESL1	-1.41806	13.9466	-2.89239	0.0179533	0.192384	-3.07849	1.74586
YCS4	-1.19925	14.8772	-2.88156	0.0182717	0.194732	-3.09502	1.73822
SBE22	-1.2799	15.0339	-2.87231	0.0185481	0.195889	-3.10914	1.7317
ECM29	-1.18183	17.0839	-2.87125	0.01858	0.195889	-3.11076	1.73095
OYE2	-1.57195	14.4436	-2.86323	0.0188238	0.196361	-3.12301	1.72529
VPS15	-1.40525	14.0891	-2.8612	0.0188858	0.196361	-3.1261	1.72386
YBR225W	-1.69224	15.1282	-2.85992	0.0189252	0.196361	-3.12806	1.72296
RPN2	-1.44078	19.4915	-2.85201	0.0191701	0.197856	-3.14015	1.71738
TRM82	-1.67621	14.8558	-2.84306	0.0194509	0.199703	-3.15381	1.71106
AAP1	-0.986091	13.3993	-2.83878	0.0195868	0.199936	-3.16035	1.70804
VPS4	-1.01033	16.7312	-2.83105	0.0198345	0.199936	-3.17215	1.70258
IST2	-1.75379	16.7347	-2.83085	0.0198409	0.199936	-3.17246	1.70244
FKS1	-1.3178	18.8165	-2.82959	0.0198815	0.199936	-3.17437	1.70155
SPE3	-1.83871	15.5778	-2.81682	0.020299	0.201042	-3.19389	1.69253
LDO45	-3.40047	14.0312	-2.81136	0.0204801	0.201406	-3.20223	1.68867
IMD2	-2.21718	14.2854	-2.79784	0.0209355	0.202428	-3.22287	1.67912
EXO84	-1.57671	15.8914	-2.79727	0.0209551	0.202428	-3.22375	1.67871
END3	-1.26283	16.2392	-2.79338	0.0210881	0.202714	-3.22968	1.67596
PRT1	-0.907053	20.0121	-2.78612	0.0213389	0.204125	-3.24078	1.67083
ENO2	-1.20602	20.9471	-2.77682	0.0216647	0.205867	-3.25499	1.66425
MCM6	-1.38455	17.6383	-2.77198	0.021836	0.205867	-3.26237	1.66083
NOT3	-2.0223	16.9746	-2.767	0.0220141	0.206553	-3.26999	1.6573
RIA1	-1.02032	16.7166	-2.75923	0.0222945	0.208188	-3.28186	1.6518
CYR1	-1.27413	14.9033	-2.75125	0.0225864	0.209915	-3.29405	1.64615
HFD1	-3.96564	14.7604	-2.7414	0.0229519	0.21204	-3.30909	1.63918
ARO4	-2.06234	15.5564	-2.73928	0.0230314	0.21204	-3.31233	1.63768
THS1	-1.15613	17.589	-2.73508	0.0231896	0.212499	-3.31874	1.63471
DIG1	-1.04076	17.1903	-2.725	0.0235739	0.213546	-3.33413	1.62757
LSB5	-0.987822	14.8208	-2.71896	0.0238075	0.213546	-3.34337	1.62329
YPR089W	-1.27363	16.7395	-2.71868	0.0238184	0.213546	-3.3438	1.62309
MNN9	-0.939118	17.6198	-2.71537	0.0239473	0.213546	-3.34885	1.62074
GDH1	-1.2673	16.0498	-2.71237	0.0240649	0.213546	-3.35343	1.61862
SEC8	-1.04718	16.4906	-2.71055	0.0241362	0.213546	-3.3562	1.61733
COG7	-2.02858	14.6561	-2.70723	0.0242674	0.213546	-3.36128	1.61498
MAP1	-1.69276	16.0745	-2.70701	0.0242759	0.213546	-3.3616	1.61482
YGL117W	-1.40584	15.7691	-2.70681	0.0242839	0.213546	-3.36191	1.61468
HIS7	-1.05848	15.2945	-2.69546	0.0247378	0.215499	-3.37924	1.60664
MSN4	-1.49095	13.8771	-2.69501	0.0247564	0.215499	-3.37994	1.60631
NMA1	-1.62533	17.0268	-2.69305	0.0248356	0.215499	-3.38293	1.60492
RHO1	-1.03399	17.1573	-2.68808	0.0250378	0.216295	-3.39051	1.6014
COG4	-1.41989	14.7904	-2.68466	0.025178	0.216553	-3.39574	1.59898
CUE3	-1.24261	17.3573	-2.68015	0.0253638	0.217198	-3.40261	1.59579
SLC1	-1.10484	14.9085	-2.67488	0.0255834	0.217384	-3.41067	1.59204
UBR2	-1.04924	14.6629	-2.67237	0.0256881	0.217384	-3.41449	1.59027
FKH1	-1.66806	15.5794	-2.67166	0.0257181	0.217384	-3.41558	1.58976
SGN1	-1.71863	16.6181	-2.6609	0.0261739	0.217438	-3.432	1.58213
GRS1	-1.14624	18.9367	-2.65944	0.0262363	0.217438	-3.43422	1.5811
PRP6	-1.60411	14.5277	-2.65641	0.0263665	0.217438	-3.43885	1.57895
KAP104	-0.959311	18.1545	-2.65605	0.0263821	0.217438	-3.4394	1.57869
BEM1	-1.00819	16.9958	-2.63187	0.0274452	0.223098	-3.47629	1.56153
YCR043C	-2.52111	14.6218	-2.62879	0.0275837	0.223098	-3.48099	1.55935
RPN13	-0.816934	18.2751	-2.627	0.0276644	0.223098	-3.48371	1.55808
VMA13	-0.968078	19.5246	-2.62371	0.0278134	0.223098	-3.48872	1.55575
SSE2	-0.98154	17.2364	-2.62156	0.0279114	0.223098	-3.49201	1.55422
NOP56	-1.55154	20.9679	-2.61911	0.0280235	0.223098	-3.49575	1.55248
ZDS1	-1.20831	14.667	-2.61708	0.0281163	0.223098	-3.49883	1.55104
CDC37	-1.44755	14.7304	-2.61684	0.0281276	0.223098	-3.4992	1.55087
NIC96	-0.898129	17.4874	-2.61495	0.0282143	0.223098	-3.50208	1.54953
CDC28	-1.1163	19.1876	-2.60276	0.0287821	0.22318	-3.52066	1.54088
GLC7	-1.26667	16.3964	-2.60064	0.0288822	0.22318	-3.52389	1.53937
HHF1	-1.02042	21.0107	-2.60051	0.0288883	0.22318	-3.52409	1.53928
CSE1	-1.20258	17.6937	-2.60046	0.0288909	0.22318	-3.52417	1.53924
YFR016C	-1.40735	13.5981	-2.6001	0.0289076	0.22318	-3.52471	1.53899
RPL24A	-1.66967	19.8044	-2.58566	0.0295982	0.226727	-3.54672	1.52873
ADE2	-1.11569	18.8645	-2.58045	0.0298514	0.227362	-3.55465	1.52504
INP51	-1.98725	13.5999	-2.57193	0.0302702	0.227362	-3.56763	1.51898
RLF2	-1.28694	15.3376	-2.57052	0.0303402	0.227362	-3.56978	1.51798
HOM2	-0.819965	17.2188	-2.56846	0.0304425	0.227362	-3.57291	1.51652
CMD1	-0.938561	18.6577	-2.56457	0.0306368	0.227362	-3.57883	1.51376
CHS3	-1.05291	14.7581	-2.56323	0.0307038	0.227362	-3.58087	1.51281
RPT6	-0.800735	20.2704	-2.5542	0.0311607	0.227362	-3.59461	1.50639
EFR3	-1.01996	15.7269	-2.55186	0.03128	0.227362	-3.59817	1.50473
BUD27	-1.00509	16.0746	-2.54918	0.0314174	0.227362	-3.60225	1.50283
SRB5	-1.9781	15.255	-2.54668	0.0315461	0.227362	-3.60605	1.50105
RTC1	-1.15831	15.2369	-2.54248	0.0317632	0.227362	-3.61243	1.49808
SRO7	-1.0355	16.4554	-2.54233	0.0317711	0.227362	-3.61266	1.49797
MOT1	-1.46002	17.4635	-2.54178	0.0317998	0.227362	-3.6135	1.49758
CCL1	-1.13801	15.3453	-2.54174	0.0318017	0.227362	-3.61355	1.49755
GRX1	-1.36113	15.9091	-2.54007	0.0318888	0.227362	-3.6161	1.49636
KSP1	-2.16124	15.192	-2.53976	0.031905	0.227362	-3.61657	1.49614
TY1B-GR1	-0.964358	18.2453	-2.53917	0.0319356	0.227362	-3.61746	1.49572
YAP1	-1.02649	17.4537	-2.53512	0.0321482	0.227362	-3.62363	1.49284
YPR022C	-1.02034	15.6778	-2.53242	0.0322902	0.227362	-3.62773	1.49093
SKI2	-1.00318	16.9234	-2.53175	0.0323257	0.227362	-3.62875	1.49045
HIS4	-1.64439	14.8302	-2.53076	0.0323782	0.227362	-3.63026	1.48975
GRX7	-1.02721	15.2431	-2.52639	0.0326102	0.227362	-3.63689	1.48665
REH1	-1.04876	15.523	-2.52503	0.0326828	0.227362	-3.63896	1.48568
PBP1	-1.06604	19.9569	-2.52208	0.0328412	0.227362	-3.64345	1.48358
CAR1	-1.27353	14.371	-2.52189	0.0328511	0.227362	-3.64373	1.48345
ASG1	-1.50346	16.3405	-2.52071	0.0329147	0.227362	-3.64553	1.48261
FCF2	-1.15542	16.2734	-2.51709	0.0331104	0.227362	-3.65103	1.48004
IMH1	-1.31382	17.7803	-2.51572	0.0331842	0.227362	-3.6531	1.47907
CAR2	-1.54725	14.5392	-2.51305	0.0333295	0.227362	-3.65716	1.47717
SWI5	-1.52032	13.9718	-2.50811	0.0336001	0.227362	-3.66467	1.47366
SLH1	-1.56036	18.3448	-2.50475	0.0337854	0.227362	-3.66978	1.47127
IES3	-1.33959	15.7153	-2.50432	0.0338087	0.227362	-3.67042	1.47097
URB2	-1.51264	16.6979	-2.49978	0.0340609	0.227362	-3.67732	1.46774
HTZ1	-0.921828	16.785	-2.49761	0.0341822	0.227362	-3.68062	1.4662
EFB1	-1.02583	20.3634	-2.4967	0.0342328	0.227362	-3.68199	1.46556
IOC2	-0.987784	16.9955	-2.49335	0.034421	0.227362	-3.68708	1.46318
SUB2	-0.987912	20.4986	-2.49134	0.0345341	0.227362	-3.69012	1.46175
ADH6	-1.06834	15.4145	-2.48895	0.0346697	0.227362	-3.69376	1.46005
PAM1	-2.09282	14.4363	-2.48763	0.0347445	0.227362	-3.69575	1.45911
COP1	-0.85792	19.014	-2.48644	0.0348124	0.227362	-3.69757	1.45827
FKH2	-1.0642	15.971	-2.4854	0.0348716	0.227362	-3.69914	1.45753
MDN1	-0.824153	19.3131	-2.48192	0.0350704	0.227362	-3.70442	1.45506
YCF1	-2.03131	13.9099	-2.48132	0.0351046	0.227362	-3.70532	1.45464
EDC3	-1.06724	18.4725	-2.47657	0.0353787	0.227362	-3.71253	1.45126
KIN2	-1.16911	15.3385	-2.47446	0.0355009	0.227362	-3.71573	1.44976
PGK1	-1.06001	20.2089	-2.47436	0.0355064	0.227362	-3.71587	1.44969
CYC8	-0.891602	17.0414	-2.47434	0.0355079	0.227362	-3.71591	1.44967
EBS1	-1.42336	16.3605	-2.47378	0.0355403	0.227362	-3.71676	1.44928
TAF10	-1.73395	15.0313	-2.47286	0.0355941	0.227362	-3.71816	1.44862
ATP15	-2.615	14.2024	-2.46838	0.0358556	0.227486	-3.72494	1.44544
PBP4	-0.909568	18.7367	-2.46786	0.0358863	0.227486	-3.72574	1.44507
ALD4	-1.52561	17.4375	-2.4654	0.0360311	0.227486	-3.72947	1.44332
WHI4	-1.78981	15.1843	-2.46326	0.0361571	0.227486	-3.7327	1.44181
KAP114	-1.17128	16.0053	-2.46264	0.0361936	0.227486	-3.73364	1.44137
TAF3	-1.36846	15.1003	-2.45049	0.0369204	0.229304	-3.75205	1.43273
PAF1	-1.32349	17.1459	-2.44933	0.03699	0.229304	-3.7538	1.43192
FUN12	-0.774674	19.0958	-2.44776	0.0370851	0.229304	-3.75617	1.4308
MAK21	-0.793923	20.8862	-2.44479	0.0372661	0.229304	-3.76068	1.42869
SEC24	-0.861227	18.4122	-2.44467	0.0372735	0.229304	-3.76086	1.4286
UFD4	-0.985733	18.374	-2.44423	0.0372998	0.229304	-3.76152	1.42829
HOC1	-0.87136	17.3563	-2.44323	0.037361	0.229304	-3.76303	1.42758
GCR2	-1.08276	15.9045	-2.4423	0.0374182	0.229304	-3.76445	1.42692
CUE5	-1.58918	16.0602	-2.43465	0.0378886	0.230626	-3.77601	1.42149
TIF5	-0.933779	18.263	-2.42997	0.0381801	0.230626	-3.7831	1.41816
INP52	-0.872436	15.4068	-2.42865	0.0382624	0.230626	-3.78509	1.41723
SEC6	-1.62699	16.6534	-2.4186	0.0388961	0.231961	-3.80028	1.41009
RPS0A	-1.15702	20.2509	-2.41828	0.0389164	0.231961	-3.80076	1.40987
YML119W	-1.18082	15.7785	-2.41163	0.0393419	0.233786	-3.81081	1.40514
DBF2	-0.987447	16.9193	-2.40917	0.0395008	0.234022	-3.81454	1.40339
HLJ1	-2.04386	13.7953	-2.40338	0.0398763	0.234092	-3.82328	1.39929
HTB1	-0.930626	22.5102	-2.40226	0.0399491	0.234092	-3.82496	1.39849
ALY2	-0.892542	17.4348	-2.39913	0.0401539	0.234092	-3.82969	1.39627
KAR4	-1.21455	16.1132	-2.39784	0.0402391	0.234092	-3.83164	1.39535
NSE3	-1.08006	14.8846	-2.39665	0.040317	0.234092	-3.83343	1.39451
CCA1	-2.25274	14.6767	-2.39466	0.0404486	0.234092	-3.83644	1.3931
SNF5	-0.947383	17.8483	-2.39445	0.0404627	0.234092	-3.83676	1.39295
RET3	-1.59547	17.0007	-2.39423	0.0404769	0.234092	-3.83708	1.39279
PRI1	-1.14939	16.7311	-2.39025	0.0407415	0.234092	-3.8431	1.38996
SFB3	-1.29099	15.2316	-2.38973	0.0407758	0.234092	-3.84387	1.3896
CTF4	-1.55025	14.4354	-2.38798	0.0408924	0.234092	-3.84651	1.38836
RPL6B	-1.06708	19.7518	-2.38584	0.0410361	0.234092	-3.84975	1.38683
RGD2	-1.07946	16.1923	-2.38364	0.041184	0.234092	-3.85307	1.38527
SST2	-2.06624	17.4381	-2.38159	0.0413217	0.234196	-3.85614	1.38382
ASN1	-2.19017	14.9765	-2.37757	0.0415939	0.23506	-3.8622	1.38097
APM3	-1.13855	16.6131	-2.37002	0.0421104	0.236615	-3.87358	1.37561
RRP3	-0.957623	19.0211	-2.36537	0.0424319	0.237291	-3.88059	1.37231
AHP1	-1.42377	18.138	-2.36478	0.0424728	0.237291	-3.88148	1.37189
ITC1	-1.25852	15.5749	-2.36251	0.04263	0.237493	-3.88489	1.37028
VPS34	-0.948118	15.1266	-2.36022	0.0427899	0.237708	-3.88833	1.36866
SEC28	-1.17782	18.276	-2.35619	0.0430726	0.238502	-3.8944	1.3658
RPP1B	-1.43165	19.9268	-2.35472	0.043176	0.238502	-3.89661	1.36476
NSP1	-0.945697	16.9525	-2.35178	0.0433845	0.238834	-3.90105	1.36267
LEO1	-1.00695	16.2281	-2.34789	0.043661	0.238834	-3.9069	1.35991
UTP10	-0.932208	18.9285	-2.34544	0.0438357	0.238834	-3.91057	1.35817
MET17	-1.06686	17.8772	-2.34542	0.0438369	0.238834	-3.9106	1.35816
LCP5	-0.822686	16.9481	-2.34531	0.0438451	0.238834	-3.91077	1.35808
GGC1	-2.4034	15.9446	-2.34008	0.0442213	0.240216	-3.91863	1.35437
NMD2	-1.08193	14.7942	-2.33515	0.0445783	0.24127	-3.92603	1.35088
OSH3	-1.42573	15.3834	-2.33401	0.0446614	0.24127	-3.92774	1.35007
LST8	-1.16186	17.3332	-2.32977	0.0449719	0.241722	-3.93412	1.34706
COG3	-1.18234	15.4607	-2.3282	0.0450873	0.241722	-3.93648	1.34595
YBP1	-1.24651	17.8114	-2.32782	0.0451149	0.241722	-3.93704	1.34568
APL1	-0.820168	16.9271	-2.32352	0.0454328	0.24176	-3.94349	1.34263
RPP2A	-1.07705	20.8058	-2.31809	0.0458372	0.24176	-3.95164	1.33878
NDI1	-1.10003	16.0456	-2.31642	0.0459626	0.24176	-3.95415	1.3376
SYH1	-0.90968	18.1628	-2.31353	0.04618	0.24176	-3.95849	1.33555
ILV2	-0.790332	20.8258	-2.31048	0.0464102	0.24176	-3.96305	1.33339
CLA4	-1.13947	15.3624	-2.3089	0.0465299	0.24176	-3.96542	1.33227
RPA135	-0.826555	19.96	-2.3088	0.0465377	0.24176	-3.96557	1.3322
FAA1	-1.0457	16.7279	-2.30853	0.0465584	0.24176	-3.96598	1.332
SMC3	-0.995993	18.258	-2.30696	0.0466775	0.24176	-3.96833	1.33089
HAT2	-1.0403	18.7502	-2.30696	0.0466775	0.24176	-3.96833	1.33089
OSH6	-1.28565	14.0112	-2.30668	0.0466988	0.24176	-3.96875	1.33069
TFC4	-1.06122	15.2317	-2.30634	0.0467246	0.24176	-3.96926	1.33045
ARP3	-0.846099	20.1329	-2.30315	0.0469688	0.242063	-3.97404	1.32819
GCN20	-0.832955	17.8971	-2.30235	0.0470302	0.242063	-3.97524	1.32762
PUP3	-2.40219	14.5576	-2.30003	0.0472089	0.242347	-3.97872	1.32598
ACF4	-1.17591	15.2744	-2.2952	0.0475818	0.243624	-3.98595	1.32256
NUP84	-0.878139	16.0276	-2.2933	0.0477299	0.243729	-3.9888	1.32121
HSE1	-0.772982	16.5109	-2.29028	0.0479651	0.243729	-3.99331	1.31908
ARP5	-1.02526	16.5106	-2.29015	0.0479752	0.243729	-3.9935	1.31898
RMD8	-0.97578	14.0276	-2.28441	0.0484269	0.245238	-4.0021	1.31491
ARC18	-1.8066	16.7883	-2.2832	0.0485224	0.245238	-4.0039	1.31406
ARL3	-0.937762	15.9053	-2.27628	0.0490726	0.24661	-4.01424	1.30916
VPS53	-0.861343	14.6483	-2.27494	0.04918	0.24661	-4.01624	1.30821
SHQ1	-1.32996	15.1822	-2.27207	0.049411	0.24661	-4.02054	1.30618
CDC73	-1.0605	16.7209	-2.2716	0.0494489	0.24661	-4.02124	1.30584
SAC1	-1.30467	15.0112	-2.27037	0.0495483	0.24661	-4.02308	1.30497
YBL036C	-1.13266	16.0904	-2.2685	0.0496992	0.246698	-4.02587	1.30365
SLY1	-0.891139	17.2568	-2.26492	0.0499902	0.246916	-4.03121	1.30112

## Sheet: (4) Enriched mutant 
Proteins enriched in the Puf3 interactome from not4D compared to wild type cells.
Symbol	logFC	AveExpr	t	P.Value	adj.P.Val	B	negLogP
MRPL8	2.0115	16.3025	5.77345	0.000276135	0.0805878	0.808803	3.55888
MRM1	1.84373	15.3387	5.2086	0.000571511	0.0972707	0.151438	3.24298
IMG2	1.7116	16.5033	4.09968	0.00272153	0.131933	-1.29737	2.56519
MRPL51	1.51941	17.1819	3.95886	0.00336028	0.131933	-1.49584	2.47362
MRP51	1.81014	15.1961	3.68197	0.00512651	0.13629	-1.89453	2.29018
PPN1	1.91964	15.8378	3.52671	0.00652467	0.14406	-2.12256	2.18544
MRPL20	1.33226	18.5971	3.47019	0.0071286	0.145616	-2.20629	2.147
MRPL9	1.34617	17.2778	3.42515	0.00765164	0.147107	-2.27327	2.11625
AAD16	2.07066	15.3808	3.33497	0.00882293	0.15448	-2.40799	2.05439
MRPL3	1.68494	17.9531	3.26873	0.00980164	0.161521	-2.50746	2.0087
MYO4	1.89265	17.9997	3.25064	0.0100881	0.162379	-2.53469	1.99619
MIA40	1.18072	14.4848	3.17854	0.0113188	0.16266	-2.64349	1.9462
GEP5	2.09226	14.7425	3.16654	0.0115385	0.16266	-2.66165	1.93785
MRPL13	1.31128	17.6797	3.13602	0.0121168	0.165008	-2.70784	1.91661
MRX1	0.982275	18.6003	3.07873	0.0132851	0.17253	-2.79474	1.87664
REX4	0.931628	15.8075	3.02147	0.0145689	0.177058	-2.88176	1.83657
MRPL4	1.39341	17.0041	3.01726	0.0146682	0.177058	-2.88817	1.83362
MRPL23	1.46458	16.5949	3.0152	0.0147172	0.177058	-2.89131	1.83217
Puf3_TAP	1.27969	21.5926	2.99334	0.015246	0.179133	-2.92459	1.81684
MRP7	1.40882	16.3712	2.98917	0.0153489	0.179133	-2.93093	1.81392
YHB1	3.55022	21.3375	2.9219	0.0171144	0.189553	-3.03347	1.76664
RRG8	1.49568	16.3948	2.82463	0.0200427	0.200529	-3.18196	1.69804
IRC25	1.23134	15.8027	2.81768	0.0202705	0.201042	-3.19257	1.69314
MRPL49	1.37275	15.081	2.80953	0.0205411	0.201406	-3.20502	1.68738
RRM3	1.00265	16.3532	2.80249	0.0207778	0.202428	-3.21578	1.6824
MHR1	1.12173	16.7768	2.77205	0.0218336	0.205867	-3.26227	1.66088
RML2	1.09594	16.0999	2.66297	0.0260855	0.217438	-3.42883	1.5836
MRPL35	1.06769	17.9305	2.65587	0.0263898	0.217438	-3.43967	1.57856
MRPL10	1.11195	16.5566	2.65003	0.0266429	0.218605	-3.44859	1.57442
PEP8	1.15914	15.0295	2.6014	0.0288464	0.22318	-3.52274	1.53991
MRPL28	0.975608	17.271	2.58688	0.0295393	0.226727	-3.54486	1.5296
YML6	1.41893	18.0227	2.56677	0.0305266	0.227362	-3.57548	1.51532
RMD9	1.03118	17.3741	2.5185	0.0330336	0.227362	-3.64888	1.48104
RRG9	1.12291	16.7488	2.43968	0.0375786	0.229569	-3.76841	1.42506
VAR1	1.10906	15.2931	2.4324	0.0380288	0.230626	-3.77943	1.41989
IMG1	1.01015	16.7048	2.42742	0.0383397	0.230626	-3.78696	1.41635
TOM40	1.13727	16.1671	2.41935	0.0388488	0.231961	-3.79916	1.41062
RPM2	1.41178	17.0451	2.38373	0.041178	0.234092	-3.85293	1.38534
CPS1	0.76163	18.9887	2.37542	0.0417404	0.235209	-3.86544	1.37944
CSN3	2.55316	14.4264	2.31343	0.0461872	0.24176	-3.95863	1.33548
STE20	0.991254	21.708	2.28141	0.0486642	0.245322	-4.00658	1.31279
MRPL11	1.0527	16.9526	2.26704	0.0498176	0.246698	-4.02805	1.30262

## Sheet: (5) Enriched & present wildtype
Enriched in wild type over mutant and Present in wild type over untagged control.
Symbol	logFC	AveExpr	t	P.Value	adj.P.Val	B	negLogP
PEX6	-3.22764	14.2365	-8.36344	1.6244e-05	0.0318546	3.19815	4.78931
ZDS2	-3.0996	14.5274	-6.95222	6.9237e-05	0.0601355	2.01426	4.15966
SIR4	-3.72592	18.6139	-6.65678	9.6373e-05	0.0601355	1.73215	4.01604
RQC1	-3.37472	14.818	-6.44691	0.00012266	0.0601355	1.52385	3.91129
HCS1	-2.33576	13.8887	-6.04097	0.00019865	0.0779104	1.10155	3.70191
VBA4	-2.29804	15.1589	-5.74075	0.00028767	0.0805878	0.772212	3.54111
FAS2	-2.50824	18.4118	-5.6011	0.00034315	0.0841139	0.613937	3.46452
PKC1	-1.7879	15.6235	-5.3481	0.00047557	0.0972707	0.318821	3.32279
CHS1	-2.85935	14.3236	-5.20528	0.00057403	0.0972707	0.14742	3.24106
RQT4	-2.45009	17.292	-5.12541	0.00063855	0.0972707	0.0500286	3.19481
VPS41	-1.76303	16.542	-5.11809	0.00064483	0.0972707	0.0410584	3.19055
SSD1	-1.59551	19.1302	-4.99504	0.00076128	0.10304	-0.111286	3.11846
PYC1	-2.15911	14.0789	-4.95287	0.00080625	0.10304	-0.16409	3.09353
PRE7	-1.85452	16.6254	-4.88824	0.00088082	0.10304	-0.245621	3.05511
RTT10	-2.38947	15.5745	-4.87803	0.00089326	0.10304	-0.25856	3.04902
NUP170	-1.90135	15.4635	-4.69245	0.00115576	0.112691	-0.496975	2.93713
AKL1	-1.86562	15.4404	-4.68453	0.00116867	0.112691	-0.507281	2.93231
VIR1	-1.83413	14.865	-4.62547	0.00126996	0.112691	-0.584481	2.89621
QNS1	-2.16701	15.8838	-4.59847	0.00131936	0.112691	-0.619964	2.87964
SMY2	-2.04501	17.3031	-4.56614	0.00138125	0.112691	-0.662617	2.85973
YVH1	-1.91998	14.0299	-4.5445	0.00142441	0.112691	-0.691269	2.84637
IDP1	-1.93997	13.7392	-4.52896	0.00145629	0.112691	-0.711891	2.83675
SEC16	-1.90703	17.4549	-4.48491	0.00155091	0.112691	-0.770577	2.80941
PRE3	-2.09306	19.2286	-4.42388	0.00169299	0.114798	-0.852401	2.77135
SSA2	-1.40023	22.7514	-4.42197	0.00169767	0.114798	-0.854981	2.77015
SSA1	-1.41644	21.1374	-4.2373	0.00222076	0.131933	-1.10641	2.6535
UBX7	-2.65228	15.3969	-4.18615	0.00239438	0.131933	-1.17705	2.62081
MKT1	-1.49979	17.3312	-4.17848	0.00242162	0.131933	-1.18767	2.61589
SET3	-1.78172	16.6322	-4.17541	0.00243264	0.131933	-1.19193	2.61392
VTC5	-1.90952	13.4435	-4.1468	0.00253775	0.131933	-1.23166	2.59555
ASK10	-1.90626	15.0623	-4.13231	0.00259281	0.131933	-1.25183	2.58623
YIR035C	-2.20525	16.0104	-4.05459	0.00291073	0.131933	-1.3606	2.536
SSB1	-1.45993	22.084	-4.02246	0.00305404	0.131933	-1.40583	2.51512
NPL4	-1.43642	16.6467	-4.01106	0.00310667	0.131933	-1.42192	2.5077
SSB2	-1.95012	18.8675	-4.0024	0.00314731	0.131933	-1.43416	2.50206
VAS1	-2.44126	16.1287	-3.99648	0.00317539	0.131933	-1.44252	2.4982
RAD5	-1.81607	15.6099	-3.97481	0.00328054	0.131933	-1.47321	2.48406
ETP1	-1.91368	14.1561	-3.95494	0.00338023	0.131933	-1.50142	2.47105
MNN1	-1.67286	15.1671	-3.93957	0.0034595	0.131933	-1.52326	2.46099
PRS5	-1.48821	16.3445	-3.93215	0.00349847	0.131933	-1.53382	2.45612
TCO89	-1.43662	14.4551	-3.91598	0.00358502	0.132646	-1.55686	2.44551
ADE17	-3.27936	14.2538	-3.85775	0.00391607	0.135079	-1.64017	2.40715
SHE3	-1.24398	15.7192	-3.85494	0.00393283	0.135079	-1.6442	2.40529
ABD1	-1.58495	16.1872	-3.85435	0.00393637	0.135079	-1.64505	2.4049
NUP188	-1.56895	16.9974	-3.81449	0.00418284	0.135079	-1.70237	2.37853
GSY2	-1.80989	14.93	-3.80922	0.00421668	0.135079	-1.70998	2.37503
PRO2	-2.13283	14.9714	-3.80635	0.0042352	0.135079	-1.71411	2.37313
LEC1	-2.03773	15.2359	-3.80327	0.00425514	0.135079	-1.71855	2.37109
COG5	-1.88725	14.43	-3.79395	0.00431621	0.135079	-1.732	2.3649
UGP1	-2.4523	19.2699	-3.79041	0.00433961	0.135079	-1.73711	2.36255
BUD3	-1.29498	13.9716	-3.77764	0.00442525	0.135413	-1.75556	2.35406
TAO3	-2.08283	15.5157	-3.76294	0.00452606	0.135413	-1.77683	2.34428
HDA1	-2.63451	14.8194	-3.75843	0.00455748	0.135413	-1.78337	2.34127
TOP2	-2.76602	16.6822	-3.71399	0.0048796	0.13629	-1.84788	2.31162
GPP1	-1.1937	18.74	-3.70359	0.00495837	0.13629	-1.86302	2.30466
PSK1	-1.36417	14.2154	-3.70318	0.00496149	0.13629	-1.86361	2.30439
STT4	-1.34907	16.4817	-3.68881	0.0050727	0.13629	-1.88456	2.29476
SPA2	-1.92423	15.5826	-3.67793	0.0051586	0.13629	-1.90043	2.28747
EPS1	-1.54868	17.2293	-3.67773	0.00516019	0.13629	-1.90072	2.28733
KTR3	-2.08932	16.6848	-3.66998	0.00522228	0.13629	-1.91202	2.28214
SEC17	-1.54015	15.9186	-3.64856	0.00539822	0.13629	-1.94334	2.26775
ALD6	-1.25208	17.9804	-3.64723	0.0054093	0.13629	-1.94528	2.26686
TYW1	-1.14973	15.0846	-3.64584	0.005421	0.13629	-1.94733	2.26592
SRP68	-1.15832	17.9223	-3.58678	0.00594135	0.142329	-2.03398	2.22611
SSE1	-1.17956	19.5133	-3.57856	0.00601777	0.142329	-2.04607	2.22056
TCB1	-1.6004	14.938	-3.57	0.00609852	0.142329	-2.05868	2.21478
RPN1	-1.17182	19.2665	-3.56341	0.0061615	0.142329	-2.06839	2.21031
MHP1	-1.24465	15.0464	-3.56282	0.00616713	0.142329	-2.06926	2.20992
CHA1	-1.56766	20.1828	-3.56039	0.00619053	0.142329	-2.07284	2.20827
VAN1	-1.73495	14.7203	-3.55432	0.00624939	0.142329	-2.08179	2.20416
PBY1	-1.35091	16.7265	-3.54768	0.00631446	0.142329	-2.09158	2.19966
WWM1	-2.28849	13.8256	-3.51992	0.00659429	0.14406	-2.13259	2.18083
POM152	-1.95466	15.6347	-3.51824	0.00661162	0.14406	-2.13508	2.17969
MCM4	-1.51882	17.715	-3.50163	0.0067857	0.145113	-2.15966	2.16841
MCM5	-1.69536	17.571	-3.49793	0.00682516	0.145113	-2.16514	2.16589
SLM1	-1.33594	17.4113	-3.48335	0.00698292	0.145113	-2.18676	2.15596
FUN30	-1.66655	14.9956	-3.47985	0.00702133	0.145113	-2.19195	2.15358
PSP2	-1.31077	15.5937	-3.47907	0.00702996	0.145113	-2.19311	2.15305
SRP72	-1.14522	17.3227	-3.46019	0.00724136	0.146395	-2.22113	2.14018
GNP1	-1.84087	15.2094	-3.45149	0.00734107	0.146896	-2.23407	2.13424
RGC1	-1.46874	16.1723	-3.43543	0.00752873	0.147107	-2.25795	2.12328
TCB3	-1.22548	16.4875	-3.43172	0.00757283	0.147107	-2.26347	2.12074
CBR1	-1.4567	17.2279	-3.43083	0.00758351	0.147107	-2.26481	2.12013
TOR1	-1.53901	16.2657	-3.3945	0.00803039	0.151999	-2.31897	2.09526
RPN12	-1.1555	17.0641	-3.39207	0.00806116	0.151999	-2.32258	2.0936
PDX3	-2.04854	14.0467	-3.369	0.00836041	0.153408	-2.35706	2.07777
SSH1	-1.29737	15.1215	-3.36464	0.00841827	0.153408	-2.36358	2.07478
CET1	-1.47606	15.5983	-3.36159	0.00845894	0.153408	-2.36814	2.07268
STE11	-1.20352	16.066	-3.35075	0.00860525	0.153408	-2.38436	2.06524
MCM2	-1.89164	15.4697	-3.34427	0.00869395	0.153593	-2.39406	2.06078
OLE1	-2.1335	14.5375	-3.31103	0.0091644	0.157848	-2.4439	2.0379
IKI3	-1.09175	17.584	-3.31021	0.00917626	0.157848	-2.44512	2.03733
NVJ2	-1.27504	14.2076	-3.30281	0.00928475	0.158325	-2.45624	2.03223
SVL3	-1.072	16.579	-3.28322	0.00957823	0.161389	-2.48566	2.01871
CDC31	-1.21237	15.777	-3.2799	0.00962903	0.161389	-2.49067	2.01642
GSP2	-1.28875	19.1082	-3.26899	0.00979758	0.161521	-2.50707	2.00888
BRE1	-1.26543	16.4857	-3.25506	0.0100173	0.162379	-2.52804	1.99925
NUM1	-1.52855	16.9882	-3.24977	0.0101021	0.162379	-2.53601	1.99559
NBA1	-1.56745	13.9785	-3.23663	0.0103158	0.16266	-2.5558	1.9865
RKR1	-1.15142	16.6116	-3.21859	0.0106171	0.16266	-2.58301	1.97399
ENT5	-1.03143	16.4152	-3.20398	0.0108676	0.16266	-2.60505	1.96386
SNF7	-1.01155	15.6215	-3.20131	0.0109141	0.16266	-2.60908	1.96201
KIC1	-1.09327	14.86	-3.20122	0.0109158	0.16266	-2.60923	1.96195
RAD23	-1.12277	15.2029	-3.18747	0.0111584	0.16266	-2.63	1.9524
DCK1	-1.52961	15.7902	-3.18454	0.0112107	0.16266	-2.63442	1.95037
UBP7	-1.22965	14.0874	-3.17989	0.0112944	0.16266	-2.64145	1.94714
RPO31	-1.07638	17.7312	-3.17736	0.0113402	0.16266	-2.64527	1.94538
BRO1	-1.25255	16.5983	-3.1693	0.0114875	0.16266	-2.65746	1.93978
RTG3	-1.86247	14.593	-3.16622	0.0115443	0.16266	-2.66212	1.93763
RPT3	-1.1965	18.7124	-3.16593	0.0115496	0.16266	-2.66256	1.93743
YKL075C	-1.08667	15.376	-3.16254	0.0116126	0.16266	-2.6677	1.93507
BRF1	-1.31642	14.5308	-3.14924	0.0118626	0.1639	-2.68782	1.92582
HSP26	-2.21297	17.9788	-3.14894	0.0118683	0.1639	-2.68827	1.92561
SKT5	-1.12159	17.3429	-3.14129	0.0120148	0.164762	-2.69986	1.92028
SUA7	-1.22775	16.8888	-3.11787	0.0124749	0.166403	-2.73534	1.90396
BEM3	-1.17464	14.3133	-3.11747	0.0124829	0.166403	-2.73595	1.90368
RPP2B	-1.36663	21.0848	-3.1125	0.012583	0.166403	-2.74349	1.90022
TIM44	-1.04237	15.8574	-3.10951	0.0126435	0.166403	-2.74802	1.89813
SIS1	-1.11836	20.3903	-3.10093	0.0128191	0.167589	-2.76104	1.89214
PUF4	-3.68936	18.3329	-3.06979	0.0134775	0.173878	-2.80831	1.87039
VPH1	-1.45381	16.2463	-3.06098	0.0136701	0.17521	-2.8217	1.86423
YKL033W-A	-1.16793	24.8436	-3.02871	0.0143998	0.177058	-2.87075	1.84164
PDC2	-1.24125	15.9566	-3.02692	0.0144414	0.177058	-2.87347	1.84039
DSL1	-1.18467	15.3571	-3.02473	0.0144926	0.177058	-2.87681	1.83885
DED1	-1.09725	19.6146	-3.02245	0.014546	0.177058	-2.88028	1.83726
RPL7B	-0.989608	18.6648	-3.02061	0.0145892	0.177058	-2.88307	1.83597
SGD1	-1.45441	16.36	-3.00856	0.0148757	0.177874	-2.90141	1.82752
ELP3	-1.19788	17.7807	-2.99916	0.0151033	0.179133	-2.91572	1.82093
RIF1	-1.12575	14.9043	-2.98798	0.0153785	0.179133	-2.93274	1.81309
MTR10	-1.20543	15.4439	-2.9737	0.0157376	0.181538	-2.95449	1.80306
PPZ1	-0.967424	15.4421	-2.96026	0.0160837	0.184445	-2.97498	1.79361
CTR86	-1.19579	16.4248	-2.95521	0.0162157	0.184877	-2.98268	1.79007
OCH1	-2.62565	15.0056	-2.94371	0.0165203	0.186186	-3.00021	1.78198
NOP12	-0.952397	19.0282	-2.92118	0.0171345	0.189553	-3.03457	1.76613
ERG13	-1.02303	17.0079	-2.92059	0.0171507	0.189553	-3.03546	1.76572
YTA6	-1.28828	14.2607	-2.91862	0.0172057	0.189553	-3.03848	1.76433
LAS17	-1.19664	15.8843	-2.90536	0.0175796	0.19152	-3.0587	1.75499
RSC3	-0.968517	20.2587	-2.90146	0.0176912	0.191671	-3.06466	1.75224
EMP47	-1.52868	16.2648	-2.89304	0.0179344	0.192384	-3.0775	1.74631
ESL1	-1.41806	13.9466	-2.89239	0.0179533	0.192384	-3.07849	1.74586
YCS4	-1.19925	14.8772	-2.88156	0.0182717	0.194732	-3.09502	1.73822
SBE22	-1.2799	15.0339	-2.87231	0.0185481	0.195889	-3.10914	1.7317
ECM29	-1.18183	17.0839	-2.87125	0.01858	0.195889	-3.11076	1.73095
VPS15	-1.40525	14.0891	-2.8612	0.0188858	0.196361	-3.1261	1.72386
YBR225W	-1.69224	15.1282	-2.85992	0.0189252	0.196361	-3.12806	1.72296
AAP1	-0.986091	13.3993	-2.83878	0.0195868	0.199936	-3.16035	1.70804
VPS4	-1.01033	16.7312	-2.83105	0.0198345	0.199936	-3.17215	1.70258
FKS1	-1.3178	18.8165	-2.82959	0.0198815	0.199936	-3.17437	1.70155
SPE3	-1.83871	15.5778	-2.81682	0.020299	0.201042	-3.19389	1.69253
LDO45	-3.40047	14.0312	-2.81136	0.0204801	0.201406	-3.20223	1.68867
IMD2	-2.21718	14.2854	-2.79784	0.0209355	0.202428	-3.22287	1.67912
EXO84	-1.57671	15.8914	-2.79727	0.0209551	0.202428	-3.22375	1.67871
PRT1	-0.907053	20.0121	-2.78612	0.0213389	0.204125	-3.24078	1.67083
ENO2	-1.20602	20.9471	-2.77682	0.0216647	0.205867	-3.25499	1.66425
MCM6	-1.38455	17.6383	-2.77198	0.021836	0.205867	-3.26237	1.66083
NOT3	-2.0223	16.9746	-2.767	0.0220141	0.206553	-3.26999	1.6573
RIA1	-1.02032	16.7166	-2.75923	0.0222945	0.208188	-3.28186	1.6518
CYR1	-1.27413	14.9033	-2.75125	0.0225864	0.209915	-3.29405	1.64615
HFD1	-3.96564	14.7604	-2.7414	0.0229519	0.21204	-3.30909	1.63918
THS1	-1.15613	17.589	-2.73508	0.0231896	0.212499	-3.31874	1.63471
DIG1	-1.04076	17.1903	-2.725	0.0235739	0.213546	-3.33413	1.62757
LSB5	-0.987822	14.8208	-2.71896	0.0238075	0.213546	-3.34337	1.62329
YPR089W	-1.27363	16.7395	-2.71868	0.0238184	0.213546	-3.3438	1.62309
MNN9	-0.939118	17.6198	-2.71537	0.0239473	0.213546	-3.34885	1.62074
GDH1	-1.2673	16.0498	-2.71237	0.0240649	0.213546	-3.35343	1.61862
SEC8	-1.04718	16.4906	-2.71055	0.0241362	0.213546	-3.3562	1.61733
YGL117W	-1.40583	15.7691	-2.70681	0.0242839	0.213546	-3.36191	1.61468
MSN4	-1.49095	13.8771	-2.69501	0.0247564	0.215499	-3.37994	1.60631
NMA1	-1.62533	17.0268	-2.69305	0.0248356	0.215499	-3.38293	1.60492
COG4	-1.41989	14.7904	-2.68466	0.025178	0.216553	-3.39574	1.59898
CUE3	-1.24261	17.3573	-2.68015	0.0253638	0.217198	-3.40261	1.59579
SLC1	-1.10484	14.9085	-2.67488	0.0255834	0.217384	-3.41067	1.59204
UBR2	-1.04924	14.6629	-2.67237	0.0256881	0.217384	-3.41449	1.59027
FKH1	-1.66806	15.5794	-2.67166	0.0257181	0.217384	-3.41558	1.58976
SGN1	-1.71863	16.6181	-2.6609	0.0261739	0.217438	-3.432	1.58213
PRP6	-1.60411	14.5277	-2.65641	0.0263665	0.217438	-3.43885	1.57895
KAP104	-0.959311	18.1545	-2.65605	0.0263821	0.217438	-3.4394	1.57869
BEM1	-1.00819	16.9958	-2.63187	0.0274453	0.223098	-3.47629	1.56153
YCR043C	-2.52111	14.6218	-2.62879	0.0275837	0.223098	-3.48099	1.55935
RPN13	-0.816934	18.2751	-2.627	0.0276644	0.223098	-3.48371	1.55808
VMA13	-0.968078	19.5246	-2.62371	0.0278134	0.223098	-3.48872	1.55575
SSE2	-0.98154	17.2364	-2.62156	0.0279114	0.223098	-3.49201	1.55422
NOP56	-1.55154	20.9679	-2.61911	0.0280235	0.223098	-3.49575	1.55248
ZDS1	-1.20831	14.667	-2.61708	0.0281163	0.223098	-3.49883	1.55104
NIC96	-0.89813	17.4874	-2.61495	0.0282143	0.223098	-3.50208	1.54953
CDC28	-1.1163	19.1876	-2.60276	0.028782	0.22318	-3.52066	1.54088
GLC7	-1.26667	16.3964	-2.60064	0.0288822	0.22318	-3.52389	1.53937
HHF1	-1.02042	21.0107	-2.60051	0.0288883	0.22318	-3.52409	1.53928
YFR016C	-1.40735	13.5981	-2.6001	0.0289076	0.22318	-3.52471	1.53899
INP51	-1.98725	13.5999	-2.57193	0.0302702	0.227362	-3.56763	1.51898
CMD1	-0.938561	18.6577	-2.56457	0.0306368	0.227362	-3.57883	1.51376
CHS3	-1.05291	14.7581	-2.56323	0.0307038	0.227362	-3.58087	1.51281
RPT6	-0.800735	20.2704	-2.5542	0.0311607	0.227362	-3.59461	1.50639
EFR3	-1.01996	15.7269	-2.55186	0.03128	0.227362	-3.59817	1.50473
BUD27	-1.00509	16.0746	-2.54918	0.0314174	0.227362	-3.60225	1.50283
SRB5	-1.9781	15.255	-2.54668	0.0315461	0.227362	-3.60605	1.50105
RTC1	-1.15831	15.2369	-2.54248	0.0317632	0.227362	-3.61243	1.49808
SRO7	-1.0355	16.4554	-2.54233	0.0317711	0.227362	-3.61266	1.49797
CCL1	-1.13801	15.3453	-2.54174	0.0318017	0.227362	-3.61355	1.49755
KSP1	-2.16124	15.192	-2.53976	0.031905	0.227362	-3.61657	1.49614
TY1B-GR1	-0.964358	18.2453	-2.53917	0.0319356	0.227362	-3.61746	1.49572
YAP1	-1.02649	17.4537	-2.53512	0.0321482	0.227362	-3.62363	1.49284
YPR022C	-1.02034	15.6778	-2.53242	0.0322902	0.227362	-3.62773	1.49093
SKI2	-1.00318	16.9234	-2.53175	0.0323257	0.227362	-3.62875	1.49045
HIS4	-1.64439	14.8302	-2.53076	0.0323782	0.227362	-3.63026	1.48975
GRX7	-1.02721	15.2431	-2.52639	0.0326102	0.227362	-3.63689	1.48665
REH1	-1.04876	15.523	-2.52503	0.0326828	0.227362	-3.63896	1.48568
PBP1	-1.06604	19.9569	-2.52208	0.0328412	0.227362	-3.64345	1.48358
FCF2	-1.15542	16.2734	-2.51709	0.0331104	0.227362	-3.65103	1.48004
IMH1	-1.31382	17.7803	-2.51572	0.0331842	0.227362	-3.6531	1.47907
CAR2	-1.54725	14.5392	-2.51305	0.0333295	0.227362	-3.65716	1.47717
SWI5	-1.52032	13.9718	-2.50811	0.0336001	0.227362	-3.66467	1.47366
SLH1	-1.56036	18.3448	-2.50475	0.0337854	0.227362	-3.66978	1.47127
URB2	-1.51264	16.6979	-2.49978	0.0340609	0.227362	-3.67732	1.46774
HTZ1	-0.921828	16.785	-2.49761	0.0341822	0.227362	-3.68062	1.4662
EFB1	-1.02583	20.3634	-2.4967	0.0342328	0.227362	-3.68199	1.46556
IOC2	-0.987784	16.9955	-2.49335	0.034421	0.227362	-3.68708	1.46318
SUB2	-0.987912	20.4986	-2.49134	0.0345341	0.227362	-3.69012	1.46175
ADH6	-1.06834	15.4145	-2.48895	0.0346697	0.227362	-3.69376	1.46005
PAM1	-2.09282	14.4363	-2.48763	0.0347445	0.227362	-3.69575	1.45911
COP1	-0.85792	19.014	-2.48644	0.0348124	0.227362	-3.69757	1.45827
FKH2	-1.0642	15.971	-2.4854	0.0348716	0.227362	-3.69914	1.45753
MDN1	-0.824153	19.3131	-2.48192	0.0350705	0.227362	-3.70442	1.45506
YCF1	-2.03131	13.9099	-2.48132	0.0351046	0.227362	-3.70532	1.45464
EDC3	-1.06724	18.4725	-2.47657	0.0353787	0.227362	-3.71253	1.45126
KIN2	-1.16911	15.3385	-2.47446	0.0355009	0.227362	-3.71573	1.44976
CYC8	-0.891602	17.0414	-2.47434	0.0355079	0.227362	-3.71591	1.44967
EBS1	-1.42336	16.3605	-2.47378	0.0355403	0.227362	-3.71676	1.44928
TAF10	-1.73395	15.0313	-2.47286	0.0355941	0.227362	-3.71816	1.44862
PBP4	-0.909568	18.7367	-2.46786	0.0358863	0.227486	-3.72574	1.44507
WHI4	-1.78981	15.1843	-2.46326	0.0361571	0.227486	-3.7327	1.44181
KAP114	-1.17128	16.0053	-2.46264	0.0361936	0.227486	-3.73364	1.44137
PAF1	-1.32349	17.1459	-2.44933	0.03699	0.229304	-3.7538	1.43192
FUN12	-0.774674	19.0958	-2.44776	0.0370851	0.229304	-3.75617	1.4308
MAK21	-0.793923	20.8862	-2.44479	0.0372661	0.229304	-3.76068	1.42869
SEC24	-0.861227	18.4122	-2.44467	0.0372735	0.229304	-3.76086	1.4286
UFD4	-0.985733	18.374	-2.44423	0.0372998	0.229304	-3.76152	1.42829
HOC1	-0.87136	17.3563	-2.44323	0.037361	0.229304	-3.76303	1.42758
GCR2	-1.08276	15.9045	-2.4423	0.0374182	0.229304	-3.76445	1.42692
TIF5	-0.933779	18.263	-2.42997	0.0381801	0.230626	-3.7831	1.41816
INP52	-0.872436	15.4068	-2.42865	0.0382624	0.230626	-3.78509	1.41723
SEC6	-1.62699	16.6534	-2.4186	0.0388961	0.231961	-3.80028	1.41009
YML119W	-1.18082	15.7785	-2.41163	0.0393419	0.233786	-3.81081	1.40514
DBF2	-0.987447	16.9193	-2.40917	0.0395008	0.234022	-3.81454	1.40339
HLJ1	-2.04386	13.7953	-2.40338	0.0398763	0.234092	-3.82328	1.39929
HTB1	-0.930626	22.5102	-2.40226	0.0399492	0.234092	-3.82496	1.39849
ALY2	-0.892542	17.4348	-2.39913	0.0401539	0.234092	-3.82969	1.39627
KAR4	-1.21455	16.1132	-2.39784	0.0402391	0.234092	-3.83164	1.39535
NSE3	-1.08006	14.8846	-2.39665	0.040317	0.234092	-3.83343	1.39451
CCA1	-2.25274	14.6767	-2.39466	0.0404486	0.234092	-3.83644	1.3931
SNF5	-0.947383	17.8483	-2.39445	0.0404627	0.234092	-3.83676	1.39295
RPL6B	-1.06708	19.7518	-2.38584	0.0410361	0.234092	-3.84975	1.38683
RGD2	-1.07946	16.1923	-2.38364	0.041184	0.234092	-3.85307	1.38527
SST2	-2.06624	17.4381	-2.38159	0.0413217	0.234196	-3.85614	1.38382
ASN1	-2.19017	14.9765	-2.37757	0.0415939	0.23506	-3.8622	1.38097
APM3	-1.13855	16.6131	-2.37002	0.0421104	0.236615	-3.87358	1.37561
RRP3	-0.957623	19.0211	-2.36537	0.0424319	0.237291	-3.88059	1.37231
VPS34	-0.948118	15.1266	-2.36022	0.0427899	0.237708	-3.88833	1.36866
SEC28	-1.17782	18.276	-2.35619	0.0430726	0.238502	-3.8944	1.3658
RPP1B	-1.43165	19.9268	-2.35472	0.043176	0.238502	-3.89661	1.36476
NSP1	-0.945697	16.9525	-2.35178	0.0433845	0.238834	-3.90105	1.36267
LEO1	-1.00695	16.2281	-2.34789	0.043661	0.238834	-3.9069	1.35991
UTP10	-0.932208	18.9285	-2.34544	0.0438357	0.238834	-3.91057	1.35817
MET17	-1.06686	17.8772	-2.34542	0.0438369	0.238834	-3.9106	1.35816
LCP5	-0.822686	16.9481	-2.34531	0.0438451	0.238834	-3.91077	1.35808
NMD2	-1.08193	14.7942	-2.33515	0.0445783	0.24127	-3.92603	1.35088
OSH3	-1.42573	15.3834	-2.33401	0.0446614	0.24127	-3.92774	1.35007
LST8	-1.16186	17.3332	-2.32977	0.0449719	0.241722	-3.93412	1.34706
COG3	-1.18234	15.4607	-2.3282	0.0450873	0.241722	-3.93648	1.34595
APL1	-0.820168	16.9271	-2.32352	0.0454328	0.24176	-3.94349	1.34263
RPP2A	-1.07705	20.8058	-2.31809	0.0458372	0.24176	-3.95164	1.33878
ILV2	-0.790332	20.8258	-2.31048	0.0464102	0.24176	-3.96305	1.33339
CLA4	-1.13947	15.3624	-2.3089	0.0465299	0.24176	-3.96542	1.33227
RPA135	-0.826555	19.96	-2.3088	0.0465377	0.24176	-3.96557	1.3322
FAA1	-1.0457	16.7279	-2.30853	0.0465584	0.24176	-3.96598	1.332
SMC3	-0.995993	18.258	-2.30696	0.0466775	0.24176	-3.96833	1.33089
HAT2	-1.0403	18.7502	-2.30696	0.0466775	0.24176	-3.96833	1.33089
TFC4	-1.06122	15.2317	-2.30634	0.0467246	0.24176	-3.96926	1.33045
ARP3	-0.846099	20.1329	-2.30315	0.0469688	0.242063	-3.97404	1.32819
GCN20	-0.832955	17.8971	-2.30235	0.0470302	0.242063	-3.97524	1.32762
PUP3	-2.40219	14.5576	-2.30003	0.0472088	0.242347	-3.97872	1.32598
ACF4	-1.17591	15.2744	-2.2952	0.0475818	0.243624	-3.98595	1.32256
NUP84	-0.878139	16.0276	-2.2933	0.0477299	0.243729	-3.9888	1.32121
HSE1	-0.772982	16.5109	-2.29028	0.0479651	0.243729	-3.99331	1.31908
ARP5	-1.02526	16.5106	-2.29015	0.0479752	0.243729	-3.9935	1.31898
RMD8	-0.975781	14.0276	-2.28441	0.0484269	0.245238	-4.0021	1.31491
ARL3	-0.937762	15.9053	-2.27628	0.0490726	0.24661	-4.01424	1.30916
VPS53	-0.861343	14.6483	-2.27494	0.04918	0.24661	-4.01624	1.30821
CDC73	-1.0605	16.7209	-2.2716	0.0494489	0.24661	-4.02124	1.30584
SAC1	-1.30467	15.0112	-2.27037	0.0495483	0.24661	-4.02308	1.30497
YBL036C	-1.13266	16.0904	-2.2685	0.0496992	0.246698	-4.02587	1.30365
SLY1	-0.891139	17.2568	-2.26492	0.0499902	0.246916	-4.03121	1.30112

## Sheet: (6) Enriched & present mutant
Enriched in mutant over wild type and present in mutant over untagged control.
Symbol	logFC	AveExpr	t	P.Value	adj.P.Val	B	negLogP
MRPL8	2.0115	16.3025	5.77345	0.000276135	0.0805878	0.808803	3.55888
MRM1	1.84373	15.3387	5.2086	0.000571511	0.0972707	0.151438	3.24298
IMG2	1.7116	16.5033	4.09968	0.00272153	0.131933	-1.29737	2.56519
MRPL51	1.51941	17.1819	3.95886	0.00336028	0.131933	-1.49584	2.47362
MRP51	1.81014	15.1961	3.68197	0.00512651	0.13629	-1.89453	2.29018
PPN1	1.91964	15.8378	3.52671	0.00652467	0.14406	-2.12256	2.18544
MRPL20	1.33226	18.5971	3.47019	0.0071286	0.145616	-2.20629	2.147
MRPL9	1.34617	17.2778	3.42515	0.00765164	0.147107	-2.27327	2.11625
AAD16	2.07066	15.3808	3.33497	0.00882293	0.15448	-2.40799	2.05439
MRPL3	1.68494	17.9531	3.26873	0.00980164	0.161521	-2.50746	2.0087
MYO4	1.89265	17.9997	3.25064	0.0100881	0.162379	-2.53469	1.99619
MIA40	1.18072	14.4848	3.17854	0.0113188	0.16266	-2.64349	1.9462
GEP5	2.09226	14.7425	3.16654	0.0115385	0.16266	-2.66165	1.93785
MRPL13	1.31128	17.6797	3.13602	0.0121168	0.165008	-2.70784	1.91661
MRX1	0.982275	18.6003	3.07873	0.0132851	0.17253	-2.79474	1.87664
REX4	0.931628	15.8075	3.02147	0.0145689	0.177058	-2.88176	1.83657
MRPL4	1.39341	17.0041	3.01726	0.0146682	0.177058	-2.88817	1.83362
MRPL23	1.46458	16.5949	3.0152	0.0147172	0.177058	-2.89131	1.83217
Puf3_TAP	1.27969	21.5926	2.99334	0.015246	0.179133	-2.92459	1.81684
MRP7	1.40882	16.3712	2.98917	0.0153489	0.179133	-2.93093	1.81392
YHB1	3.55022	21.3375	2.9219	0.0171144	0.189553	-3.03347	1.76664
RRG8	1.49568	16.3948	2.82463	0.0200427	0.200529	-3.18196	1.69804
IRC25	1.23134	15.8027	2.81768	0.0202705	0.201042	-3.19257	1.69314
MRPL49	1.37275	15.081	2.80953	0.0205411	0.201406	-3.20502	1.68738
RRM3	1.00265	16.3532	2.80249	0.0207778	0.202428	-3.21578	1.6824
MHR1	1.12173	16.7768	2.77205	0.0218336	0.205867	-3.26227	1.66088
RML2	1.09594	16.0999	2.66297	0.0260855	0.217438	-3.42883	1.5836
MRPL35	1.06769	17.9305	2.65587	0.0263898	0.217438	-3.43967	1.57856
MRPL10	1.11195	16.5566	2.65003	0.0266429	0.218605	-3.44859	1.57442
PEP8	1.15914	15.0295	2.6014	0.0288464	0.22318	-3.52274	1.53991
MRPL28	0.975608	17.271	2.58688	0.0295393	0.226727	-3.54486	1.5296
YML6	1.41893	18.0227	2.56677	0.0305266	0.227362	-3.57548	1.51532
RMD9	1.03118	17.3741	2.5185	0.0330336	0.227362	-3.64888	1.48104
RRG9	1.12291	16.7488	2.43968	0.0375786	0.229569	-3.76841	1.42506
VAR1	1.10906	15.2931	2.4324	0.0380288	0.230626	-3.77943	1.41989
IMG1	1.01015	16.7048	2.42742	0.0383397	0.230626	-3.78696	1.41635
TOM40	1.13727	16.1671	2.41935	0.0388488	0.231961	-3.79916	1.41062
RPM2	1.41178	17.0451	2.38373	0.041178	0.234092	-3.85293	1.38534
CPS1	0.76163	18.9887	2.37542	0.0417404	0.235209	-3.86544	1.37944
CSN3	2.55316	14.4264	2.31343	0.0461872	0.24176	-3.95863	1.33548
STE20	0.991254	21.708	2.28141	0.0486642	0.245322	-4.00658	1.31279
MRPL11	1.0527	16.9526	2.26704	0.0498176	0.246698	-4.02805	1.30262

## Sheet: (7) GO-term enriched wildtype
GO-term analysis of the proteins enriched in the Puf3 interactome from wild type cells compared to that of not4D.
PATH	ExpectedHitsInPATH	NumHitsInPATH	O_Over_E	TotInPATH	RawPvalue	AdjPvalue	Represented	SigsInPath
All aggregates in not4Δ or not4Δpuf3Δ	177.408	284	1.60083	4004	2.2e-16	2.2e-16	OVER	NUM1 , MDN1 , SEC24 , ENO2 , SLH1 , CHA1 , SMC3 , UTP10 , MCM6 , MCM5 , RPA135 , TAO3 , MCM4 , SEC16 , ILV2 , TOR1 , PEX6 , TCB3 , SKI2 , RPN1 , SST2 , RRP3 , CLA4 , GSY2 , STT4 , NUP170 , ECM29 , NIC96 , FUN12 , FAS2 , INP52 , DED1 , DCK1 , SRO7 , ARP3 , RPT6 , ASK10 , SIS1 , FAA1 , RIA1 , APL1 , POM152 , IKI3 , NUP188 , SSD1 , CHS1 , PRS5 , URB2 , OSH3 , FUN30 , PRT1 , YCF1 , GCN20 , KSP1 , MKT…
Aggregated more in not4Δ than in not4Δpuf3Δ	44.7065	90	2.01313	1009	5.47e-12	5.59e-11	OVER	NUM1 , SEC24 , SLH1 , CHA1 , SMC3 , UTP10 , RPA135 , MCM4 , SEC16 , ILV2 , PEX6 , TCB3 , SST2 , RRP3 , CLA4 , GSY2 , STT4 , ECM29 , FUN12 , INP52 , DCK1 , SRO7 , ARP3 , ASK10 , SIS1 , FAA1 , RIA1 , APL1 , POM152 , NUP188 , CHS1 , OSH3 , FUN30 , PRT1 , YCF1 , GCN20 , KSP1 , TCB1 , CCA1 , ELP3 , SRP72 , RAD5 , COP1 , GLC7 , YML119W , SLM1 , HDA1 , HCS1 , NVJ2 , RPT3 , ACF4 , NMD2 , DBF2 , STE11 , S…
Hsp90 interactors	21.4892	54	2.51289	485	1.07e-10	9.61e-10	OVER	ADE17 , ALD6 , ARP3 , CAR2 , CBR1 , CDC28 , CHA1 , COP1 , DED1 , ECM29 , EFB1 , EMP47 , ENO2 , ERG13 , FAA1 , FAS2 , FUN12 , GCN20 , GDH1 , GPP1 , HAT2 , HFD1 , HHF1 , HSP26 , IDP1 , IKI3 , ILV2 , KAP104 , MET17 , PRO2 , PRT1 , RPN1 , RPN13 , RPT3 , RPT6 , SAC1 , SEC17 , SEC24 , SEC28 , SIS1 , SLY1 , SPA2 , SSA1 , SSA2 , SSB1 , SSE1 , SSE2 , SUB2 , THS1 , TIF5 , VAS1 , VMA13 , VPS4 , YIR035C
chromatin organization_GO:0006325	14.0898	35	2.48406	318	4.1e-07	3.45e-06	OVER	FUN30 , NUP170 , HHF1 , CYC8 , CDC28 , RIF1 , PAF1 , SNF5 , BRE1 , SUB2 , NUP84 , TAF10 , HTB1 , SIR4 , RSC3 , HAT2 , GLC7 , PUF4 , RPT6 , FKH1 , MSN4 , SET3 , IOC2 , YCS4 , MCM5 , CDC73 , ZDS2 , RKR1 , ZDS1 , HDA1 , ARP5 , FKH2 , TOP2 , HTZ1 , LEO1
transcription from RNA polymerase II promoter_GO:0006366	20.736	39	1.88079	468	7.82e-05	0.000558993	OVER	FUN30 , RTG3 , HHF1 , VPS15 , CYC8 , CDC28 , PAF1 , SNF5 , KAR4 , BRE1 , SUB2 , NUP84 , PDC2 , TAF10 , HTB1 , RSC3 , RPT3 , RAD23 , GLC7 , RPT6 , SRB5 , NOT3 , FKH1 , MSN4 , VPS34 , IKI3 , CDC73 , YAP1 , HDA1 , FKH2 , GCR2 , CLA4 , HTZ1 , LEO1 , DIG1 , ELP3 , CET1 , CCL1 , SUA7
Golgi vesicle transport_GO:0048193	8.46277	21	2.48146	191	9.78e-05	0.000665724	OVER	SEC17 , EXO84 , SMY2 , APM3 , COP1 , ENT5 , SLY1 , COG3 , EMP47 , SEC6 , SEC28 , SEC24 , VPS53 , IMH1 , COG5 , DSL1 , ARL3 , SEC16 , SRO7 , SEC8 , COG4
regulation of translation_GO:0006417	4.51938	14	3.09777	102	0.000144203	0.000937317	OVER	EFB1 , FUN12 , WHI4 , SSB1 , EBS1 , SSD1 , RQC1 , GCN20 , PUF4 , PBP1 , SLH1 , RKR1 , SSB2 , TIF5
protein targeting_GO:0006605	13.4695	28	2.07876	304	0.000165429	0.0010057	OVER	SSA1 , NUP170 , RTG3 , KAP104 , VPS15 , CMD1 , SSH1 , APM3 , NUP84 , VPS41 , COG3 , NIC96 , KAP114 , HSE1 , TIM44 , NSP1 , SSA2 , NUP188 , POM152 , COG5 , CLA4 , PEX6 , MTR10 , ARL3 , BRO1 , SRP72 , SRP68 , COG4
proteolysis involved in cellular protein catabolic process_GO:0051603	9.43754	22	2.33112	213	0.000168789	0.0010057	OVER	SSA1 , PRE7 , NPL4 , UBX7 , RQC1 , RPT3 , RAD23 , PUP3 , RPN12 , RPT6 , RPN1 , EPS1 , PRE3 , SSA2 , UBR2 , SNF7 , RPN13 , HLJ1 , RKR1 , SIS1 , CDC31 , BRO1
nuclear transport_GO:0051169	8.01969	19	2.36917	181	0.000382581	0.00218836	OVER	SSA1 , NUP170 , RTG3 , KAP104 , CMD1 , SUB2 , NUP84 , SSB1 , NIC96 , KAP114 , NSP1 , SSA2 , NUP188 , POM152 , ZDS1 , SIS1 , SSB2 , CLA4 , MTR10
DNA-templated transcription, elongation_GO:0006354	4.29785	12	2.7921	97	0.00110828	0.00609555	OVER	VPS15 , PAF1 , SUB2 , RSC3 , RPT6 , NOT3 , FKH1 , VPS34 , CDC73 , FKH2 , LEO1 , CET1
nucleus organization_GO:0006997	2.92431	9	3.07765	66	0.00232591	0.0110868	OVER	NUP170 , CMD1 , KAR4 , NUP84 , NIC96 , OSH3 , NUP188 , POM152 , GSP2
regulation of DNA metabolic process_GO:0051052	4.74092	12	2.53115	107	0.00259837	0.0112679	OVER	CDC28 , NPL4 , PAF1 , BRE1 , RSC3 , FKH1 , UFD4 , MCM5 , CDC73 , FKH2 , TOP2 , LEO1
vesicle organization_GO:0016050	3.58892	10	2.78635	81	0.00287907	0.012109	OVER	SEC17 , VPS41 , SLY1 , SEC6 , SEC28 , SEC24 , SNF7 , BRO1 , SEC16 , VPS4
regulation of transport_GO:0051049	3.76615	10	2.65523	85	0.00410544	0.0167737	OVER	AKL1 , CYC8 , VPS41 , SLY1 , ASK10 , SEC6 , ALY2 , FKS1 , CLA4 , RGC1
carbohydrate metabolic process_GO:0005975	8.59569	17	1.97773	194	0.00535584	0.0201549	OVER	PSK1 , SKT5 , CHS3 , CDC28 , SNF5 , PDC2 , GLC7 , PYC1 , AAP1 , ENO2 , GPP1 , HOC1 , UGP1 , GSY2 , FKS1 , GCR2 , TCO89
protein phosphorylation_GO:0006468	8.64	17	1.96759	195	0.00563793	0.0206724	OVER	PSK1 , PKC1 , AKL1 , VPS15 , CDC28 , PAF1 , RPP1B , RPP2B , DBF2 , KSP1 , TOR1 , KIN2 , VPS34 , STE11 , CDC73 , CLA4 , CCL1
cellular response to DNA damage stimulus_GO:0006974	13.1594	23	1.7478	297	0.00610654	0.0218309	OVER	FUN30 , MCM2 , CYC8 , CDC28 , RIF1 , PAF1 , SNF5 , BRE1 , SUB2 , NUP84 , HTB1 , NSE3 , GLC7 , RPT6 , MCM6 , SMC3 , TOR1 , RAD5 , MCM5 , CDC73 , MKT1 , LEO1 , MCM4
cell morphogenesis_GO:0000902	1.28492	5	3.89128	29	0.00815873	0.0268464	OVER	BEM1 , GLC7 , KIC1 , TAO3 , SPA2
DNA replication_GO:0006260	6.15877	13	2.11081	139	0.0083848	0.0268464	OVER	MCM2 , CDC28 , RIF1 , BRE1 , RSC3 , GLC7 , MCM6 , FKH1 , HCS1 , MCM5 , FKH2 , TOP2 , MCM4
translational initiation_GO:0006413	2.34831	7	2.98087	53	0.0083467	0.0268464	OVER	FUN12 , BUD27 , TOR1 , SIS1 , DED1 , PRT1 , TIF5
translational elongation_GO:0006414	1.77231	6	3.38542	40	0.00772952	0.0268464	OVER	EFB1 , SSB1 , RQC1 , GCN20 , RKR1 , SSB2
cytoskeleton organization_GO:0007010	10.5009	19	1.80936	237	0.00860361	0.0268464	OVER	EFB1 , PKC1 , AKL1 , CMD1 , CDC28 , NPL4 , LSB5 , NUM1 , GLC7 , SLM1 , MHP1 , ARP3 , SPA2 , POM152 , LST8 , CLA4 , LAS17 , CDC31 , BEM3
signaling_GO:0023052	10.8111	19	1.75746	244	0.0115572	0.0351633	OVER	RTG3 , PKC1 , VPS15 , RGD2 , KSP1 , SLM1 , YVH1 , CYR1 , TOR1 , STE11 , DCK1 , SST2 , YAP1 , LST8 , PEX6 , RTC1 , BEM3 , TCO89 , SRO7
DNA repair_GO:0006281	10.8997	19	1.74317	246	0.0125351	0.0373443	OVER	FUN30 , MCM2 , CDC28 , RIF1 , PAF1 , SNF5 , BRE1 , SUB2 , NUP84 , HTB1 , NSE3 , RPT6 , MCM6 , SMC3 , RAD5 , MCM5 , CDC73 , LEO1 , MCM4
cell budding_GO:0007114	2.56985	7	2.7239	58	0.013501	0.0386127	OVER	CMD1 , CDC28 , BUD3 , GLC7 , KIC1 , TAO3 , SPA2
ribosome assembly_GO:0042255	2.56985	7	2.7239	58	0.013501	0.0386127	OVER	FUN12 , MAK21 , YVH1 , MDN1 , RPL6B , RIA1 , TIF5
endosomal transport_GO:0016197	4.51938	10	2.21269	102	0.0144752	0.0405873	OVER	VPS15 , ENT5 , HSE1 , SEC28 , SLM1 , VPS53 , SNF7 , BRO1 , RTT10 , VPS4
response to heat_GO:0009408	3.23446	8	2.47336	73	0.014859	0.0408622	OVER	HSP26 , NUP84 , GLC7 , TOR1 , MSN4 , STE11 , YAP1 , NUP188
organelle fusion_GO:0048284	3.89908	9	2.30824	88	0.0154129	0.0415858	OVER	SEC17 , CMD1 , KAR4 , VPS41 , YCF1 , SLY1 , OSH3 , ENO2 , SEC6
pseudohyphal growth_GO:0007124	3.27877	8	2.43994	74	0.0160418	0.0418431	OVER	PAM1 , OSH3 , KSP1 , FKH1 , SPA2 , STE11 , FKH2 , DIG1
organelle inheritance_GO:0048308	2.65846	7	2.6331	60	0.0160935	0.0418431	OVER	VPS15 , SHE3 , NUM1 , OLE1 , ARP3 , CLA4 , SEC8
exocytosis_GO:0006887	2.17108	6	2.76361	49	0.020228	0.0516536	OVER	EXO84 , OSH3 , SEC6 , KIN2 , SRO7 , SEC8

## Sheet: (8) GO-term enriched mutant
GO-term analysis of the proteins enriched in the Puf3 interactome from not4D cells.
PATH	ExpectedHitsInPATH	NumHitsInPATH	O_Over_E	TotInPATH	RawPvalue	AdjPvalue	Represented	SigsInPath
mitochondrion organization_GO:0007005	2.32615	27	11.6071	378	2.2e-16	2.2e-16	OVER	IMG1 , IMG2 , MRPL11 , MHR1 , MRPL35 , MRPL28 , RML2 , MRPL9 , RRM3 , MRPL8 , MRPL49 , MIA40 , MRPL13 , MRPL20 , GEP5 , MRPL4 , YML6 , RPM2 , MRPL3 , TOM40 , MRP7 , RRG9 , MRPL10 , MRPL23 , MRP51 , MRPL51 , RRG8
mitochondrial translation_GO:0032543	0.763077	20	26.2097	124	2.2e-16	2.2e-16	OVER	IMG1 , IMG2 , MRPL11 , MHR1 , MRPL35 , MRPL28 , RML2 , MRPL9 , MRPL8 , MRPL49 , MRPL13 , MRPL20 , MRPL4 , YML6 , MRPL3 , MRP7 , MRPL10 , MRPL23 , MRP51 , MRPL51
All Puf3 core targets	3.85231	27	7.00879	626	2.2e-16	2.2e-16	OVER	RML2 , MRM1 , MRPL49 , MRPL8 , MRPL20 , MRP7 , MHR1 , MIA40 , RMD9 , MRPL4 , MRPL23 , MRPL13 , IMG1 , MRPL9 , MRPL3 , IMG2 , MRPL51 , MRPL11 , MRPL10 , MRPL35 , RRG9 , YML6 , MRPL28 , MRP51 , GEP5 , MYO4 , TOM40
Mitochondrial Ribosomal Protein	0.338462	15	44.3182	55	2.2e-16	2.2e-16	OVER	MRP51 , MRP7 , MRPL10 , MRPL11 , MRPL13 , MRPL20 , MRPL23 , MRPL28 , MRPL3 , MRPL35 , MRPL4 , MRPL49 , MRPL51 , MRPL8 , MRPL9
Puf3 core targets Group 2	0.818462	11	13.4398	133	2.42e-10	4.95e-10	OVER	MRPL23 , MRPL13 , IMG1 , MRPL9 , MRPL3 , IMG2 , MRPL51 , MRPL11 , MRPL10 , MRPL35 , RRG9
Puf3 core targets Group 1	0.8	10	12.5	130	3.69e-09	7.42e-09	OVER	RML2 , MRM1 , MRPL49 , MRPL8 , MRPL20 , MRP7 , MHR1 , MIA40 , RMD9 , MRPL4
All aggregates in not4Δ or not4Δpuf3Δ	24.64	39	1.58279	4004	9.3e-08	1.8e-07	OVER	RPM2 , AAD16 , STE20 , MYO4 , MRX1 , RRM3 , REX4 , RRG8 , TOM40 , MRPL3 , YHB1 , MRP51 , VAR1 , PEP8 , GEP5 , MIA40 , IMG1 , CPS1 , PPN1 , MRPL8 , MRPL23 , MRPL35 , MRP7 , MRPL51 , MRPL20 , IMG2 , RML2 , MRPL10 , RRG9 , MRPL13 , MRPL28 , YML6 , MHR1 , MRM1 , MRPL9 , RMD9 , MRPL4 , MRPL49 , MRPL11
Puf3 core targets Group 3	1.07692	4	3.71429	175	0.0218215	0.040006	OVER	YML6 , MRPL28 , MRP51 , GEP5
